# Supplementary material for: 1,2-Bis-perfluoroalkylations of alkenes and alkynes with perfluorocarboxylic anhydridesviathe formation of perfluoroalkylcopper intermediates
Source: Royal Society of Chemistry journal article supplement (doi:10.1039/d1ob01529j), 2021-01-01
Supplement: d1ob01529j1.pdf [file d1ob01529j1.pdf]

## SUPPORTING INFORMATION

# **1,2-Bis-perfluoroalkylations of alkenes and alkynes with perfluorocarboxylic anhydrides *via* the formation of perfluoroalkylcopper intermediates**

Takuma Tagami,<sup>a</sup> Yuma Aoki,<sup>a</sup> Shintaro Kawamura,<sup>\*a,b</sup> and Mikiko Sodeoka<sup>\*a,b</sup>

<sup>a</sup>*RIKEN Center for Sustainable Resource Science, 2-1 Hirosawa, Wako, Saitama 351-0198, Japan*

<sup>b</sup>*Synthetic Organic Chemistry Laboratory, RIKEN Cluster for Pioneering Research, 2-1 Hirosawa, Wako, Saitama 351-0198, Japan*

## **1. General Experimental**

**General:** All reactions involving air- and/or moisture-sensitive compounds were conducted in a dry vessel under a positive pressure of nitrogen gas by using a balloon filled with it. Analytical thin-layer chromatography (TLC) was performed on glass plates coated with 0.25 mm 230–400 mesh silica gel (Merck, Silica gel 60 F<sub>254</sub>) containing a fluorescent indicator. Visualization was accomplished by means of ultraviolet irradiation at 254 nm and/or by spraying an ethanolic solution of 12-molybdo(VI)phosphoric acid as a developing agent. Flash column chromatography was performed using Silica gel N-60 (spherical, neutral, 40–50  $\mu$ m, Kanto Chemical Co., Inc. (Kanto)).

### ***Instrumentation:***

#### ***NMR analysis***

<sup>1</sup>H, <sup>13</sup>C, and <sup>19</sup>F NMR spectra were recorded at room temperature on a JEOL JNM-ECS-400 NMR spectrometer at 400, 100, and 376 MHz, respectively. The proton chemical shift values are reported in parts per million (ppm,  $\delta$  scale) downfield from tetramethylsilane and referenced to the proton resonance of CHCl<sub>3</sub> ( $\delta$  7.26). The carbon chemical shift values are reported in parts per million (ppm,  $\delta$  scale) downfield from tetramethylsilane and referenced to the carbon resonance of CDCl<sub>3</sub> ( $\delta$  77.16). The fluorine chemical shift values are reported in parts per million (ppm,  $\delta$  scale) with CFCl<sub>3</sub> ( $\delta$  0.00) as an external standard. Chemical shifts are reported in ppm and *J* values in hertz (Hz). The data are presented in the following order: chemical shift, multiplicity (s = singlet, d = doublet, t = triplet, q = quartet, quint = quintet, m = multiplet and/or multiple resonances, and br = broad), signal area integration in natural numbers.

#### ***IR analysis***

Infrared spectra were measured on a Thermo Nicolet iS5. Only diagnostic absorptions are listed.

#### ***HRMS analysis***

ESI-MS spectra were measured on a Bruker micrOTOF-QII-RSL. The samples were diluted with MeOH for the measurement. EI-MS were taken on a JMS-T100GCV.

**Materials:** Chemical reagents were purchased from Wako Pure Chemical Industries, Ltd., Tokyo Chemical Industry Co., Ltd., Sigma-Aldrich Inc., and other commercial suppliers.

#### ***Preparation of known alkenes and alkynes (1):***

The known alkenes (**1a**,<sup>1</sup> **1c**,<sup>2</sup> **1e**,<sup>3</sup> **1f**,<sup>4</sup> **1g**,<sup>5</sup>) and alkynes (**4c**,<sup>6</sup> **4g**<sup>7</sup>) were prepared according to the literatures.

---

<sup>1</sup> H. Clavier, S. P. Nolan and M. Mauduit, *Organometallics*, 2008, **27**, 2287.

<sup>2</sup> K. Mori, *Tetrahedron*, 2009, **65**, 2798.

<sup>3</sup> J. D. Neukom, N. S. Perch, J. P. Wolfe, *J. Am. Chem. Soc.* 2010, **132**, 6276.

<sup>4</sup> P. R. Walker, C. D. Campbell, A. Suleman, G. Carr and E. A. Anderson, *Angew. Chem., Int. Ed.*, 2013, **52**, 9139.

<sup>5</sup> J. Mo, S. H. Kim, P. H. Lee, *Org. Lett.* 2010, **12**, 424.

<sup>6</sup> W.-K. Chan, C.-M. Ho, M.-K. Wong and C.-M. Che, *J. Am. Chem. Soc.* 2006, **128**, 14796.

<sup>7</sup> Y. R. Malpani, B. K. Biswas, H. S. Han, Y.-S. Jung and S. B. Han, *Org. Lett.* 2018, **20**, 1693.

## 2. Additional Results

### 2-1. Optimization of the amount of bpy

The amount of bpy used in the 1,2-bis-trifluoromethylation of alkene **1a** was optimised (Table S1). The conversion of **1a** was very rapid without bpy present, and the desired product **2a** was obtained despite the low yield and problematic amount of allylic trifluoromethylation product **3a** that was also formed (entry 1). To sufficiently suppress the formation of by-product **3a**, the use of 4.0 equiv. of bpy with respect to **1a** (2.0 equiv. of Cu salt) is essential (entries 2 vs. 3), in which the (bpy)<sub>2</sub>Cu(I) complex was presumably formed as a reactive Cu intermediate. Although the 4.0 equiv. of bpy slightly decreased the rate of conversion, the use of this amount remarkably improved the selectivity and yield of **2a**.

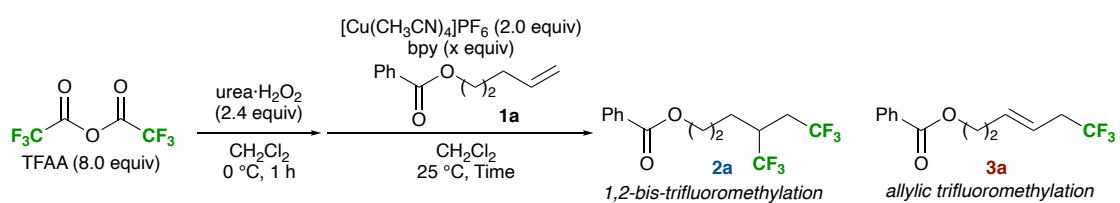

| Entry | Amount of bpy (equiv) | Time (min) | Conversion of <b>1a</b> (%) | NMR Yield |                 |              |
|-------|-----------------------|------------|-----------------------------|-----------|-----------------|--------------|
|       |                       |            |                             | <b>2a</b> | <b>3a</b> (E/Z) | <b>2a:3a</b> |
| 1     | 0                     | 5          | >99%                        | 32        | 28 (78/22)      | 53:47        |
| 2     | 2.0                   | 5          | >99%                        | 48        | 25 (78/22)      | 66:34        |
| 3     | 4.0                   | 5          | 78%                         | 42        | 4 (91/19)       | 91:9         |
| 4     | 4.0                   | 30         | >99%                        | 75        | 4 (91/19)       | 94:6         |

**Table S1. Optimisation of the amount of 2,2'-bipyridine (bpy).**

### 2-2. TEMPO trapping test

The 1,2-bis-trifluoromethylation reaction was performed in the presence of TEMPO to trap the radical intermediate of this reaction (Scheme S1). As a result, the 1,2-bis-trifluoromethylation reaction was suppressed and a TEMPO-CF<sub>3</sub> adduct was obtained. In addition, the ESI-MS analysis of the crude mixture (HRMS-ESI (*m/z*) [M+Na]<sup>+</sup> calcd. for C<sub>20</sub>H<sub>27</sub>F<sub>3</sub>N<sub>2</sub>NaO<sub>2</sub>, 407.1917; found, 407.1916) confirmed the formation of TEMPO-bearing oxy-trifluoromethylation product **6e**, suggesting the generation of a vinyl radical intermediate.

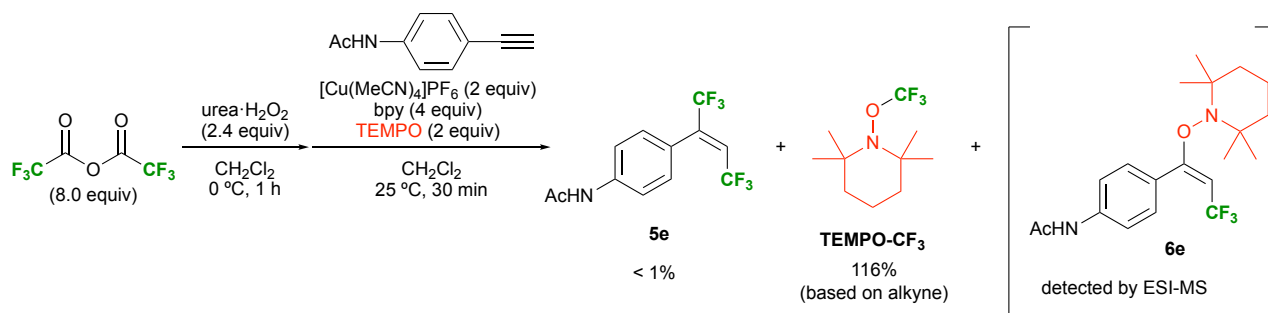

**Scheme S1. TEMPO trapping test to detect the radical intermediate of the 1,2-bis-trifluoromethylation.**

### 2-3. Detection of (bpy)Cu(CF<sub>3</sub>)<sub>3</sub> by <sup>19</sup>F NMR analysis

<sup>19</sup>F NMR analysis (using acetone-*d*<sub>6</sub>) revealed the presence of a (bpy)Cu(CF<sub>3</sub>)<sub>3</sub> complex in the crude mixture obtained after the workup of the 1,2-bis-trifluoromethylation reaction of **4e**.<sup>8</sup>

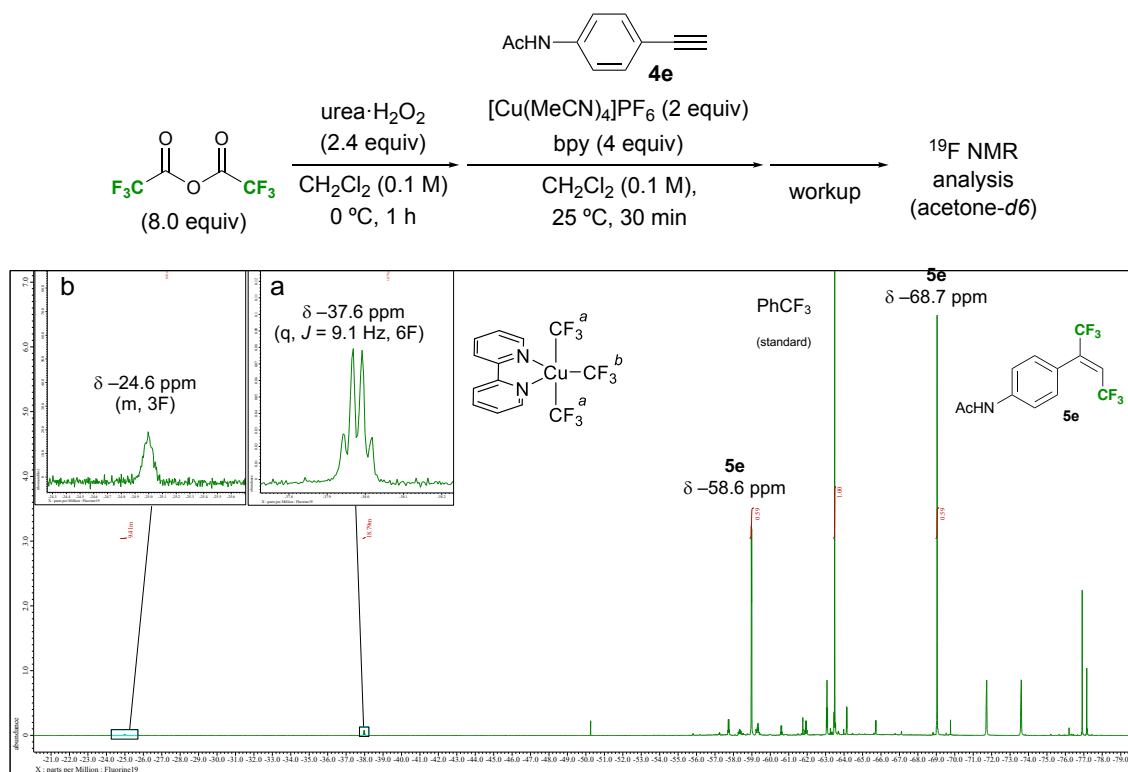

**Figure S1.** <sup>19</sup>F NMR analysis of the crude mixture obtained from the 1,2-bis-trifluoromethylation reaction of **4e**.

### 2-4. Stability comparison of copper intermediates

The thermal stabilities of several Cu(I) intermediates in the presence and absence of the bpy ligand (2.0 equiv. with respect to Cu) were compared to that of the precursor ([Cu(CH<sub>3</sub>CN)<sub>4</sub>]<sup>+</sup>) by means of DFT calculations (Scheme S2a). According to the literature<sup>9</sup> and experimental results in Table S1, in the presence of bpy, cationic intermediate **A** bearing two bpy ligands is formed. Under the optimal conditions determined for the 1,2-bis-trifluoromethylation process of the present study, a relatively high concentration of trifluoroacetic acid was found to exist in the reaction mixture. Therefore, neutral trifluoroacetate intermediate **F** and intermediate **G** bearing one bpy unit were also proposed to have formed; however, the calculated free energy relative to that of [Cu(CH<sub>3</sub>CN)<sub>4</sub>]<sup>+</sup> indicated that

<sup>8</sup> The <sup>19</sup>F NMR shifts and coupling patterns in acetone-*d*<sub>6</sub> were in good agreement with those reported in the literature: A. M. Romine, N. Nebra, A. I. Kononov, E. Martin, J. Benet-Buchholz and V. V. Grushin, *Angew. Chem., Int. Ed.*, 2015, **54**, 2745.

<sup>9</sup> (a) X. Lin, C. Hou, H. Li and Z. Weng, *Chem. Eur. J.*, 2016, **22**, 2075; (b) X. Lin, Z. Li, X. Han and Z. Weng, *RSC Adv.*, 2016, **6**, 75465.

intermediate **A** is the most stable ( $-25.7$  kcal/mol for **A** vs.  $-23.9$  and  $-21.6$  kcal/mol for **F** and **G**, respectively). Thus, **A** was concluded to be the reactive Cu(I) intermediate formed during 1,2-bis-trifluoromethylation. In the absence of bpy, the formation of a neutral species *via* the substitution of the precursor acetonitrile ligand with trifluoroacetate is favoured; this is in contrast to what was observed for the bpy complex. Furthermore, intermediates **J** and **K**, which are formed when one or two acetonitrile ligands, respectively, dissociate from **I**, are more stable than intermediate **I**.

We then examined the effect of the ligand on the free energy change for the formation of Cu(II)–CF<sub>3</sub> intermediates from Cu(I) intermediates and CF<sub>3</sub> radicals (Scheme S2b). As a result, the formation of [(bpy)<sub>2</sub>Cu(II)(CF<sub>3</sub>)]<sup>+</sup> (**C**) from [(bpy)<sub>2</sub>Cu]<sup>+</sup> (**A**) and CF<sub>3</sub> radicals ( $\Delta G_{Cu(II)} = -16.1$  kcal/mol) decreased the free energy to a greater extent than the acetonitrile–Cu(II)–CF<sub>3</sub> complexes did ( $\Delta G_{Cu(II)} \geq -8.8$  kcal/mol).

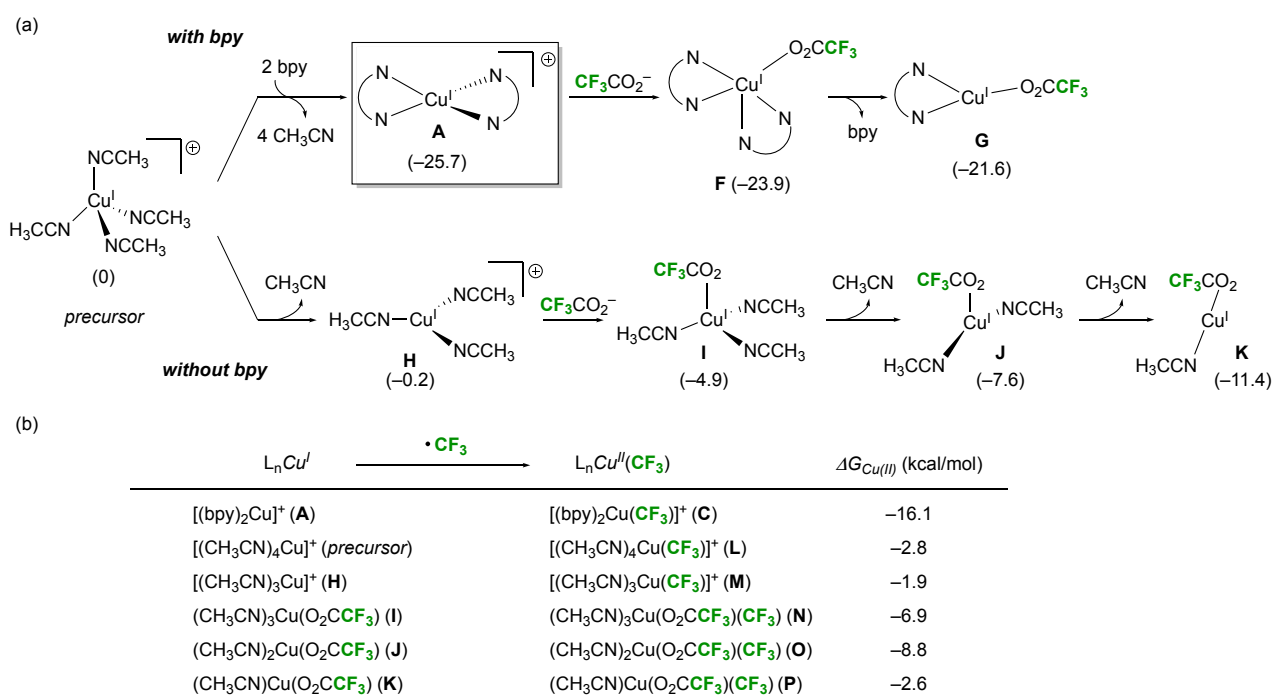

**Scheme S2. Ligand effect on the 1,2-bis-trifluoromethylation of alkenes: (a) Identification of stable Cu(I) intermediates (the free energies of each intermediate relative to that of [Cu(CH<sub>3</sub>CN)<sub>4</sub>]<sup>+</sup> are shown in parentheses). (b) A comparison of the free energy change upon the formation of Cu(II)–CF<sub>3</sub> intermediates.**

### 2-5. Possible pathways to (bpy)Cu(CF<sub>3</sub>)<sub>3</sub> (**Q**)

Here, we discuss possible pathways for the formation of (bpy)Cu(CF<sub>3</sub>)<sub>3</sub> (**Q**), which was observed in the crude mixture by NMR analysis. First, Cu(II)–CF<sub>3</sub> intermediate **C** reacts with the CF<sub>3</sub> radical, affording Cu(III) intermediate **R**. Then, the ligand exchange of intermediate **R** replaces the bpy ligand with trifluoroacetate and generates intermediate **S**. Finally, **Q** can be formed from **S** by ligand exchange

with **C** or the disproportionation of **S**. The free energy changes of these steps suggest that ligand exchange between **S** and **C** is more likely than the disproportionation of **S**.

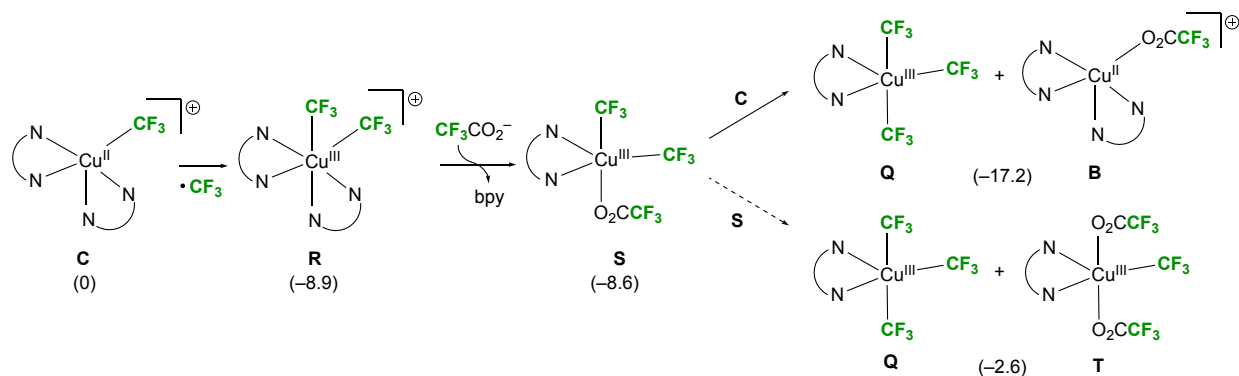

**Scheme S3. Possible pathways for the formation of (bpy)Cu(CF<sub>3</sub>)<sub>3</sub> (Q). The free energy of each intermediate relative to that of C are shown in parentheses.**

#### 2-6. Ligand effect on the coupling reaction with Cu(II)–CF<sub>3</sub> intermediates

The effect of the ligand on the coupling step was investigated by comparing the free energy changes between the reactions of the vinyl radical with [(bpy)<sub>2</sub>CuCF<sub>3</sub>]<sup>+</sup> (**C**) and the corresponding acetonitrile complex (CH<sub>3</sub>CN)<sub>2</sub>Cu(O<sub>2</sub>CCF<sub>3</sub>)(CF<sub>3</sub>) (**O**). The results indicate that bpy does not stabilise the Cu(III) intermediate because the decrease in the free energy of the formation of **D** is much smaller than that of the free energy of the formation of acetonitrile–Cu(III) intermediate **U** ( $\Delta G_{\text{Cu(III)}} = -2.5$  kcal/mol for the formation of **D** from **C** and  $-11.8$  kcal/mol for the formation of **U** from **O**). This could be due to steric repulsion between the ligands on **D**. In addition, the activation energies for the reductive eliminations of **D** and **U** indicated that bpy did not accelerate either process ( $\Delta G_{\text{RE}}^\ddagger = +7.3$  kcal/mol for the reductive elimination of **D** and  $+5.8$  kcal/mol for that of **U**). Thus, we concluded that the crucial role of bpy is to stabilise Cu(II)–CF<sub>3</sub> intermediate **C**, as discussed in the manuscript.

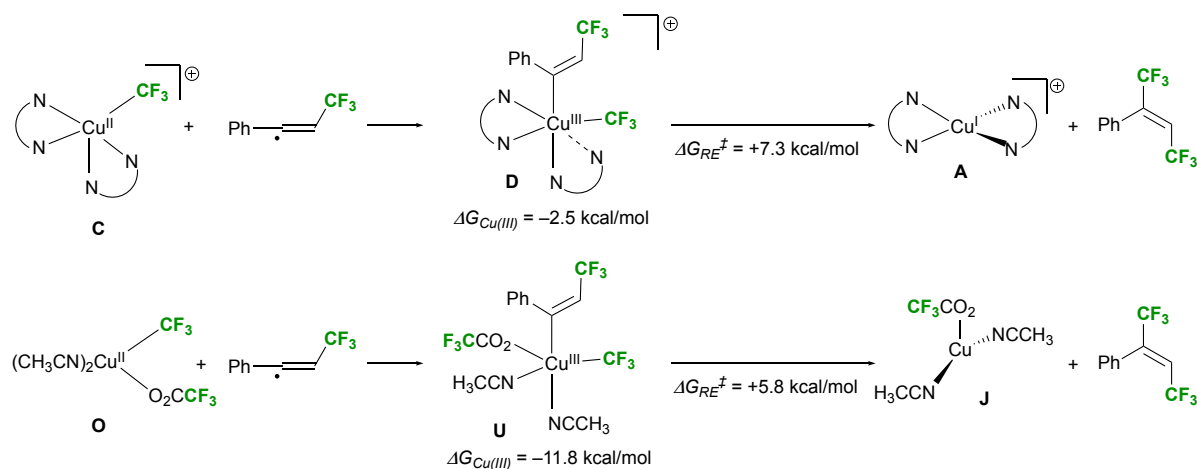

**Scheme S4. Ligand effect on the coupling step.**

## 2-7. Discussion of ligand effect on the product selectivity

When the reaction of **4e** was carried out in the absence of a ligand, we found that significant amounts of oxy-trifluoromethylation products, vinyl trifluoroacetate **6e** and ketone **7e**, were obtained instead of the desired bis-trifluoromethylated product (**5e**) (Scheme S5a). Ketone **7e** was considered to be formed by the hydrolysis of **6e** during the workup; it was also observed in low yield in the crude mixture of the reaction in the presence of bpy. Interestingly, the ratio of **7e** to **5e** was found to increase with increasing reaction time under optimal conditions using bpy.

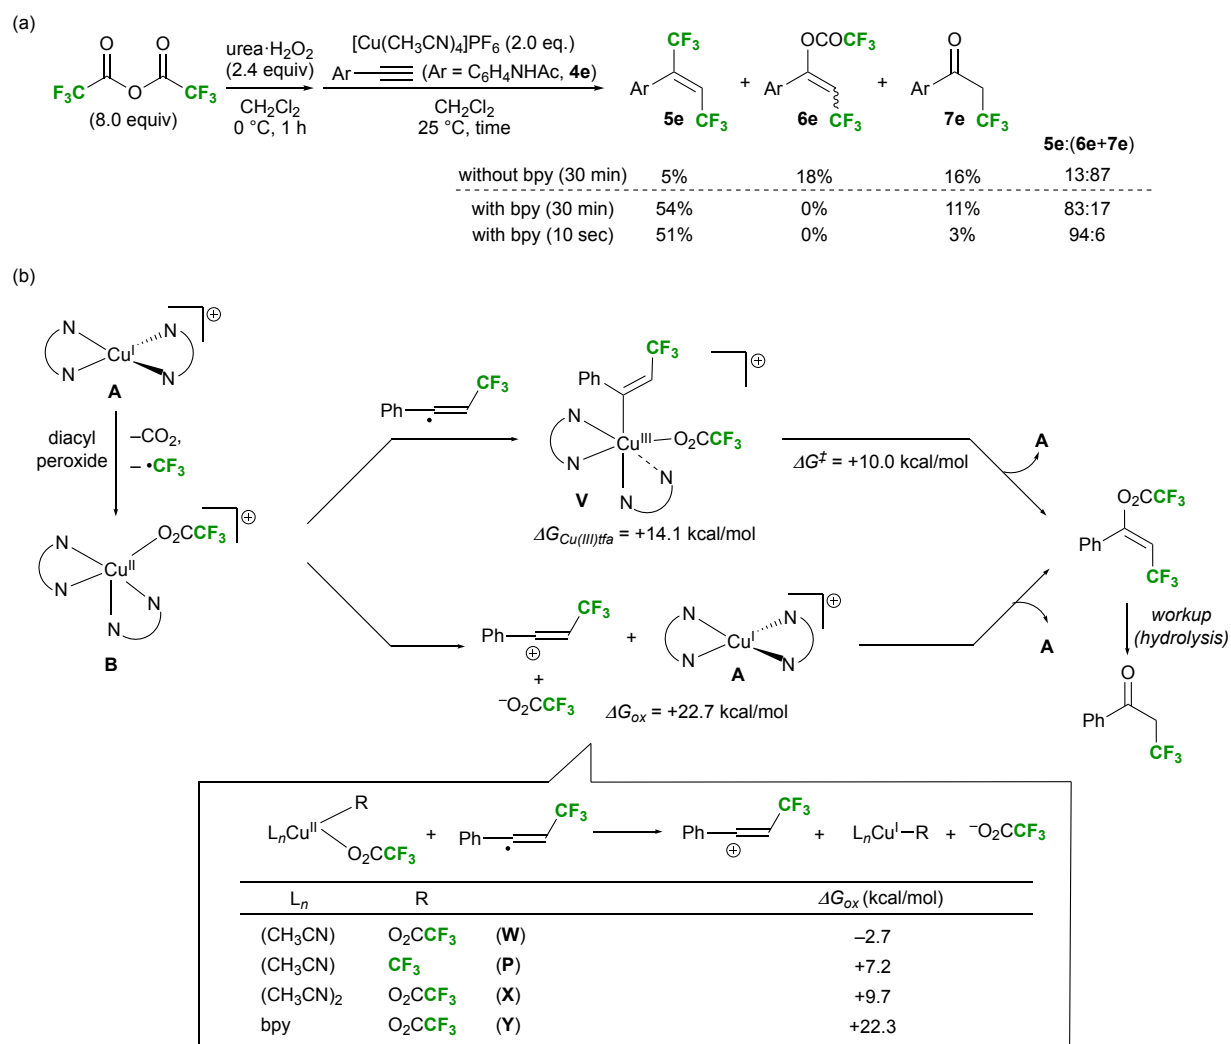

**Scheme S5. Proposed pathways of the oxy-trifluoromethylation side-reaction.**

The proposed mechanism for the formation of **6e** and **7e** is depicted in Scheme S5b. Cationic Cu(II) trifluoroacetate intermediate **B**, which is formed during the CF<sub>3</sub>-radical formation reaction that occurs between diacyl peroxide and **A**, was postulated to give the oxy-trifluoromethylation products. We proposed two pathways involving **B**; the first involves a C–O coupling reaction between **B** and the vinyl radical (top arrow). DFT calculations suggested that Cu(III) intermediate **V**, bearing vinyl and

trifluoroacetate groups, could be formed ( $\Delta G_{Cu(III)TFA} = +14.1$  kcal/mol), and subsequent reductive elimination would afford the oxy-trifluoromethylation products ( $\Delta G^\ddagger = +10.0$  kcal/mol). The concentration of intermediate **V** should increase at a later stage of the reaction. Furthermore, the stability of **V** is lower than that of  $(bpy)_2Cu(CF_3)(vinyl)$  (**D**) ( $\Delta G_{Cu(III)TFA} = +14.1$  kcal/mol for the formation of **V** vs.  $\Delta G_{Cu(III)} = -2.5$  kcal/mol for the formation of **D**), which suggests that the oxy-trifluoromethylation is much slower than the desired 1,2-bis-trifluoromethylation. This is in good agreement with the experimental results. The second proposed route is a vinyl cation-forming pathway that proceeds *via* the single-electron transfer (SET) between **B** and the vinyl radical (lower arrow). This pathway may also occur, but it is likely much slower than the other pathway due to the large increase in the free energy of the latter ( $\Delta G_{ox} = +22.7$  kcal/mol). On the other hand, without bpy, the SET event can proceed smoothly; this is according to its small change in free energy. Specifically, the change in free energy for the SET of the vinyl radical with  $(CH_3CN)Cu(O_2CCF_3)_2$  is  $\Delta G = -2.7$  kcal/mol. In the absence of bpy, not only does the C–O coupling increase the yield of the oxy-trifluoromethylation products (the change in the free energy change of the formation of  $(CH_3CN)Cu^{III}(O_2CCF_3)_2(vinyl)$ ,  $\Delta G = -13.2$  kcal/mol; the activation energy of reductive elimination of  $(CH_3CN)Cu^{III}(O_2CCF_3)_2(vinyl)$ ,  $\Delta G^\ddagger = +8.4$  kcal/mol), but the SET process does as well. Therefore, bpy was considered to play a role in inhibiting the undesired oxidation of the vinyl radical and in improving the product selectivity. This is also supported by the improvement in the selectivity of the 1,2-bis-trifluoromethylation of alkenes brought about by bpy (Table 1). Furthermore, the allylic trifluoromethylation side reaction, which is known to proceed *via* a carbocation generated by oxidation of the alkyl radical intermediate with a Cu(II) species (Scheme 1a), could be suppressed by bpy.



### 3. Experimental Procedures

#### General procedure

Trifluoroacetic anhydride (220  $\mu$ L, 1.6 mmol) was slowly added to a suspension of urea·H<sub>2</sub>O<sub>2</sub> (45 mg, 0.48 mmol) in CH<sub>2</sub>Cl<sub>2</sub> (2.0 mL) at 0 °C. After stirring for 1 h, the alkene or alkyne (0.20 mmol), 2,2'-bipyridine (125 mg, 0.80 mmol), and [Cu(CH<sub>3</sub>CN)<sub>4</sub>]PF<sub>6</sub> (149 mg, 0.40 mmol) were added at 0 °C. The mixture was immediately warmed to 25 °C and stirred for 30 min. After the addition of 5 mL of CH<sub>2</sub>Cl<sub>2</sub>, the reaction was quenched with an aqueous NaHCO<sub>3</sub> solution at 0 °C and then stirred at room temperature for 20 min. The aqueous layer was extracted three times with 5 mL of CH<sub>2</sub>Cl<sub>2</sub>. The combined organic phases were checked with XploSens PS<sup>®</sup> to confirm the absence of peroxide, and the water phase was treated with saturated Na<sub>2</sub>S<sub>2</sub>O<sub>3</sub> to decompose H<sub>2</sub>O<sub>2</sub>. The combined organic phases were dried over Na<sub>2</sub>SO<sub>4</sub> and the solvent was evaporated. Then,  $\alpha,\alpha,\alpha$ -trifluorotoluene (20 mg) was added as an internal standard, followed by a deuterated solvent (CDCl<sub>3</sub> or acetone-*d*<sub>6</sub>). <sup>1</sup>H and <sup>19</sup>F NMR analyses were conducted to estimate the NMR yield.<sup>10,11</sup> After the evaporation of the deuterated solvent, flash column chromatography of the crude mixture on silica gel afforded the target compound.

#### 6,6,6-Trifluoro-4-(trifluoromethyl)hexyl benzoate (2a)

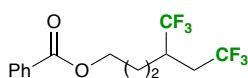

The reaction was carried out according to general procedure. The target compound was obtained as a colorless oil (38 mg, 58% yield) after silica gel column chromatography (CH<sub>2</sub>Cl<sub>2</sub>/hexane = 50/50).

<sup>1</sup>H NMR (400 MHz, CDCl<sub>3</sub>)

1.73–2.03 (m, 4H), 2.17–2.32 (m, 1H), 2.44–2.65 (m, 2H), 4.30–4.55 (m, 2H), 7.45 (t, *J* = 7.4 Hz, 2H), 7.57 (t, *J* = 7.4 Hz, 1H), 8.03 (d, *J* = 7.4 Hz, 2H)

<sup>13</sup>C NMR (100 MHz, CDCl<sub>3</sub>)

25.1, 25.7, 32.7 (q, *J* = 30 Hz), 38.4 (q, *J* = 27 Hz), 64.2, 126.0 (q, *J* = 274 Hz), 127.2 (q, *J* = 277 Hz), 128.6 (2C), 129.7 (2C), 130.2, 133.2, 166.6

<sup>19</sup>F NMR (376 MHz, CDCl<sub>3</sub>)

–71.0 (d, *J* = 8.6 Hz, 3F), –64.3 (t, *J* = 10.1 Hz, 3F)

IR (neat, cm<sup>-1</sup>)

2965, 1721, 1453, 1276, 1253, 1213, 1149, 1116, 1017, 1028, 712

HRMS-ESI (m/z)

[M+Na]<sup>+</sup> calcd. for C<sub>14</sub>H<sub>14</sub>F<sub>6</sub>O<sub>2</sub>, 351.0790; found, 351.0792

<sup>10</sup> The stereochemistry of 1,2-bis-perfluoroalkylated alkenes **5a**, **5d–5f** was assigned by comparison with literature data. The stereochemistry of the other alkenes (**5b**, **5c**, **5g–5k**) was determined by the characteristic coupling pattern of their <sup>19</sup>F NMR spectra; only *Z*-isomers show F–F coupling. See, S. Guo, D. I. AbuSalim, S. P. Cook, *Angew. Chem., Int. Ed.*, 2019, **58**, 11704.

<sup>11</sup> The *E/Z* ratio of 1,2-bis-perfluoroalkylated alkenes **5a–k** was determined by <sup>19</sup>F NMR analysis of the crude product.

### Ethyl 12,12,12-trifluoro-10-(trifluoromethyl)dodecanoate (2b)

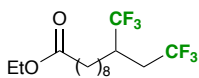

The reaction was carried out on according to general procedure. The target compound was obtained as a colorless oil (44mg, 62% yield) after silica gel column chromatography (CH<sub>2</sub>Cl<sub>2</sub>/hexane = 50/50).

<sup>1</sup>H NMR (400 MHz, CDCl<sub>3</sub>)

1.25 (t, *J* = 7.2 Hz, 3H), 1.25–1.34 (m, 6H), 1.36–1.45 (m, 2H), 1.48–1.76 (m, 6H), 2.12–2.24 (m, 1H), 2.28 (t, *J* = 7.6 Hz, 2H), 2.35–2.53 (m, 2H), 4.12 (q, *J* = 7.2 Hz, 2H)

<sup>13</sup>C NMR (100 MHz, CDCl<sub>3</sub>)

14.4, 25.1, 26.2, 28.4, 29.2 (2C), 29.3, 29.5, 32.8 (q, *J* = 30 Hz), 34.5, 38.0 (q, *J* = 27 Hz), 60.3, 126.1 (q, *J* = 274 Hz), 127.4 (q, *J* = 277 Hz), 174.0

<sup>19</sup>F NMR (376 MHz, CDCl<sub>3</sub>)

–71.1 (d, *J* = 8.6 Hz, 3F), –64.5 (t, *J* = 10.2 Hz, 3F)

IR (neat, cm<sup>-1</sup>)

2932, 2860, 1738, 1467, 1374, 1252, 1176, 1143, 1115, 1037, 801

HRMS-ESI (m/z)

[M+Na]<sup>+</sup> calcd. for C<sub>15</sub>H<sub>24</sub>F<sub>6</sub>O<sub>2</sub>, 373.1573; found, 373.1578

### 15,15,15-Trifluoro-13-(trifluoromethyl)pentadecan-2-one (2c)

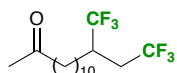

The reaction was carried out on according to general procedure. The target compound was obtained as a colorless oil (37 mg, 55% yield) after silica gel column chromatography (CH<sub>2</sub>Cl<sub>2</sub>/hexane = 40/60).

<sup>1</sup>H NMR (400 MHz, CDCl<sub>3</sub>)

1.24–1.30 (m, 12H), 1.36–1.45 (m, 2H), 1.50–1.60 (m, 3H), 1.65–1.76 (m, 1H), 2.13 (s, 3H), 2.15–2.29 (m, 1H), 2.37–2.52 (m, 2H), 2.41 (t, *J* = 7.6 Hz, 2H)

<sup>13</sup>C NMR (100 MHz, CDCl<sub>3</sub>)

24.0, 26.3, 28.4, 29.3, 29.4, 29.5 (3C), 29.6, 30.0, 32.8 (q, *J* = 30 Hz), 37.9 (q, *J* = 27 Hz), 44.0, 126.0 (q, *J* = 274 Hz), 127.3 (q, *J* = 277 Hz), 209.6

<sup>19</sup>F NMR (376 MHz, CDCl<sub>3</sub>)

–117.5 (m, 1F), –71.1 (d, *J* = 8.6 Hz, 3F), –64.5 (t, *J* = 10.2 Hz, 3F)

IR (neat, cm<sup>-1</sup>)

2929, 2858, 1717, 1409, 1362, 1251, 1142, 1118

HRMS-ESI (m/z)

[M+Na]<sup>+</sup> calcd. for C<sub>16</sub>H<sub>26</sub>F<sub>6</sub>O, 371.1780; found, 371.1780.

## 2-(5,5,5-Trifluoro-3-(trifluoromethyl)pentyl)isoindoline-1,3-dione (2d)

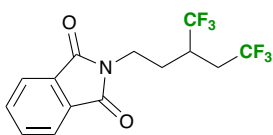

The reaction was carried out on according to general procedure. The target compound was obtained as a white solid (37 mg, 54% yield) after silica gel column chromatography (CH<sub>2</sub>Cl<sub>2</sub>/hexane = 60/40). The compound was identified by comparison of its spectra with the literature data.<sup>11</sup>

<sup>1</sup>H NMR (400 MHz, CDCl<sub>3</sub>)

1.92–2.03 (m, 1H), 2.08–2.20 (m, 1H), 2.24–2.39 (m, 1H), 2.47–2.66 (m, 2H), 3.82 (t, *J* = 7.2 Hz, 2H), 7.74 (dd, *J* = 5.6, 3.2 Hz, 2H), 7.86 (dd, *J* = 5.6, 3.2 Hz, 2H)

<sup>13</sup>C NMR (100 MHz, CDCl<sub>3</sub>)

27.6, 32.9 (q, *J* = 30 Hz), 35.3, 36.3 (q, *J* = 28 Hz), 123.6 (2C), 125.8 (q, *J* = 274 Hz), 126.9 (q, *J* = 277 Hz), 132.0 (2C), 134.3 (2C), 168.2 (2C)

<sup>19</sup>F NMR (376 MHz, CDCl<sub>3</sub>)

–71.4 (d, *J* = 8.6 Hz, 3F), –64.3 (t, *J* = 10.2 Hz, 3F)

IR (neat, cm<sup>-1</sup>)

2962, 2924, 2854, 1773, 1718, 1399, 1386, 1253, 1175, 1145, 1093, 1020, 870, 798

HRMS-ESI (m/z)

[M+Na]<sup>+</sup> calcd. for C<sub>14</sub>H<sub>11</sub>F<sub>6</sub>NO<sub>2</sub>, 362.0586; found, 362.0578.

## 6,6,6-Trifluoro-*N*-(4-fluorophenyl)-4-(trifluoromethyl)hexanamide (2e)

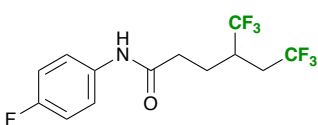

The reaction was carried out on according to general procedure. The target compound was obtained as a coreless oil (30 mg, 46% yield) after silica gel column chromatography (CH<sub>2</sub>Cl<sub>2</sub>).

<sup>1</sup>H NMR (400 MHz, CDCl<sub>3</sub>)

2.04–2.33 (m, 3H), 2.44–2.69 (m, 4H), 7.02 (t, *J* = 8.7 Hz, 2H), 7.16 (br, 1H), 7.40–7.48 (m, 2H)

<sup>13</sup>C NMR (100 MHz, CDCl<sub>3</sub>)

24.0, 33.0 (q, *J* = 30 Hz), 33.6, 37.3 (q, *J* = 27 Hz), 115.9 (d, *J* = 22 Hz, 2C), 122.0 (d, *J* = 8 Hz, 2C), 125.9 (q, *J* = 274 Hz), 127.1 (q, *J* = 278 Hz), 133.6 (d, *J* = 2 Hz), 159.5 (d, *J* = 243 Hz), 169.3

<sup>19</sup>F NMR (376 MHz, CDCl<sub>3</sub>)

–117.5 (m, 1F), –70.7 (d, *J* = 8.6 Hz, 3F), –62.3 (t, *J* = 11.3 Hz, 3F)

IR (neat, cm<sup>-1</sup>)

3291, 1662, 1617, 1558, 1539, 1509, 1409, 1250, 1214, 1144, 1109, 834

HRMS-ESI (m/z)

[M+Na]<sup>+</sup> calcd. for C<sub>13</sub>H<sub>11</sub>F<sub>7</sub>NO, 354.0699; found, 354.0695

#### 4-Methyl-*N*-(6,6,6-trifluoro-4-(trifluoromethyl)hexyl)benzenesulfonamide (2f)

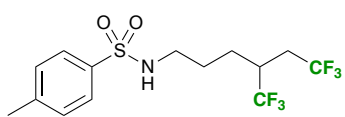

The reaction was carried out on according to general procedure. The target compound was obtained as a colorless oil (49 mg, 66% yield) after silica gel column chromatography (CH<sub>2</sub>Cl<sub>2</sub>).

<sup>1</sup>H NMR (400 MHz, CDCl<sub>3</sub>)

1.52–1.78 (m, 4H), 2.00–2.28 (m, 1H), 2.31–2.51 (m, 2H), 2.43 (s, 3H), 2.92–3.01 (m, 2H), 4.37 (t, *J* = 6.0 Hz, 1H), 7.32 (d, *J* = 8.3 Hz, 2H), 7.74 (d, *J* = 8.3 Hz, 2H)

<sup>13</sup>C NMR (100 MHz, CDCl<sub>3</sub>)

21.6, 25.5, 26.6, 32.6 (q, *J* = 30 Hz), 37.7 (q, *J* = 28 Hz), 43.0, 125.9 (q, *J* = 274 Hz), 127.0 (q, *J* = 277 Hz), 127.2 (2C), 130.0 (2C), 136.9, 143.8

<sup>19</sup>F NMR (376 MHz, CDCl<sub>3</sub>)

–71.0 (d, *J* = 8.6 Hz, 3F), –64.4 (t, *J* = 10.2 Hz, 3F)

IR (neat, cm<sup>–1</sup>)

3287, 2929, 1326, 1300, 1288, 1202, 1151, 1117, 1094, 816, 670, 662

HRMS-ESI (*m/z*)

[*M*+Na]<sup>+</sup> calcd. for C<sub>14</sub>H<sub>17</sub>F<sub>6</sub>NO<sub>2</sub>S, 400.0776; found, 400.0771.

#### 2-Methyl-5,6-bis(trifluoromethyl)hexahydro-1*H*-isoindole-1,3(2*H*)-dione (2g)

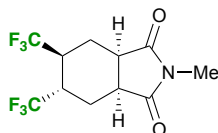

The reaction was carried out on according to general procedure. The target compound was obtained as a white solid (24 mg, 39% yield) after silica gel column chromatography (CH<sub>2</sub>Cl<sub>2</sub>/hexane = 50/50).<sup>12</sup>

<sup>1</sup>H NMR (400 MHz, CDCl<sub>3</sub>)

1.54 (q, *J* = 13.9 Hz, 1H), 1.68–1.78 (m, 1H), 2.41 (dt, *J* = 13.9, 5.4 Hz, 1H), 2.49 (ddd, *J* = 15.3, 6.9, 2.5 Hz, 1H), 2.53–2.66 (m, 1H), 2.70–2.81 (m, 1H), 2.83–2.92 (m, 1H), 3.00 (s, 3H), 2.98–3.08 (m, 1H)

<sup>13</sup>C NMR (100 MHz, CDCl<sub>3</sub>)

19.3, 21.1, 25.1, 35.7, 35.7 (q, *J* = 30 Hz), 36.8 (q, *J* = 28 Hz), 37.3, 125.3 (d, *J* = 41 Hz), 128.1 (d, *J* = 40 Hz), 177.9, 178.2

<sup>19</sup>F NMR (376 MHz, CDCl<sub>3</sub>)

–73.2 (m, 3F), –70.0 (m, 3F)

IR (neat, cm<sup>–1</sup>)

1703, 1700, 1286, 1256, 1218, 1183, 1163, 1130, 1102, 980, 970, 608

HRMS-ESI (*m/z*)

<sup>12</sup> The stereochemistry was confirmed by NOESY experiments.

[M+Na]<sup>+</sup> calcd. for C<sub>11</sub>H<sub>11</sub>F<sub>6</sub>NO<sub>2</sub>, 326.0587; found, 326.0581

#### 4-Methyl-N-(4,4,4-trifluoro-2-(trifluoromethyl)butyl)benzenesulfonamide (2h)

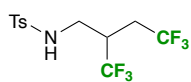

The reaction was carried out on according to general procedure. The target compound was obtained as a white solid (47 mg, 68% yield) after silica gel column chromatography (CH<sub>2</sub>Cl<sub>2</sub>).

<sup>1</sup>H NMR (400 MHz, CDCl<sub>3</sub>)

2.33–2.52 (m, 2H), 2.44 (s, 3H), 2.55–2.70 (m, 1H), 3.20–3.32 (m, 2H), 4.71 (br, 1H), 7.34 (d, *J* = 8.4 Hz, 2H), 7.74 (d, *J* = 8.4 Hz, 2H)

<sup>13</sup>C NMR (100 MHz, CDCl<sub>3</sub>)

21.7, 30.1 (q, *J* = 31 Hz), 38.6 (q, *J* = 27 Hz), 40.9, 125.7 (q, *J* = 274 Hz), 126.3 (q, *J* = 277 Hz), 127.2 (2C), 130.2 (2C), 136.4, 144.4

<sup>19</sup>F NMR (376 MHz, CDCl<sub>3</sub>)

–69.9 (d, *J* = 8.6 Hz, 3F), –64.5 (t, *J* = 10.2 Hz, 3F)

IR (neat, cm<sup>-1</sup>)

3282, 1599, 1496, 1436, 1390, 1332, 1307, 1291, 1274, 1251, 1155, 1119, 1092, 815, 667

HRMS-ESI (m/z) [M+Na]<sup>+</sup> calcd. for C<sub>12</sub>H<sub>13</sub>F<sub>6</sub>NO<sub>2</sub>S, 372.0463; found, 372.0464

#### 4-Methyl-N-(4,4,5,5,5-pentafluoro-2-(perfluoroethyl)pentyl)benzenesulfonamide (2i)

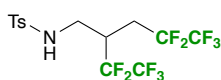

The reaction was carried out on according to general procedure. The target compound was obtained as a white solid (45 mg, 50% yield) after silica gel column chromatography (CH<sub>2</sub>Cl<sub>2</sub>).

<sup>1</sup>H NMR (400 MHz, CDCl<sub>3</sub>)

2.28–2.60 (m, 2H), 2.44 (s, 3H), 2.70–2.85 (m, 1H), 3.22–3.38 (m, 2H), 4.69 (t, *J* = 7.2 Hz, 1H), 7.34 (d, *J* = 8.4 Hz, 2H), 7.74 (d, *J* = 8.4 Hz, 2H)

<sup>13</sup>C NMR (100 MHz, CDCl<sub>3</sub>)<sup>13</sup>

21.7, 25.9 (t, *J* = 21 Hz), 34.8 (t, *J* = 21 Hz), 41.3, 127.2 (2C), 130.2 (2C), 136.3, 144.4

<sup>19</sup>F NMR (376 MHz, CDCl<sub>3</sub>)

–118.0 (m, 2F), –116.5 (m, 2F), –85.5 (s, 3F), –82.3 (s, 3F)

IR (neat, cm<sup>-1</sup>)

3304, 1339, 1307, 1195, 1162, 1093, 1069, 1043, 814, 668, 663

HRMS-ESI (m/z)

[M+Na]<sup>+</sup> calcd. for C<sub>14</sub>H<sub>13</sub>F<sub>10</sub>NO<sub>2</sub>S, 472.0400; found, 472.0400.

<sup>13</sup> The carbons of perfluoroalkyl group could not be assigned because of low intensity of signals and their complex coupling.

#### 4-Methyl-*N*-(4,4,5,5,6,6,6-heptafluoro-2-(perfluoropropyl)hexyl)benzenesulfonamide (2j)

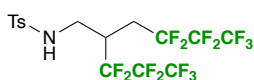

The reaction was carried out according to general procedure. The target compound was obtained as a white solid (47 mg, 43% yield) after silica gel column chromatography (CH<sub>2</sub>Cl<sub>2</sub>).

<sup>1</sup>H NMR (400 MHz, CDCl<sub>3</sub>)

2.35–2.65 (m, 2H), 2.44 (s, 3H), 2.82–2.97 (m, 1H), 3.22–3.38 (m, 2H), 4.78 (t, *J* = 7.2 Hz, 1H), 7.33 (d, *J* = 8.4 Hz, 2H), 7.73 (d, *J* = 8.4 Hz, 2H)

<sup>13</sup>C NMR (100 MHz, CDCl<sub>3</sub>)<sup>13</sup>

21.7, 25.8 (t, *J* = 21 Hz), 35.1 (t, *J* = 21 Hz), 41.3, 127.2 (2C), 130.1 (2C), 136.2, 144.4

<sup>19</sup>F NMR (376 MHz, CDCl<sub>3</sub>)

–127.5 (m, 2F), –125.0 (m, 2F), –114.9 (m, 2F), –113.2 (m, 2F), –80.4 (s, 3F), –80.3 (s, 3F)

IR (neat, cm<sup>–1</sup>)

3296, 1436, 1330, 1123, 1176, 1158, 1107, 1081, 922, 814, 746, 714

HRMS-ESI (*m/z*)

[*M*+Na]<sup>+</sup> calcd. for C<sub>16</sub>H<sub>13</sub>F<sub>14</sub>NO<sub>2</sub>S, 572.0336; found, 572.0336.

#### (*E*)-1-bromo-2-(1,1,1,4,4,4-hexafluorobuten-2-yl)benzene (5a)

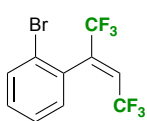

The reaction was carried out according to general procedure. The target compound was obtained as a colorless oil (28 mg, 42% yield) after silica gel column chromatography (pentane).

<sup>1</sup>H NMR (400 MHz, CDCl<sub>3</sub>)

6.58 (qq, *J* = 7.0, 1.4 Hz, 1H), 7.22 (dd, *J* = 7.5, 1.9 Hz, 1H), 7.31 (td, *J* = 7.7, 1.9 Hz, 1H), 7.38 (dt, *J* = 7.5, 1.3 Hz, 1H), 7.66 (dd, *J* = 7.7, 1.3 Hz, 1H)

<sup>13</sup>C NMR (100 MHz, CDCl<sub>3</sub>)

121.3 (q, *J* = 271 Hz), 121.6 (q, *J* = 275), 123.3, 124.6 (qq, *J* = 35, 6 Hz), 127.3, 130.3, 130.6, 131.3, 133.2, 139.4 (qq, *J* = 32, 6 Hz)

<sup>19</sup>F NMR (376 MHz, CDCl<sub>3</sub>)

–67.8 (d, *J* = 1.4 Hz, 3F), –60.6 (m, 3F)

IR (neat, cm<sup>–1</sup>)

1269, 1187, 1145, 756, 738, 663, 646, 613

HRMS-EI (*m/z*)

[*M*] calcd. for C<sub>10</sub>H<sub>5</sub>BrF<sub>6</sub>, 317.9479; found, 317.9476

**(E)-1-bromo-2-(1,1,1,2,2,5,5,6,6,6-decafluorohexen-3-yl)benzene (5b)**

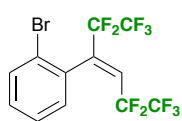

The reaction was carried out on according to general procedure. The target compound was obtained as a colorless oil (38 mg, 45% yield) after silica gel column chromatography (pentane).

$^1\text{H}$  NMR (400 MHz,  $\text{CDCl}_3$ )

6.49 (t,  $J = 12.8$  Hz, 1H), 7.15 (m, 1H), 7.30 (td,  $J = 7.7, 1.9$  Hz, 1H), 7.35 (td,  $J = 7.5, 1.4$  Hz, 1H), 7.67 (dd,  $J = 7.7, 1.4$  Hz, 1H)

$^{13}\text{C}$  NMR (100 MHz,  $\text{CDCl}_3$ )<sup>13</sup>

123.8, 125.2 (m), 127.0, 130.5, 130.7, 131.3, 133.0, 141.9 (m)

$^{19}\text{F}$  NMR (376 MHz,  $\text{CDCl}_3$ )

-117.11 (d,  $J = 268$  Hz, 1F), -114.88 (dd,  $J = 275, 14$  Hz, 1F), -113.17 (dd,  $J = 275, 11$  Hz, 1F), -110.60 (d,  $J = 268$  Hz, 1F), -82.28 (d,  $J = 6.2$  Hz, 3F), -84.76 (d,  $J = 6.7$  Hz, 3F)

IR (neat,  $\text{cm}^{-1}$ )

1327, 1120, 1168, 1130, 1065, 1048, 1034, 753, 744, 721, 707, 666, 658

HRMS-EI ( $m/z$ )

[M] calcd. for  $\text{C}_{12}\text{H}_5\text{BrF}_{10}$ , 417.9415; found, 417.9403

**(E)-1-bromo-2-(1,1,1,2,2,3,3,6,6,7,7,8,8,8-tetradecafluoroocten-4-yl)benzene (5c)**

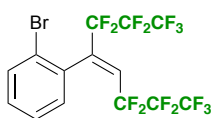

The reaction was carried out on according to general procedure. The target compound was obtained as a colorless oil (62 mg, 60% yield) after silica gel column chromatography (pentane)

$^1\text{H}$  NMR (400 MHz,  $\text{CDCl}_3$ )

6.49 (dd,  $J = 14.3, 11.8$  Hz, 1H), 7.17 (m, 1H), 7.30 (td,  $J = 7.8, 1.8$  Hz, 1H), 7.38 (dt,  $J = 7.5, 1.4$  Hz, 1H), 7.66 (dd,  $J = 7.8, 1.4$  Hz, 1H)

$^{13}\text{C}$  NMR (100 MHz,  $\text{CDCl}_3$ )<sup>13</sup>

124.0, 125.8 (m), 127.0, 130.4, 130.9, 131.3, 133.0, 142.0 (m)

$^{19}\text{F}$  NMR (376 MHz,  $\text{CDCl}_3$ )

-127.46 (m, 2F), -124.41 to -125.64 (m, 1F), -123.31 to -124.41 (m, 1F), -114.41 (m, 1F), -111.49 to -113.78 (m, 1F), -108.53 to -111.01 (m, 1F), -106.51 (m, 1F), -80.37 (m, 3F), -79.84 to -80.21 (m, 3F)

IR (neat,  $\text{cm}^{-1}$ )

1345, 1229, 1184, 1118, 988, 961, 745, 724

HRMS-EI ( $m/z$ )

[M] calcd. for  $\text{C}_{14}\text{H}_5\text{BrF}_{14}$ , 517.9351; found, 517.9336

**(E)-4-(1,1,1,4,4,4-hexafluorobuten-2-yl)benzaldehyde (5d)**

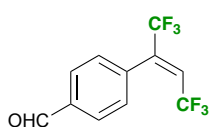

The reaction was carried out on according to general procedure. The target compound was obtained as a colorless oil (21 mg, 40% yield) after silica gel column chromatography (CH<sub>2</sub>Cl<sub>2</sub>/hexane = 20/80).

<sup>1</sup>H NMR (400 MHz, CDCl<sub>3</sub>)

6.57 (qq, *J* = 7.2, 1.5 Hz, 1H), 7.48 (d, *J* = 8.2 Hz, 2H), 7.96 (d, *J* = 8.2 Hz, 2H), 10.07 (s, 1H)

<sup>13</sup>C NMR (100 MHz, CDCl<sub>3</sub>)

121.3 (q, *J* = 272 Hz), 121.7 (q, *J* = 275 Hz), 123.9 (qq, *J* = 35, 6 Hz), 129.7 (2C), 129.8 (2C), 134.8, 137.3, 140.2 (qq, *J* = 31, 5 Hz), 191.5

<sup>19</sup>F NMR (376 MHz, CDCl<sub>3</sub>)

-67.9 (s, 3F), -58.1 (d, *J* = 7.2 Hz, 3F)

IR (neat, cm<sup>-1</sup>)

1710, 1267, 1185, 1140, 825, 740, 649, 634, 623

HRMS-EI (*m/z*)

[M] calcd. for C<sub>11</sub>H<sub>6</sub>F<sub>6</sub>O, 268.0323; found, 268.0310

**(E)-N-(4-(1,1,1,4,4,4-hexafluorobuten-2-yl)phenyl)acetamide (5e)**

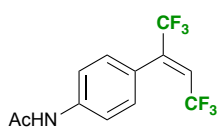

The reaction was carried out on according to general procedure. The target compound was obtained as a white solid (29 mg, 48% yield) after silica gel column chromatography (AcOEt/hexane = 30/70).

<sup>1</sup>H NMR (400 MHz, acetone-*d*<sub>6</sub>)

2.10 (s, 3H), 6.84 (qq, *J* = 7.2, 1.5 Hz, 1H), 7.29 (d, *J* = 8.6 Hz, 2H), 7.77 (d, *J* = 8.6 Hz, 2H), 9.37 (bs, 1H)

<sup>13</sup>C NMR (100 MHz, acetone-*d*<sub>6</sub>)

24.3, 119.5 (2C), 121.5 (q, *J* = 271 Hz), 123.1 (q, *J* = 274 Hz), 123.9 (qq, *J* = 35, 5.5 Hz), 130.2 (2C), 141.6 (qq, *J* = 31, 5 Hz), 142.1, 169.3

<sup>19</sup>F NMR (376 MHz, acetone-*d*<sub>6</sub>)

-68.7 (s, 3F), -58.6 (d, *J* = 7.2 Hz, 3F)

IR (neat, cm<sup>-1</sup>)

1671, 1606, 1543, 1538, 1515, 1403, 1321, 1269, 1199, 1136

HRMS-ESI (*m/z*)

[M+Na]<sup>+</sup> calcd. for C<sub>12</sub>H<sub>9</sub>F<sub>6</sub>NO, 320.0481; found: 320.0479.



**(E)-1-(1,1,1,4,4,4-hexafluorobuten-2-yl)-4-methoxybenzene (5f)**

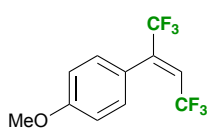

The reaction was carried out on according to general procedure. The target compound was obtained as a colorless oil (9 mg, 15% yield) after silica gel column chromatography (hexane).

$^1\text{H}$  NMR (400 MHz,  $\text{CDCl}_3$ )

3.84 (s, 3H), 6.45 (qq,  $J = 7.2, 1.4$  Hz, 1H), 6.94 (d,  $J = 8.8$  Hz, 2H), 7.23 (d,  $J = 8.8$  Hz, 2H)

$^{13}\text{C}$  NMR (100 MHz,  $\text{CDCl}_3$ )

55.4, 114.0 (2C), 121.0, 121.7 (q,  $J = 272$  Hz), 122.1 (q,  $J = 276$  Hz), 122.6 (qq,  $J = 35, 5$  Hz), 130.3 (2C), 141.2 (qq,  $J = 31, 5$  Hz), 160.9

$^{19}\text{F}$  NMR (376 MHz,  $\text{CDCl}_3$ )

-68.2 (s, 3F), -57.9 (d,  $J = 7.2$  Hz, 3F)

IR (neat,  $\text{cm}^{-1}$ )

2956, 2923, 2853, 1734, 1730, 1654, 1632, 1468, 1287, 1263, 1222, 1183, 1163, 1135, 808, 722

HRMS-EI ( $m/z$ )

[M] calcd. for  $\text{C}_{11}\text{H}_8\text{F}_6\text{O}$ , 270.0479; found, 270.0475

**(E)-4-(1,1,1,2,2,5,5,6,6,6-decafluorohexen-3-yl)benzyl 2,2,3,3,3-pentafluoropropoate (5g)**

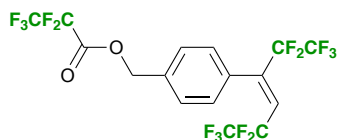

The reaction of (4-ethynylphenyl)methane **4e** was carried out on according to general procedure. The target compound was obtained as a colorless oil (56 mg, 54% yield) after silica gel column chromatography ( $\text{CH}_2\text{Cl}_2/\text{hexane} = 5/95$ ).

$^1\text{H}$  NMR (400 MHz,  $\text{CDCl}_3$ )

5.42 (s, 2H), 6.47 (t,  $J = 13.0$  Hz, 1H), 7.28 (d,  $J = 8.2$  Hz, 2H), 7.41 (d,  $J = 8.2$  Hz, 2H)

$^{13}\text{C}$  NMR (100 MHz,  $\text{CDCl}_3$ )<sup>13</sup>

69.0, 123.9 (m), 127.9 (2C), 129.7 (2C), 129.9, 135.1, 142.3 (m), 158.4 (t,  $J = 30$  Hz)

$^{19}\text{F}$  NMR (376 MHz,  $\text{CDCl}_3$ )

-121.5 (s, 2F), -115.0 (s, 2F), -110.9 (dd,  $J = 13.0, 2.9$  Hz, 2F), -85.0 (s, 3F), -82.8 (s, 3F), -81.7 (s, 3F)

IR (neat,  $\text{cm}^{-1}$ )

1784, 1331, 1302, 1120, 1150, 1129, 1063, 1034, 746, 713, 664

HRMS-EI ( $m/z$ )

[M] calcd. for  $\text{C}_{16}\text{H}_7\text{F}_{15}\text{O}_2$ , 516.0207; found, 516.0173

### (1,1,1,4,4,4-hexafluoro-3-methylbuten-2-yl)benzene (**5h**)<sup>14</sup>

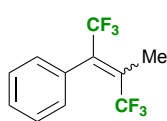

The reaction was carried out according to general procedure. After the extraction, the organic phase was very carefully evaporated because of high volatility of the product (200 mmHg, 20 °C). The target compound was identified by <sup>1</sup>H and <sup>19</sup>F NMR analyses, and the <sup>19</sup>F NMR yield was estimated (Figure S6, 46% yield, *E*:*Z* = 67:33).

#### *E*-isomer

<sup>1</sup>H NMR (400 MHz, CDCl<sub>3</sub>)

2.18–2.22 (m, 3H), 7.13–7.20 (m, 2H), 7.30–7.42 (m, 3H)

<sup>19</sup>F NMR (376 MHz, CDCl<sub>3</sub>)

–61.7 (s, 3F), –59.3 (s, 3F)

#### *Z*-isomer

<sup>1</sup>H NMR (400 MHz, CDCl<sub>3</sub>)

1.75 (q, *J* = 2.2 Hz, 3H), 7.16–7.19 (m, 2H), 7.41–7.46 (m, 3H)

<sup>19</sup>F NMR (376 MHz, CDCl<sub>3</sub>)

–62.1 (q, *J* = 14.5 Hz, 3F), –58.7 (q, *J* = 14.5 Hz, 3F)

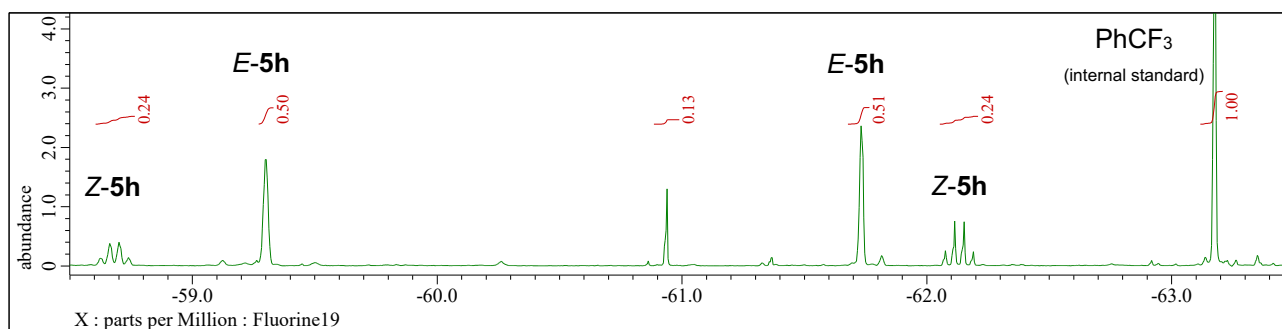

Figure S2. <sup>19</sup>F NMR analysis of the crude product.

### *N*-(4-(1,1,1,4,4,4-hexafluoro-3-methylbuten-2-yl)phenyl)-*N*-methylacetamide (**5i**)<sup>15</sup>

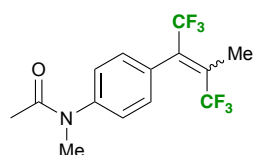

The reaction was carried out according to general procedure. The target compound was obtained after silica gel column chromatography (AcOEt/hexane = 60/40).

*E*-isomer: white solid, 19 mg, 29% yield

<sup>14</sup> The stereochemistry was analogously determined by comparing the chemical shifts and coupling patterns of the <sup>19</sup>F NMR spectra of **5h** and **5i**; a unique F–F coupling was observed only in the case of the *Z*-isomer.

<sup>15</sup> The stereochemistry was determined by NOESY experiments; only the *Z*-isomer showed a correlation between the aromatic proton and methyl proton on the double bond.

<sup>1</sup>H NMR (400 MHz, CDCl<sub>3</sub>)

1.88 (s, 3H), 2.22 (q, *J* = 2.4 Hz, 3H), 3.29 (s, 3H), 7.19–7.25 (m, 4H)

<sup>13</sup>C NMR (100 MHz, CDCl<sub>3</sub>)

14.5, 22.5, 37.2, 122.7 (q, *J* = 277 Hz), 122.9 (q, *J* = 277 Hz), 127.0 (2C), 130.5 (2C), 131.8, 135.3 (m), 135.5 (m), 145.2, 170.6

<sup>19</sup>F NMR (376 MHz, CDCl<sub>3</sub>)

–61.2 (s, 3F), –58.6 (s, 3F)

IR (neat, cm<sup>–1</sup>)

1348, 1230, 1214, 1189, 1139, 1114, 1013, 941, 897, 832, 751, 723, 698

HRMS-ESI (*m/z*)

[*M*+Na]<sup>+</sup> calcd. for C<sub>14</sub>H<sub>13</sub>F<sub>6</sub>NO, 348.0794; found: 348.0791

**Z-isomer:** colorless oil, 8 mg, 12% yield

<sup>1</sup>H NMR (400 MHz, CDCl<sub>3</sub>)

1.79 (q, *J* = 2.1 Hz, 3H), 1.92 (bs, 3H), 3.31 (s, 3H), 7.25 (d, *J* = 8.4 Hz, 2H), 7.29 (d, *J* = 8.4 Hz, 2H)

<sup>13</sup>C NMR (100 MHz, CDCl<sub>3</sub>)

17.3, 22.6, 37.3, 121.3 (q, *J* = 275 Hz), 122.2 (q, *J* = 276 Hz), 127.8 (2C), 130.3 (2C), 132.9, 135.0 (m), 135.3 (m), 145.4, 170.4

<sup>19</sup>F NMR (376 MHz, CDCl<sub>3</sub>)

–61.6 (q, *J* = 14.2 Hz, 3F), –58.0 (qd, *J* = 14.2, 2.1 Hz, 3F)

IR (neat, cm<sup>–1</sup>)

1662, 1606, 1511, 1381, 1321, 1292, 1227, 1143, 1104, 1086, 1020, 932, 712, 672

HRMS-ESI (*m/z*)

[*M*+Na]<sup>+</sup> calcd. for C<sub>14</sub>H<sub>13</sub>F<sub>6</sub>NO, 348.0794; found: 348.0794

**(*E*)-*N*-methyl-*N*-(4-(1,1,1,2,2,3,3,6,6,7,7,8,8,8-tetrafluoro-5-methylocten-4-yl)phenyl)acetamide (**5j**)<sup>16</sup>**

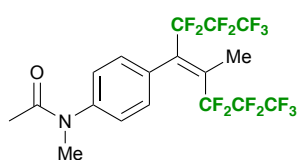

The reaction was carried out on according to general procedure. The target compound was obtained as a white solid (68 mg, 65% yield) after silica gel column chromatography (AcOEt/hexane = 60/40).

<sup>1</sup>H NMR (400 MHz, CDCl<sub>3</sub>)

1.83 (s, 3H), 2.19 (s, 3H), 3.26 (s, 3H), 7.11–7.21 (m, 4H)

<sup>16</sup> The stereochemistry was analogously determined by comparing the chemical shifts and coupling patterns of the <sup>19</sup>F NMR spectra of **5j** and the CF<sub>3</sub> analog (**5i**); a unique F–F coupling was observed only in the case of the *Z*-isomer.

$^{13}\text{C}$  NMR (100 MHz,  $\text{CDCl}_3$ )<sup>13</sup>

15.7, 22.3, 37.1, 126.2 (2C), 131.3 (2C), 131.5, 136.5 (t,  $J = 24$  Hz), 137.3 (t,  $J = 20$  Hz), 145.1, 170.5

$^{19}\text{F}$  NMR (376 MHz,  $\text{CDCl}_3$ )

-122.9 (s, 2F), -122.7 (s, 2F), -105.5 (q,  $J = 10.1$  Hz, 2F), -102.9 (q,  $J = 10.1$  Hz, 2F), -80.8 (t,  $J = 10.1$  Hz, 3F), -80.4 (t,  $J = 10.1$  Hz, 3F)

IR (neat,  $\text{cm}^{-1}$ )

1167, 1508, 1343, 1224, 1184, 1151, 1112, 1030, 955, 906, 865, 843, 749, 730, 716, 701, 668, 648

HRMS-ESI ( $m/z$ )

$[\text{M}+\text{Na}]^+$  calcd. for  $\text{C}_{18}\text{H}_{13}\text{F}_{14}\text{NO}$ , 548.0666; found: 548.0671

### (1,1,1,2,2,3,3,6,6,7,7,8,8,8-tetradecafluorooct-4-en-4,5-diyl)dibenzene (5k)<sup>17</sup>

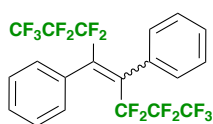

The reaction was carried out according to general procedure. The target compound was obtained after silica gel column chromatography (hexane).

**E-isomer:** white solid, 44 mg, 43%

$^1\text{H}$  NMR (400 MHz,  $\text{CDCl}_3$ )

7.31–7.44 (m, 10H)

$^{13}\text{C}$  NMR (100 MHz,  $\text{CDCl}_3$ )<sup>13</sup>

127.6 (4C), 129.2 (2C), 129.9 (4C), 131.1 (2C), 139.4 (t,  $J = 26.6$  Hz, 2C)

$^{19}\text{F}$  NMR (376 MHz,  $\text{CDCl}_3$ )

-120.2 (s, 4F), -102.0 (q,  $J = 10.1$  Hz, 4F), -80.7 (t,  $J = 10.1$  Hz, 6F)

IR (neat,  $\text{cm}^{-1}$ )

1342, 1220, 1188, 1147, 1112, 960, 720, 702

HRMS-EI ( $m/z$ )

$[\text{M}]$  calcd. for  $\text{C}_{20}\text{H}_{10}\text{F}_{14}$ , 516.0559; found, 516.0549

**Z-isomer:** colorless oil, 17 mg, 16%

$^1\text{H}$  NMR (400 MHz,  $\text{CDCl}_3$ )

6.97–7.02 (m, 4H), 7.06–7.11 (m, 6H)

$^{13}\text{C}$  NMR (100 MHz,  $\text{CDCl}_3$ )<sup>13</sup>

127.7 (4C), 128.4 (2C), 130.5 (4C), 133.5 (2C), 140.8 (q,  $J = 13.5$  Hz, 2C)

$^{19}\text{F}$  NMR (376 MHz,  $\text{CDCl}_3$ )

-119.7 (m, 4F), -102.6 (m, 4F), -80.6 (m, 6F)

<sup>17</sup> The stereochemistry was determined by the chemical shifts and unique coupling patterns in the  $^{19}\text{F}$  NMR spectra, which depend on the geometrical configuration of the two perfluoroalkyl groups on the double bond.

IR (neat,  $\text{cm}^{-1}$ )

1668, 1608, 1511, 1378, 1260, 1226, 1180, 1138, 1112, 1030, 927, 659

HRMS-EI ( $m/z$ )

[M] calcd. for  $\text{C}_{20}\text{H}_{10}\text{F}_{14}$ , 516.0559; found, 516.0548

## 4. <sup>1</sup>H and <sup>13</sup>C NMR spectra

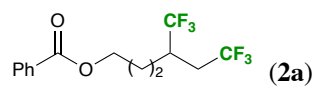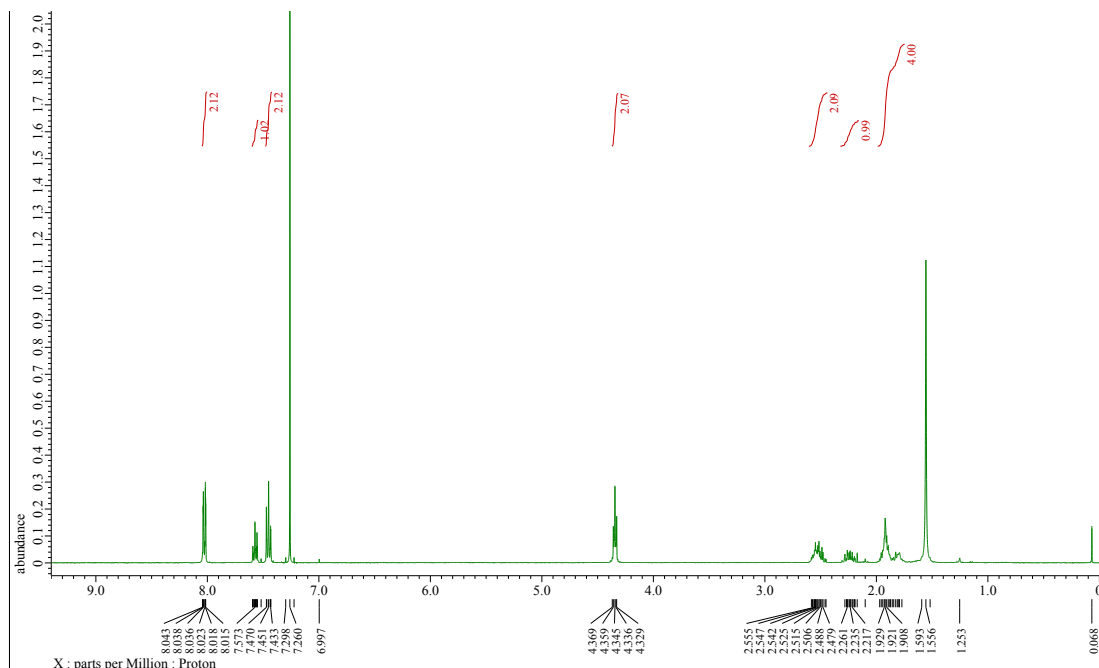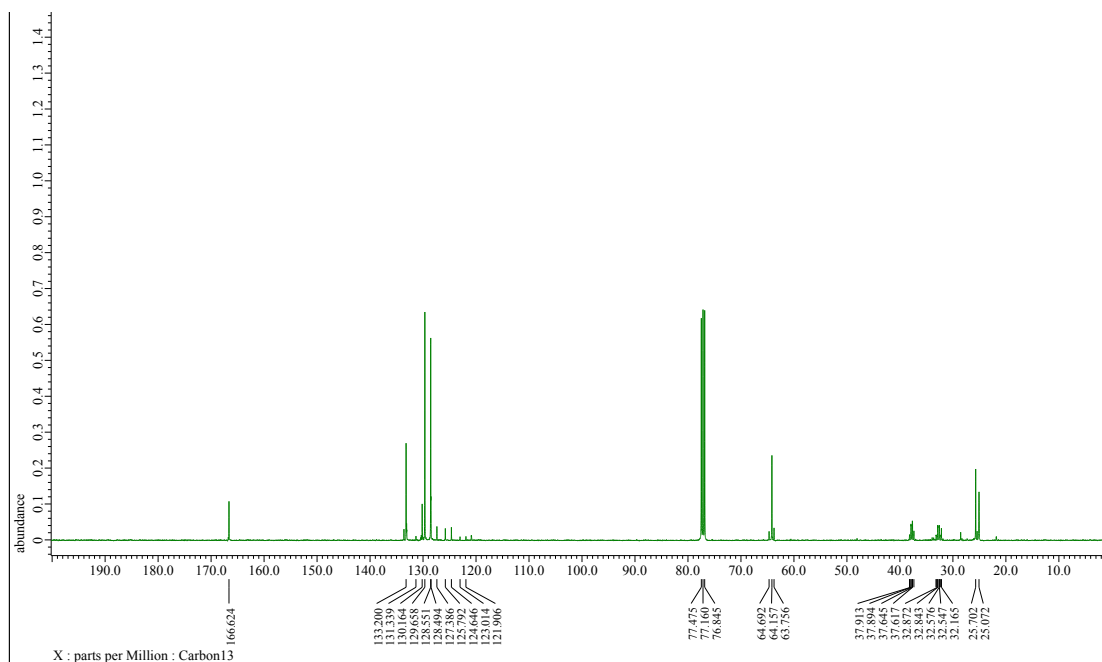

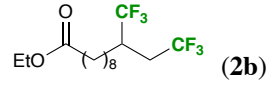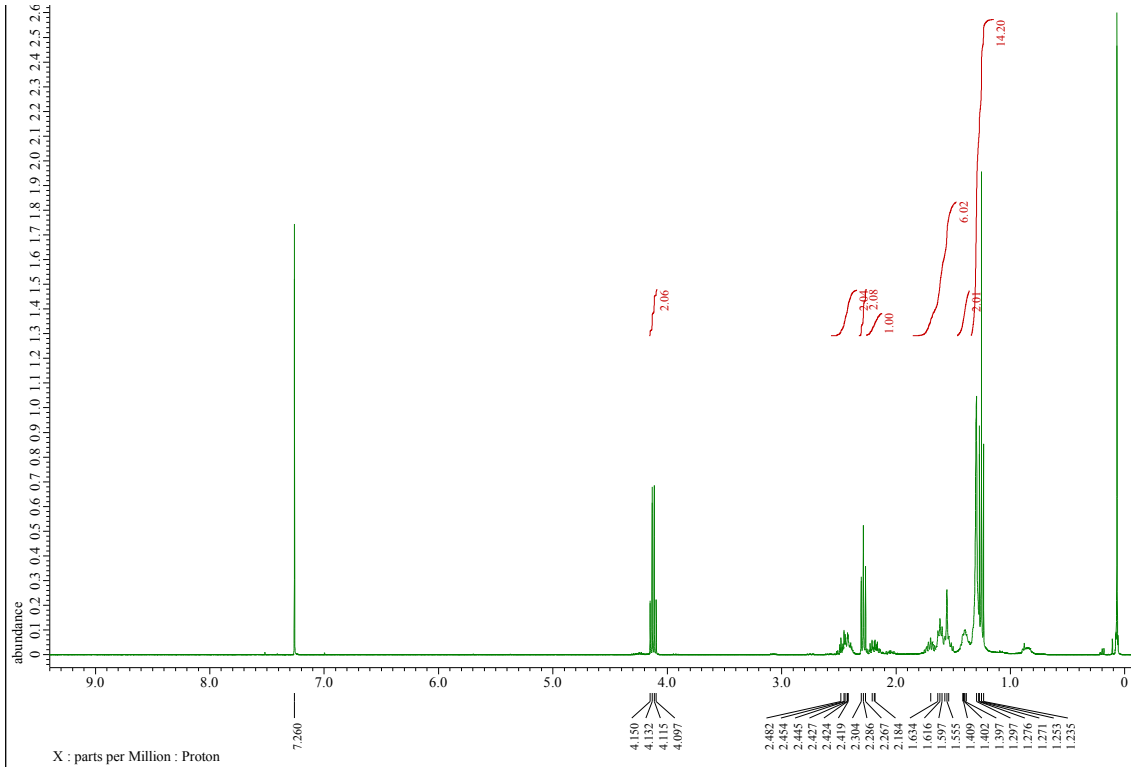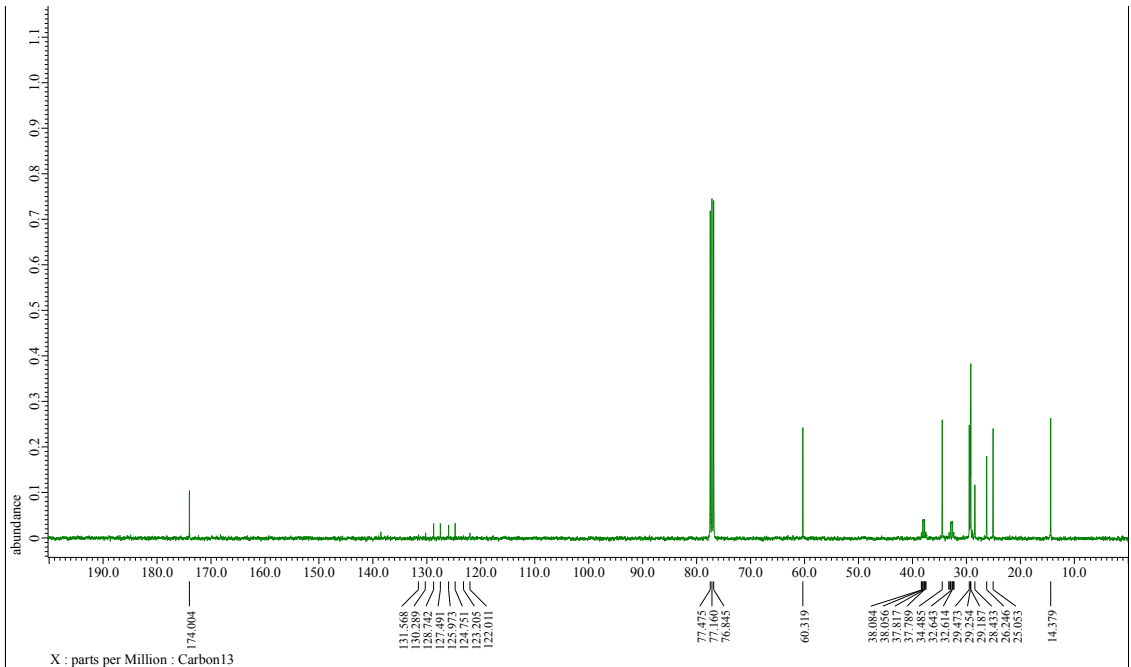

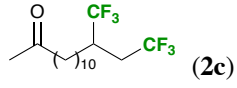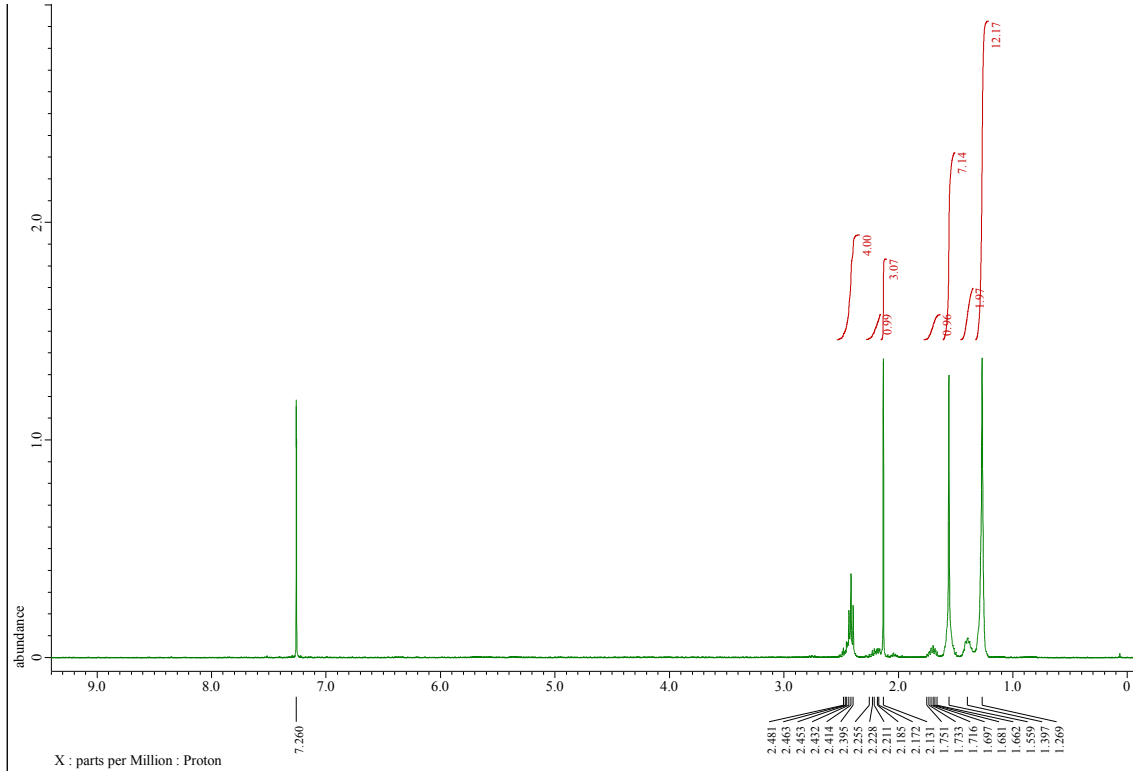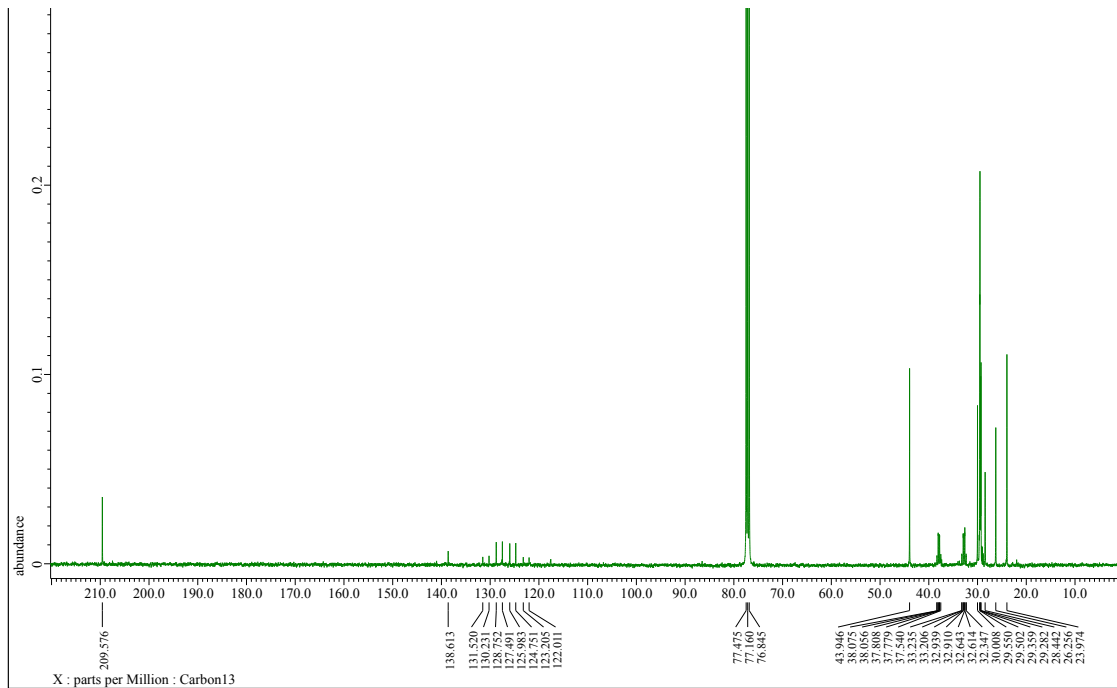



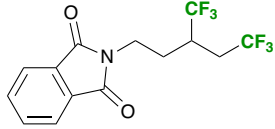

(2d)

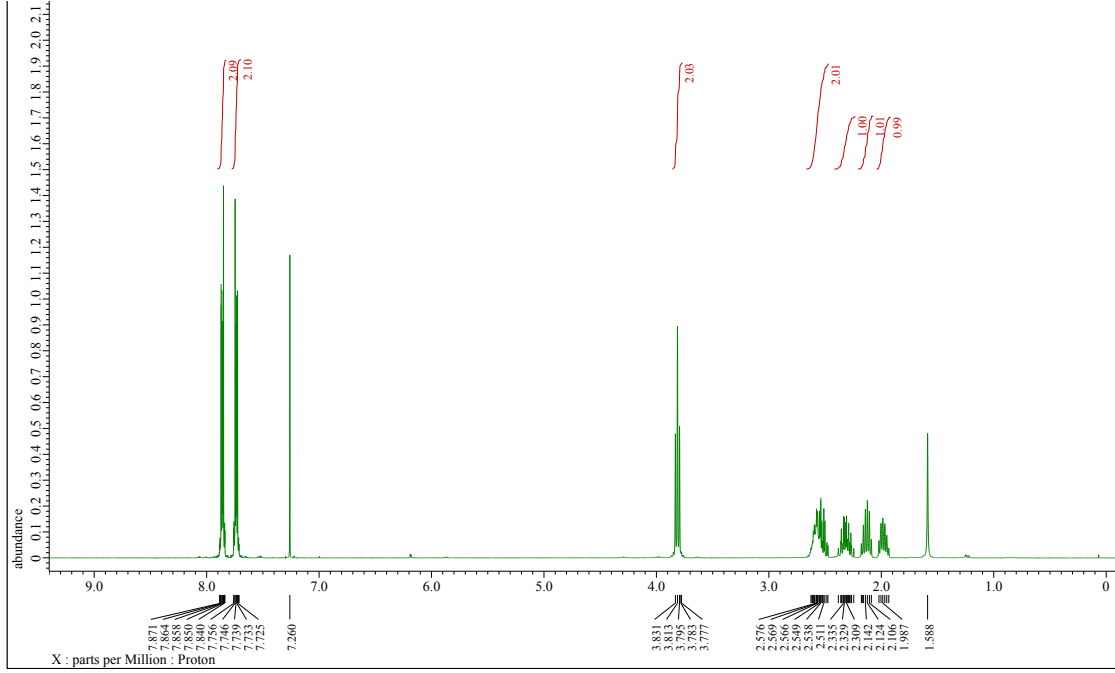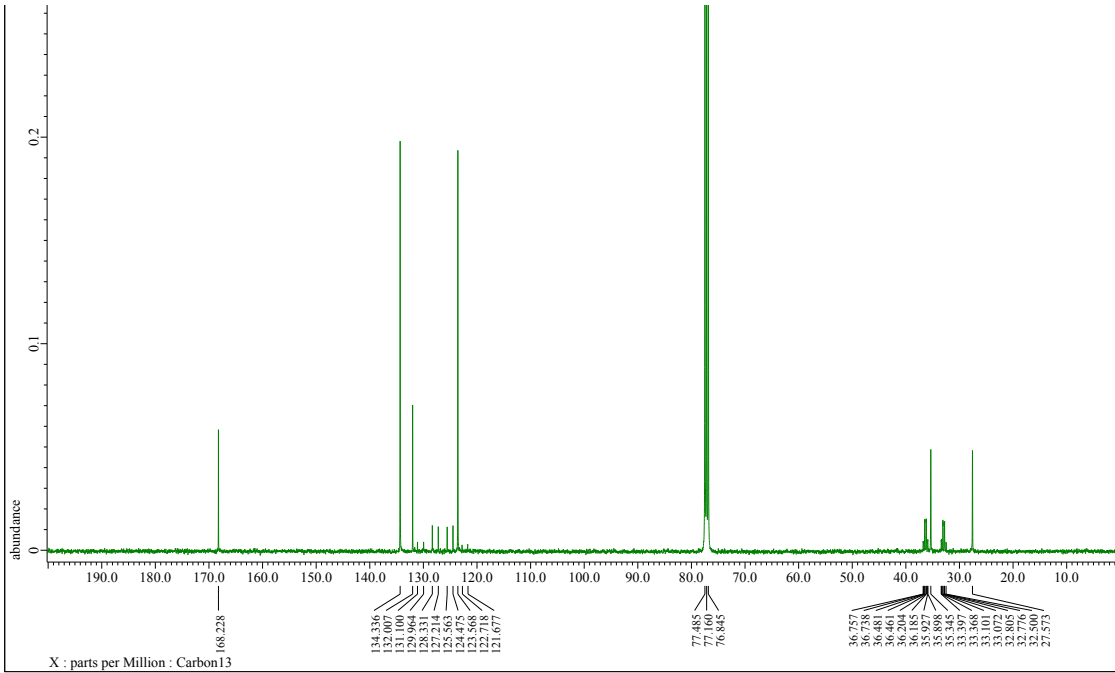

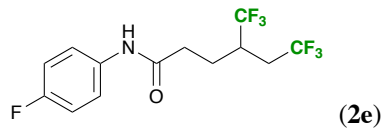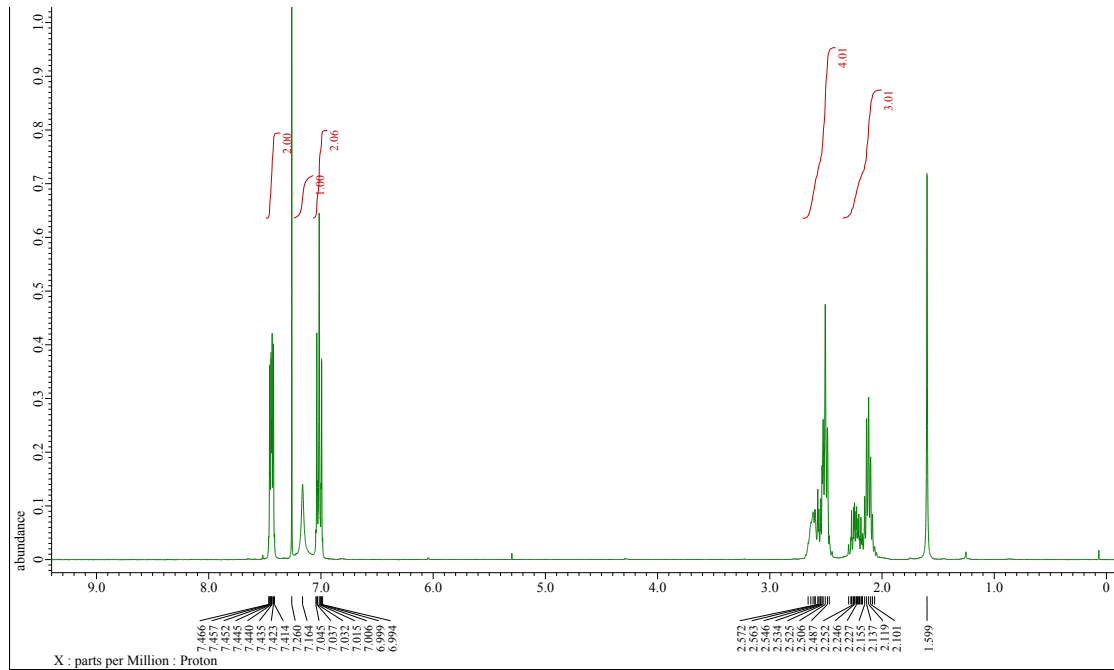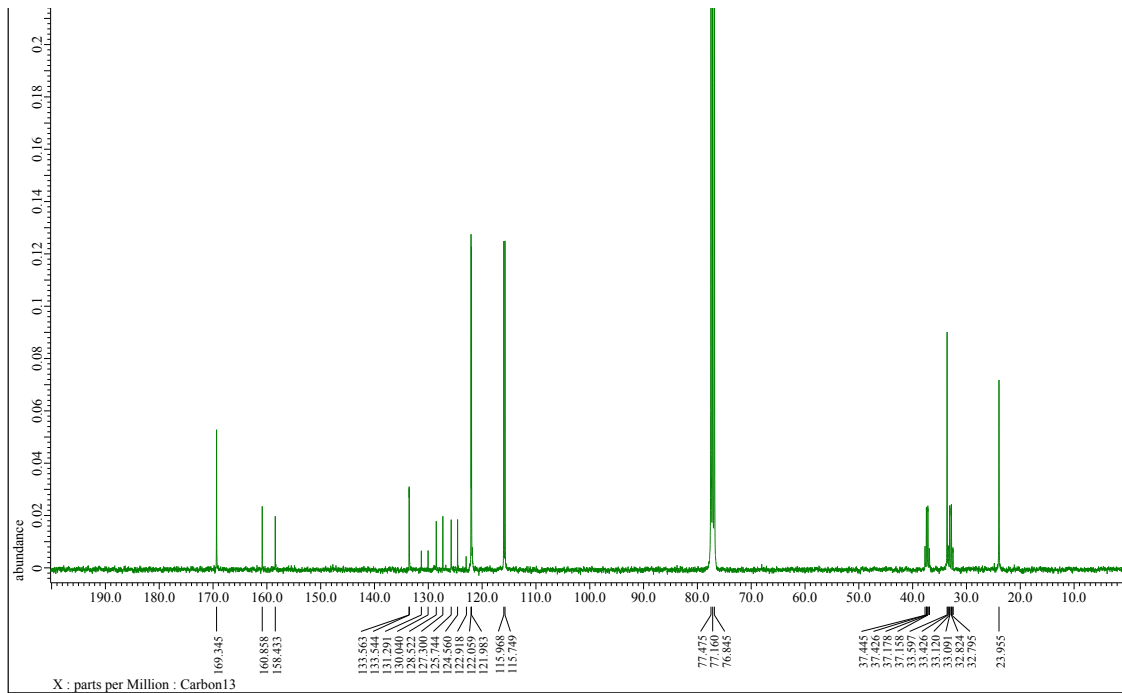

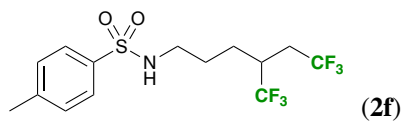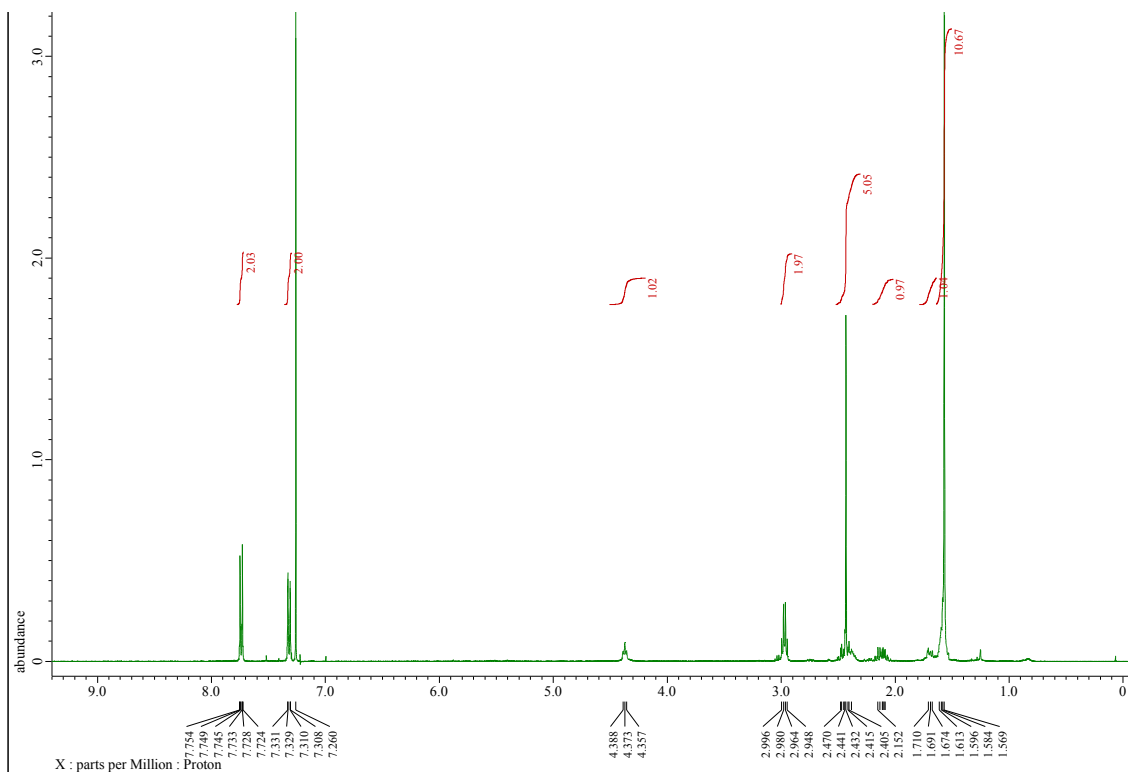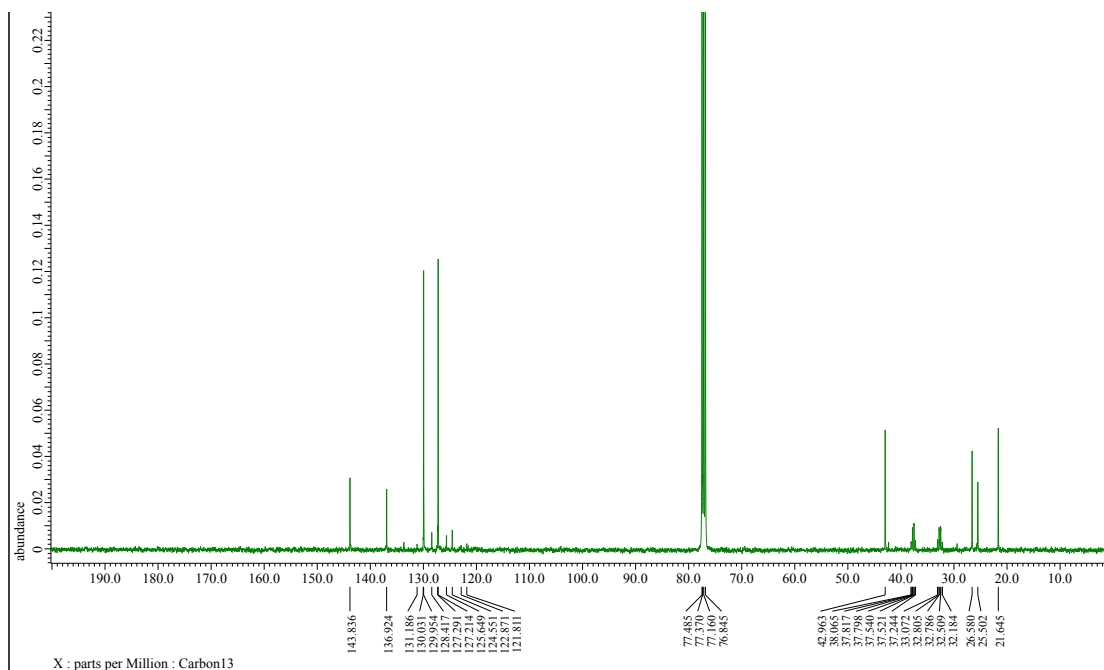

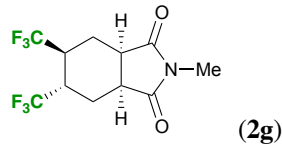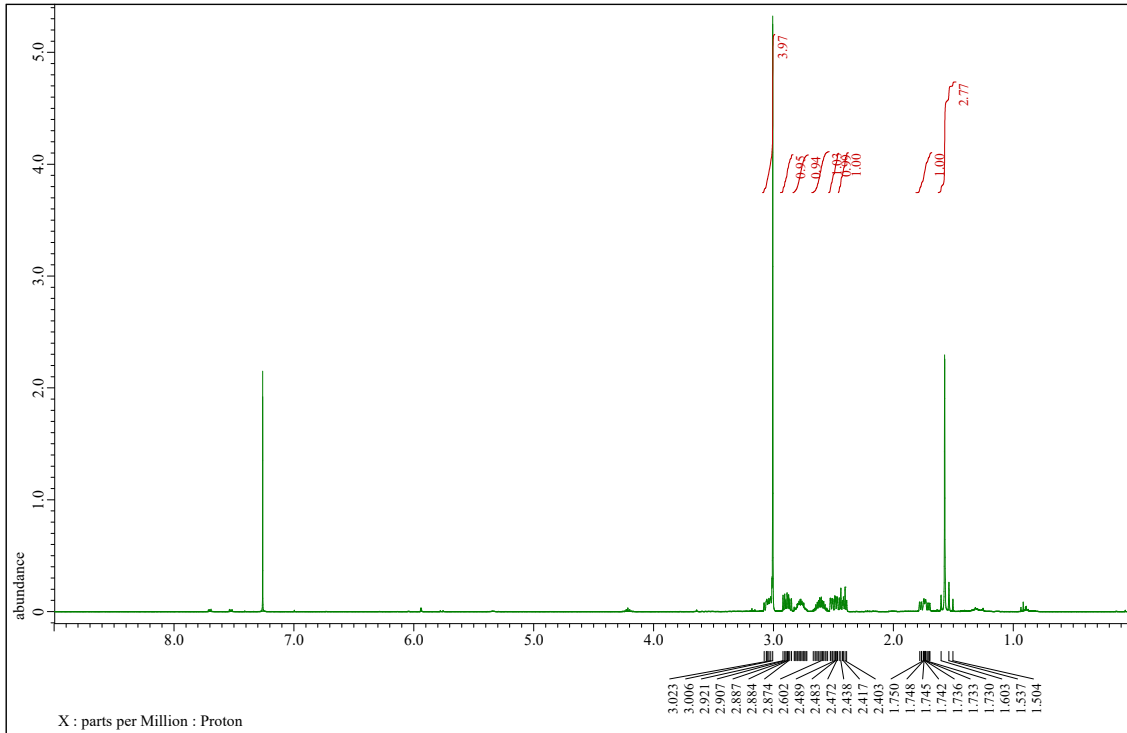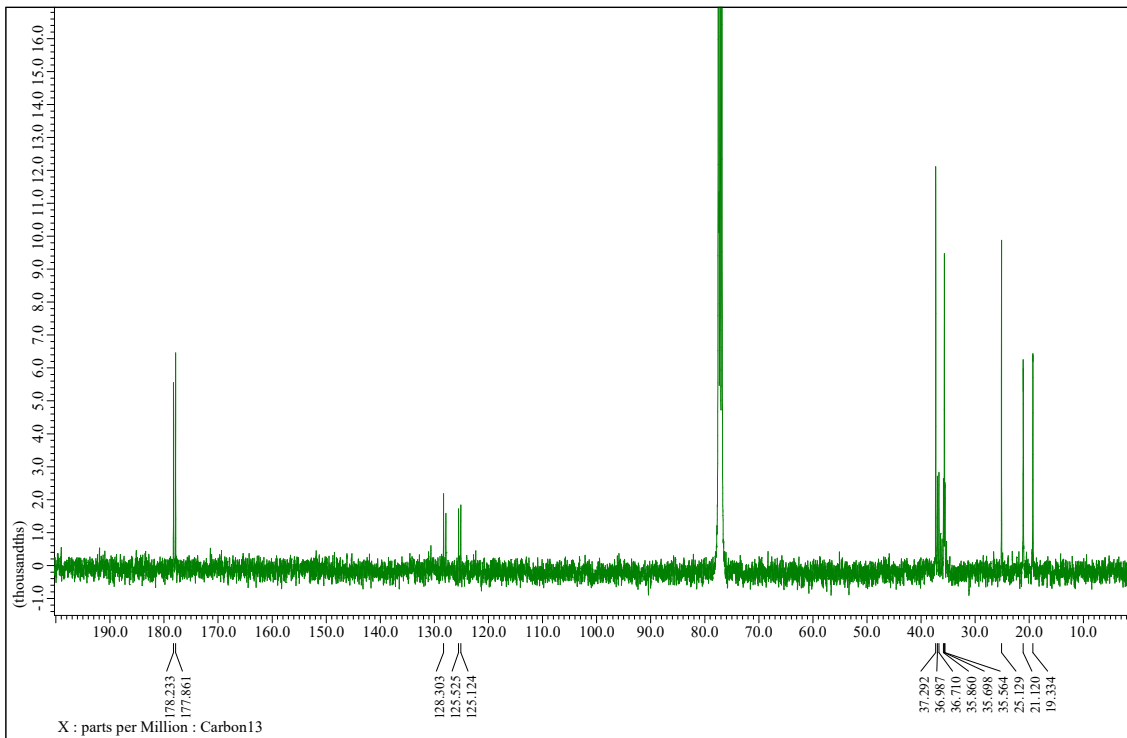

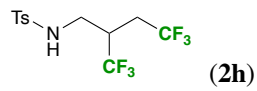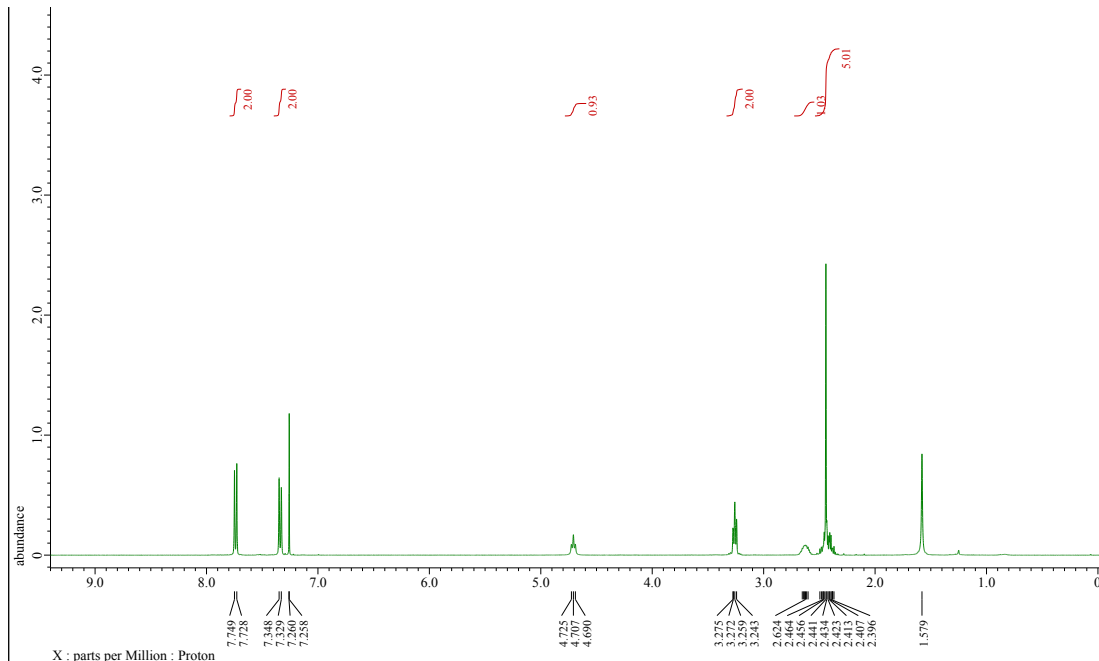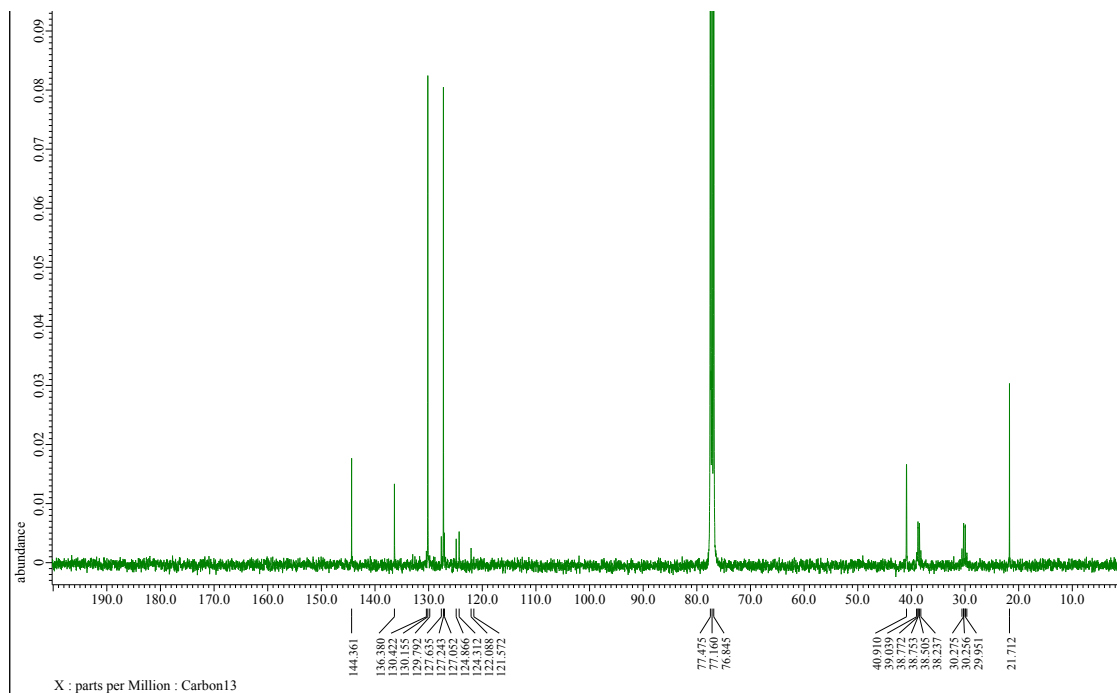

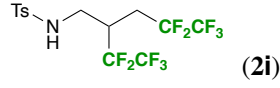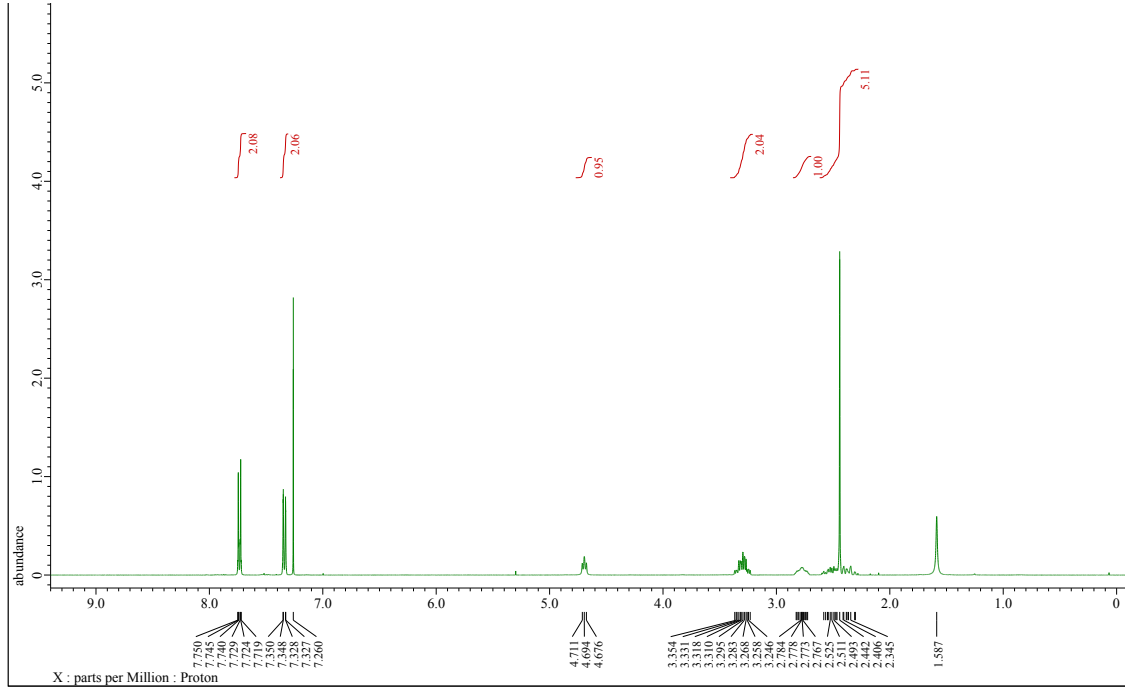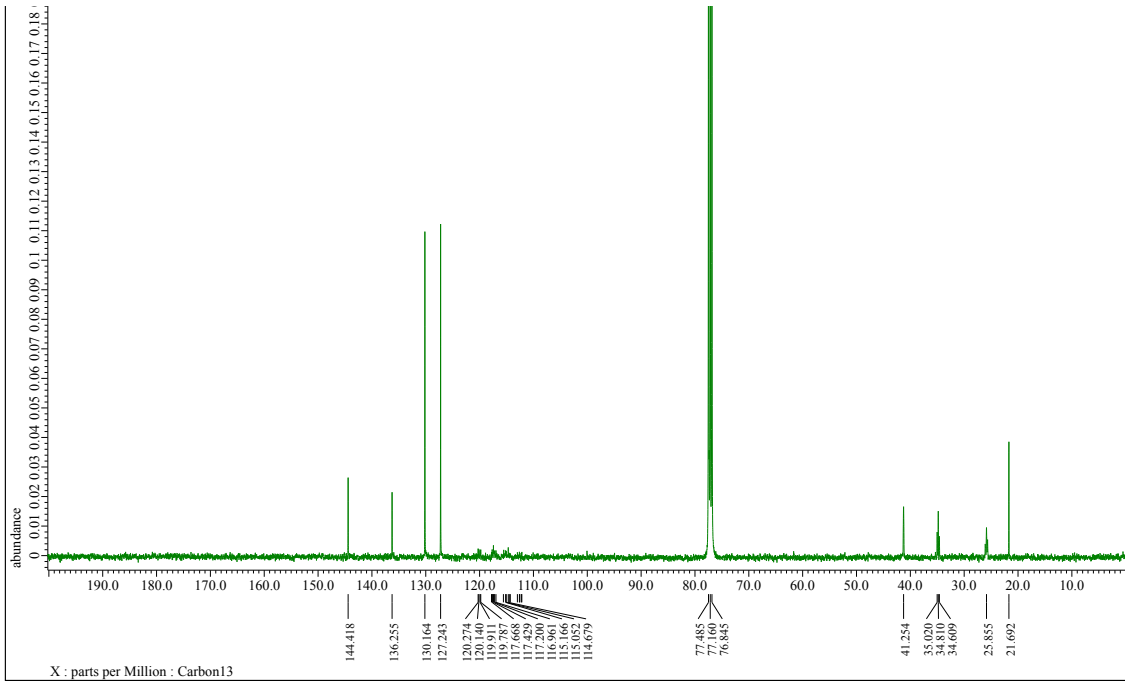

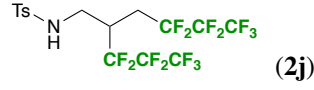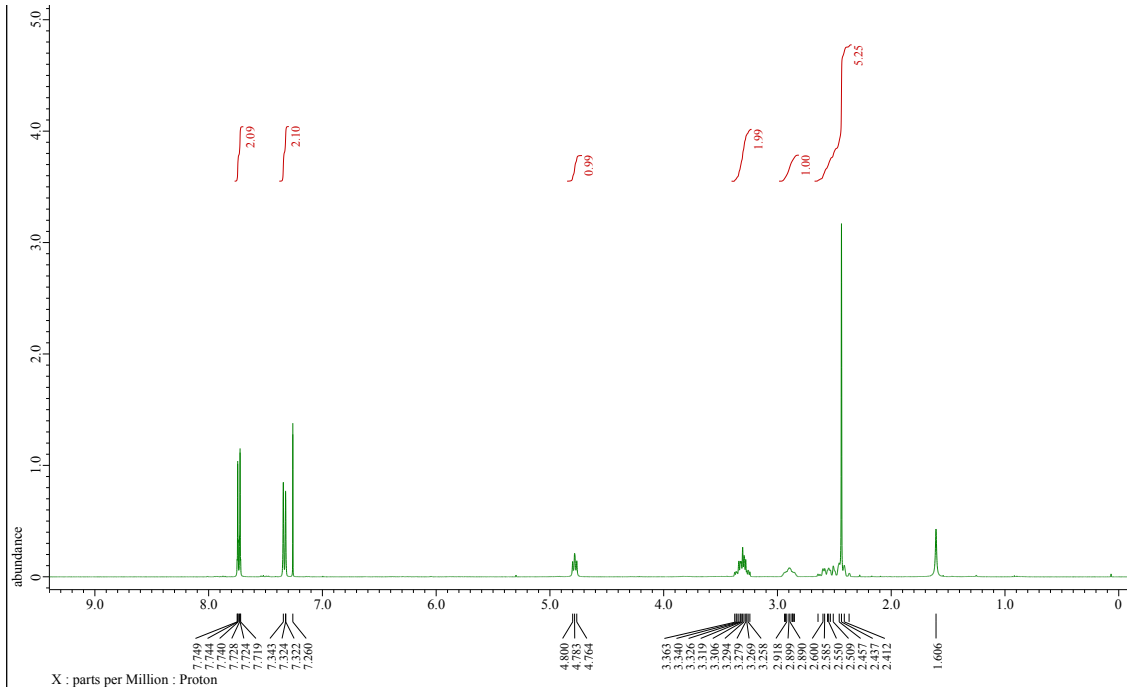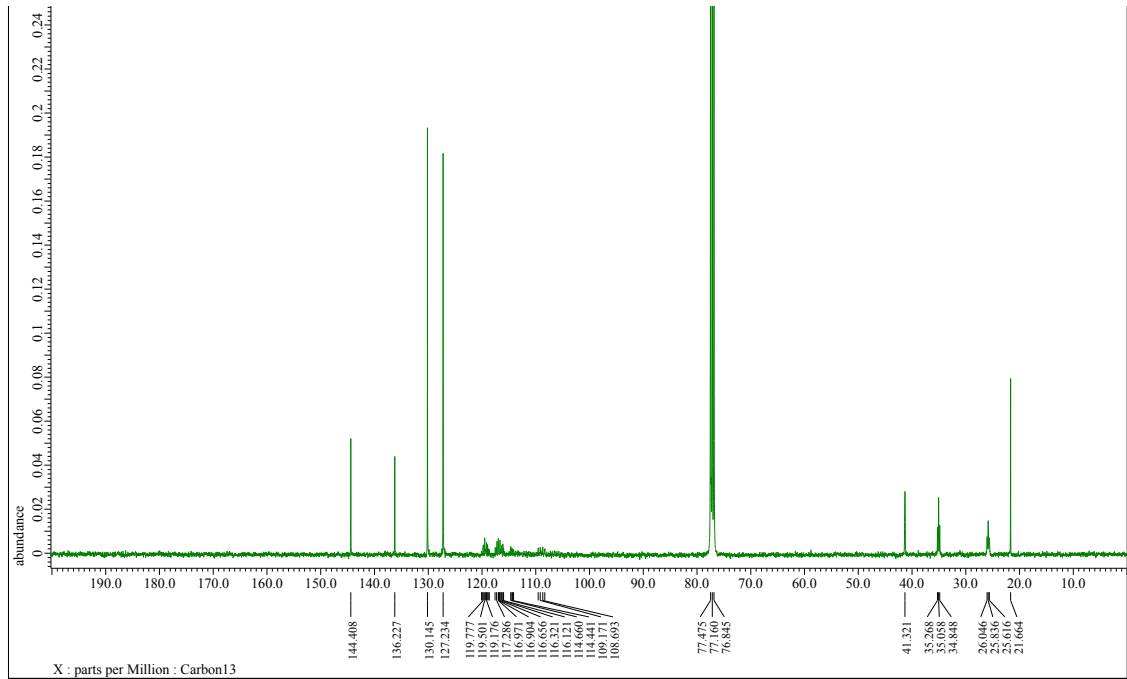

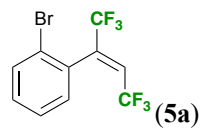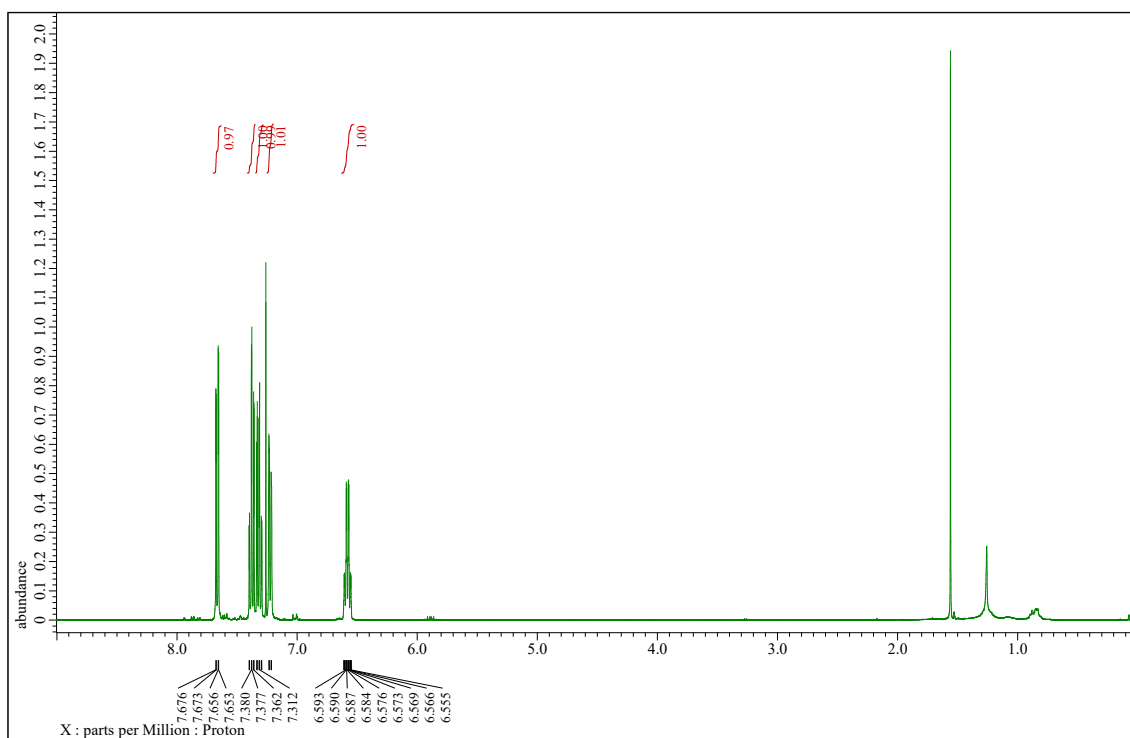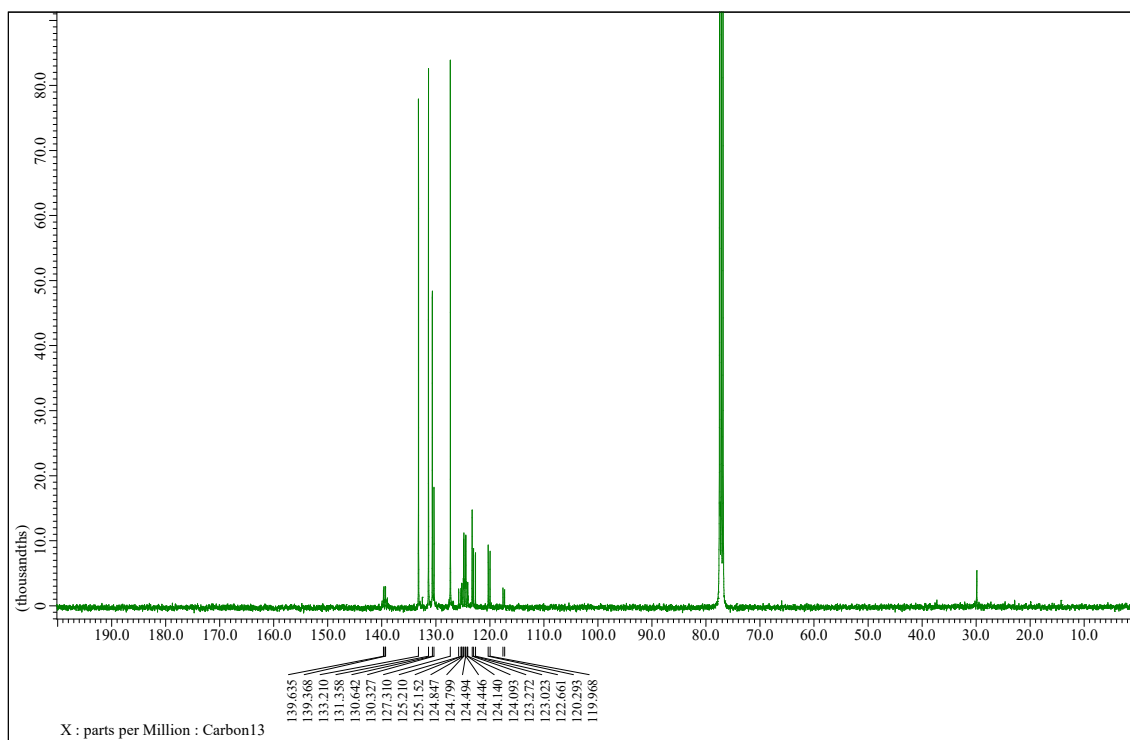



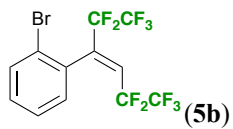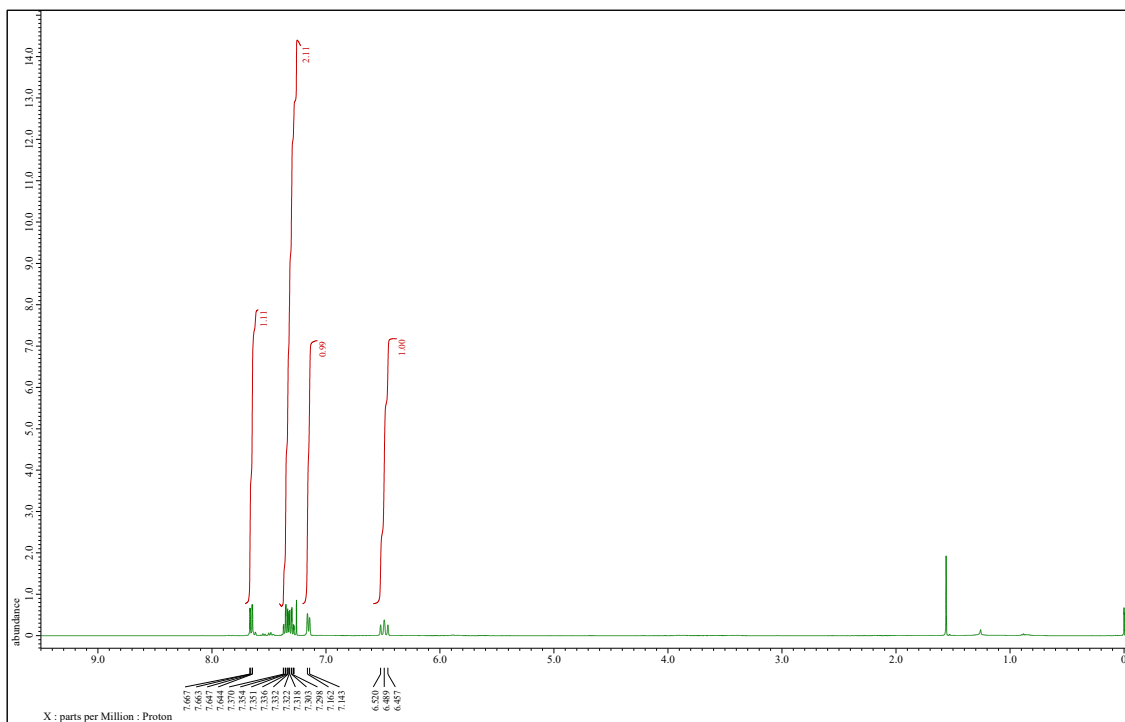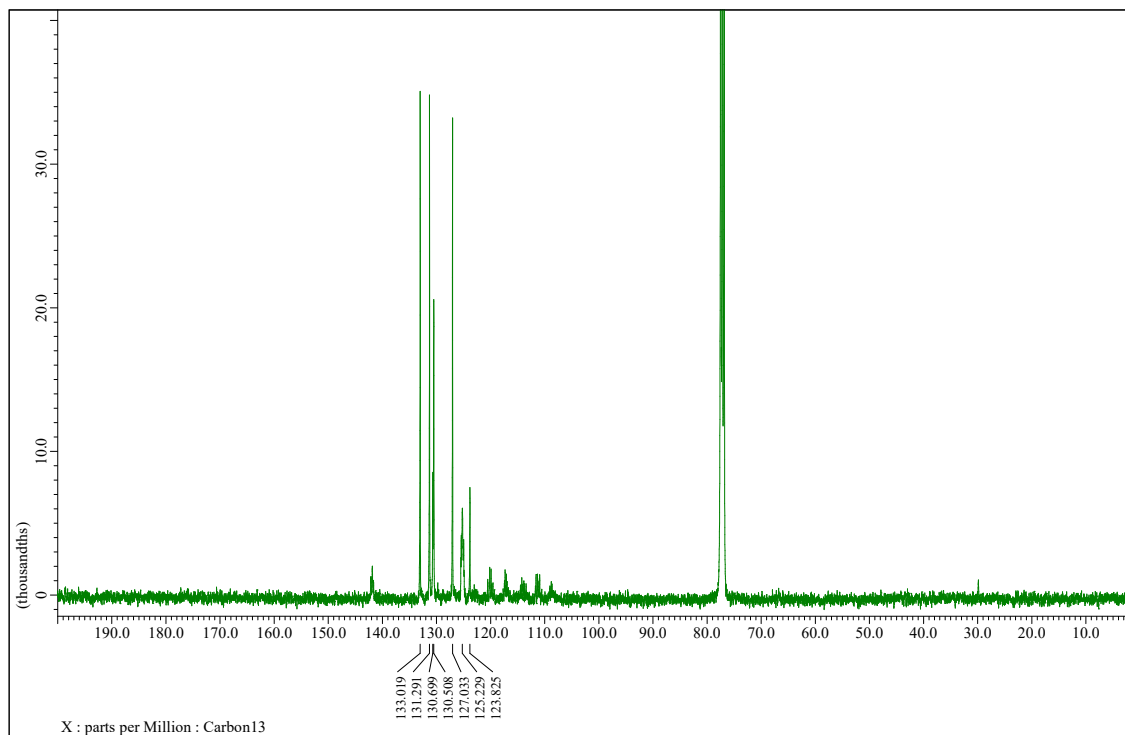

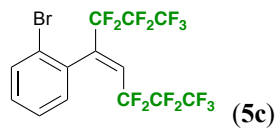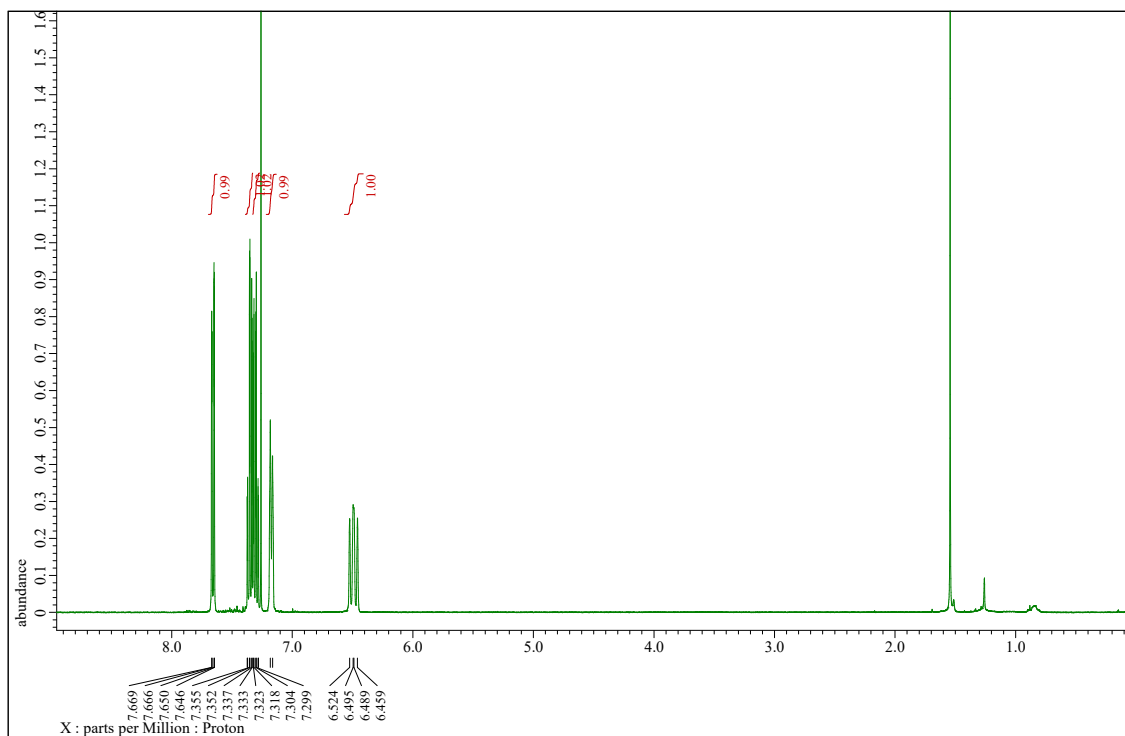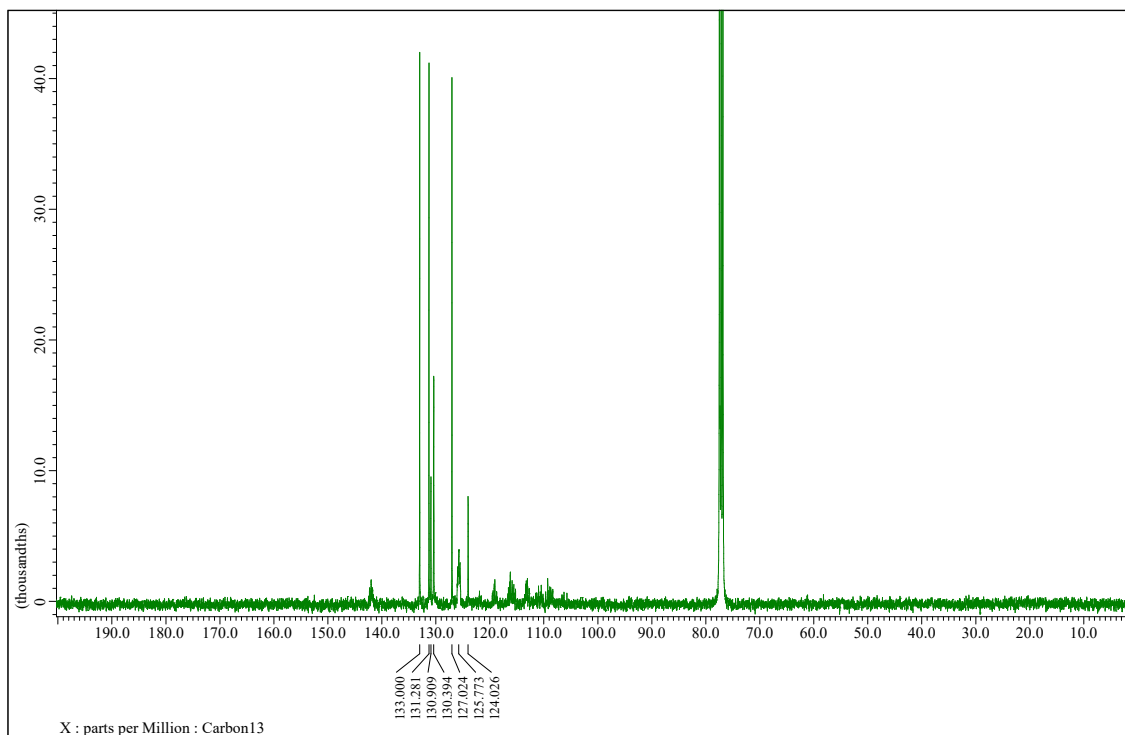

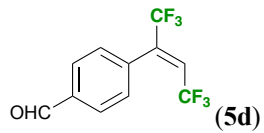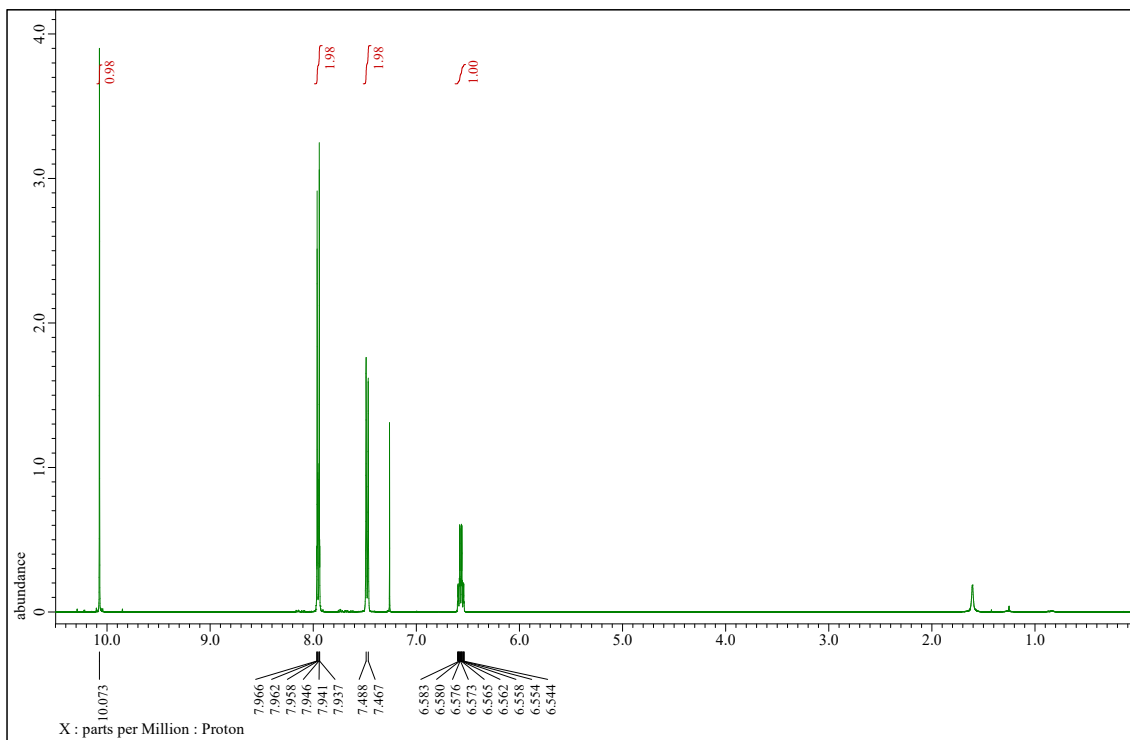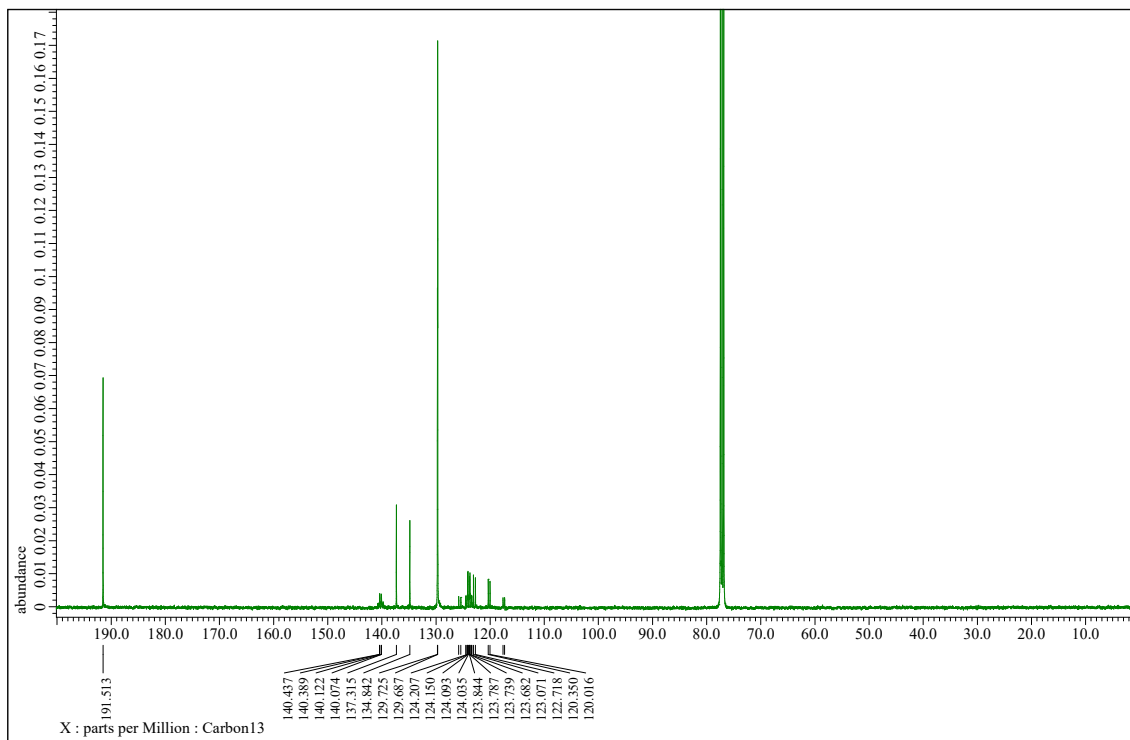

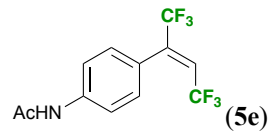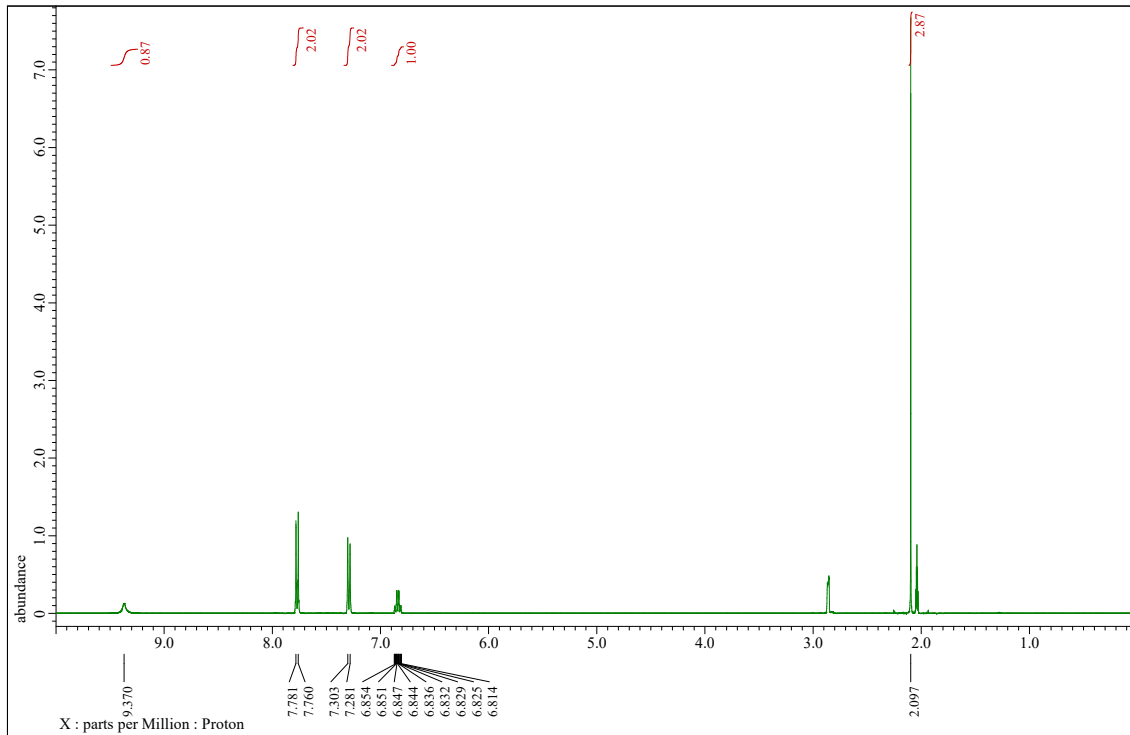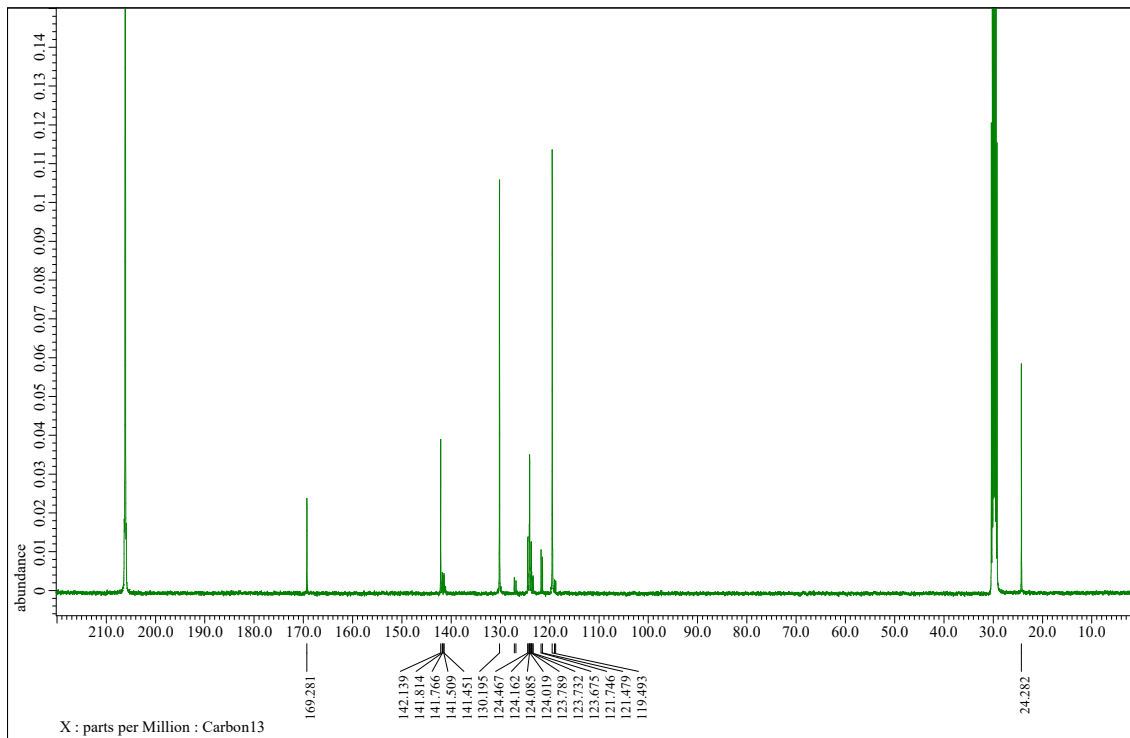

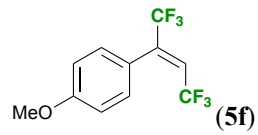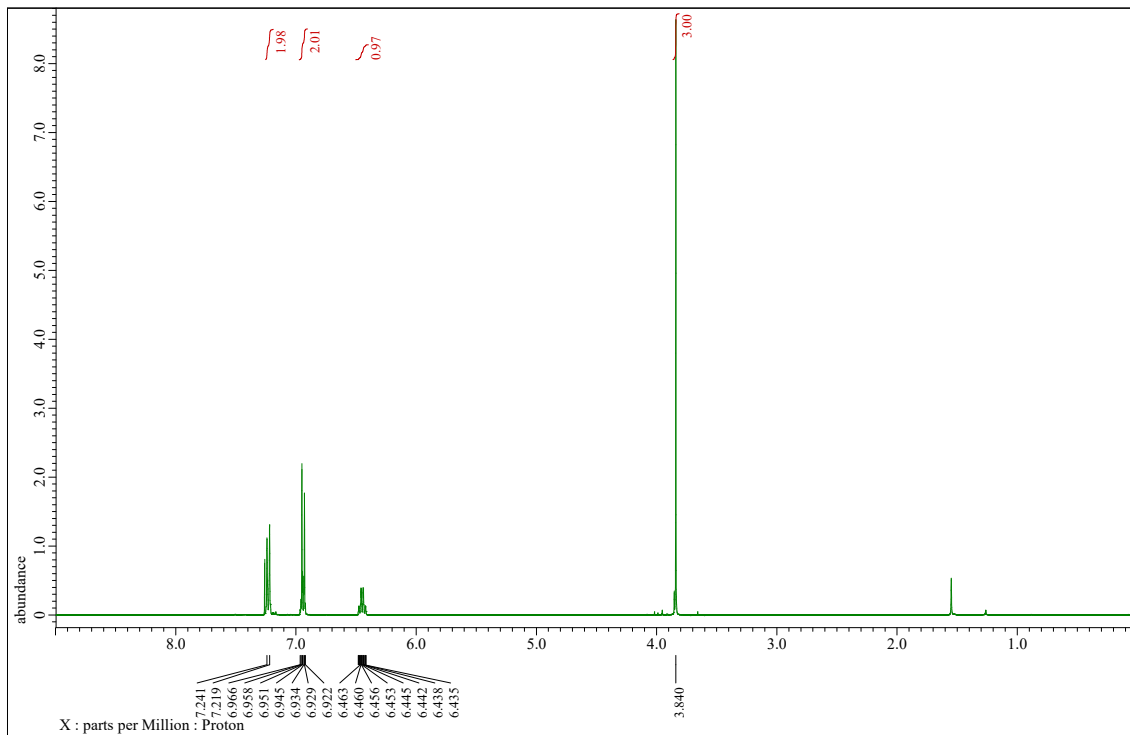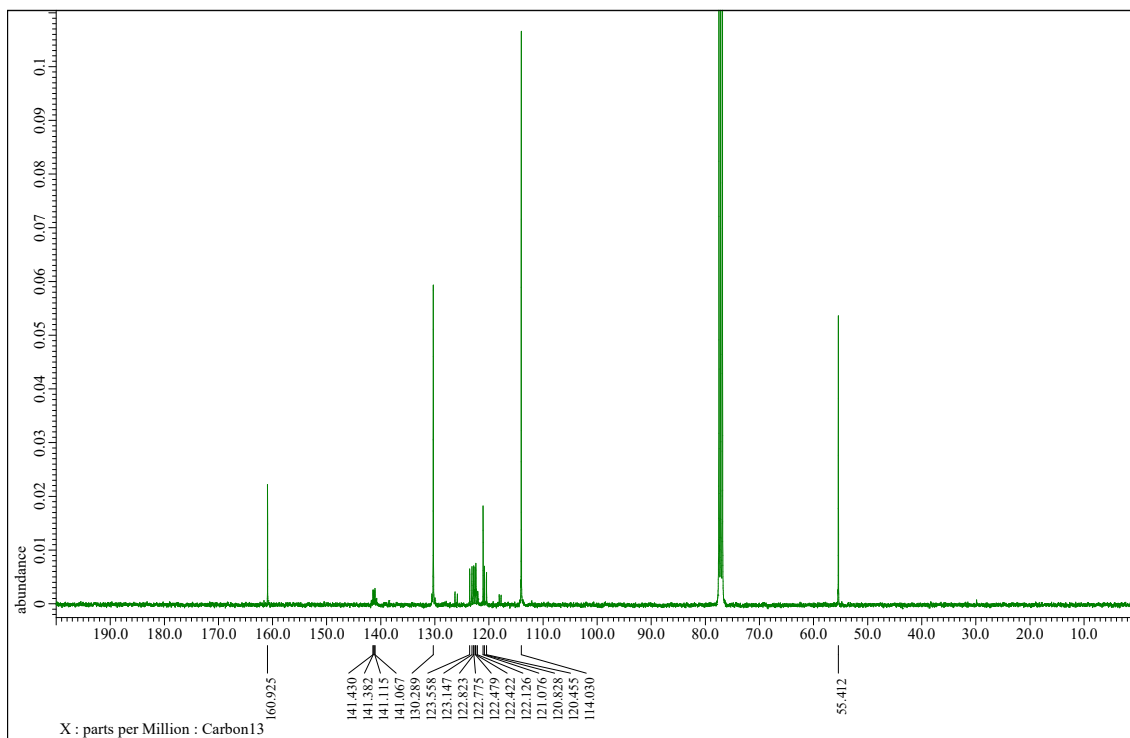

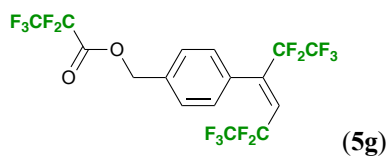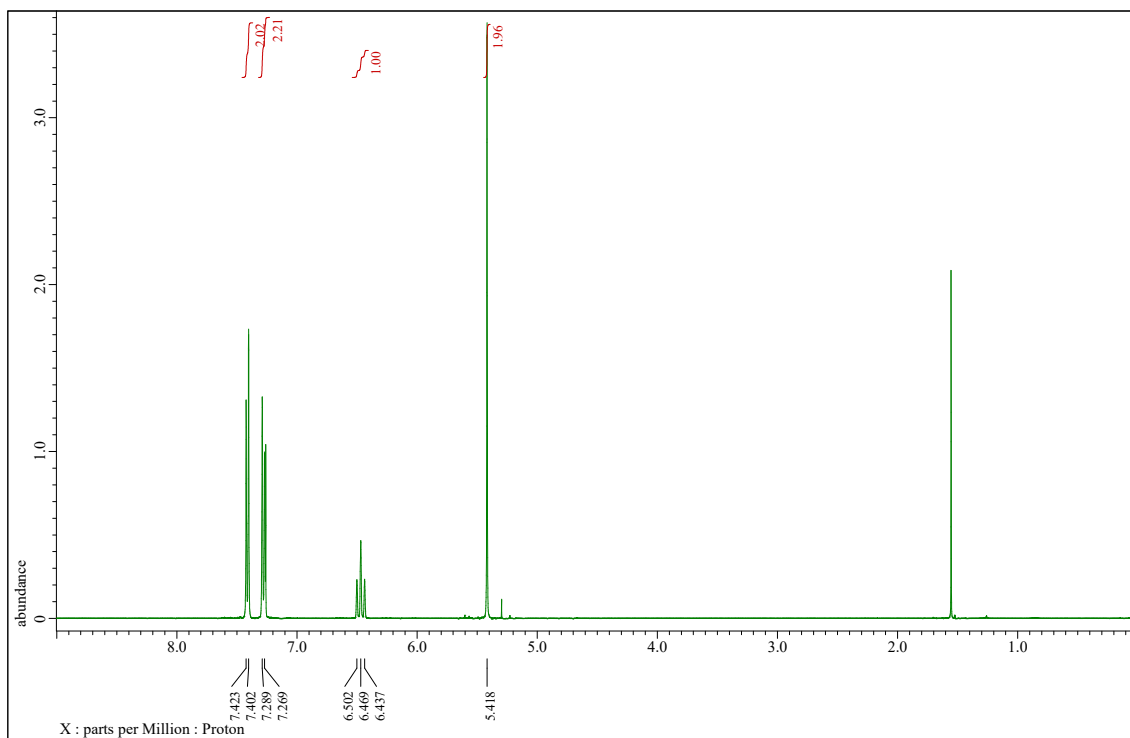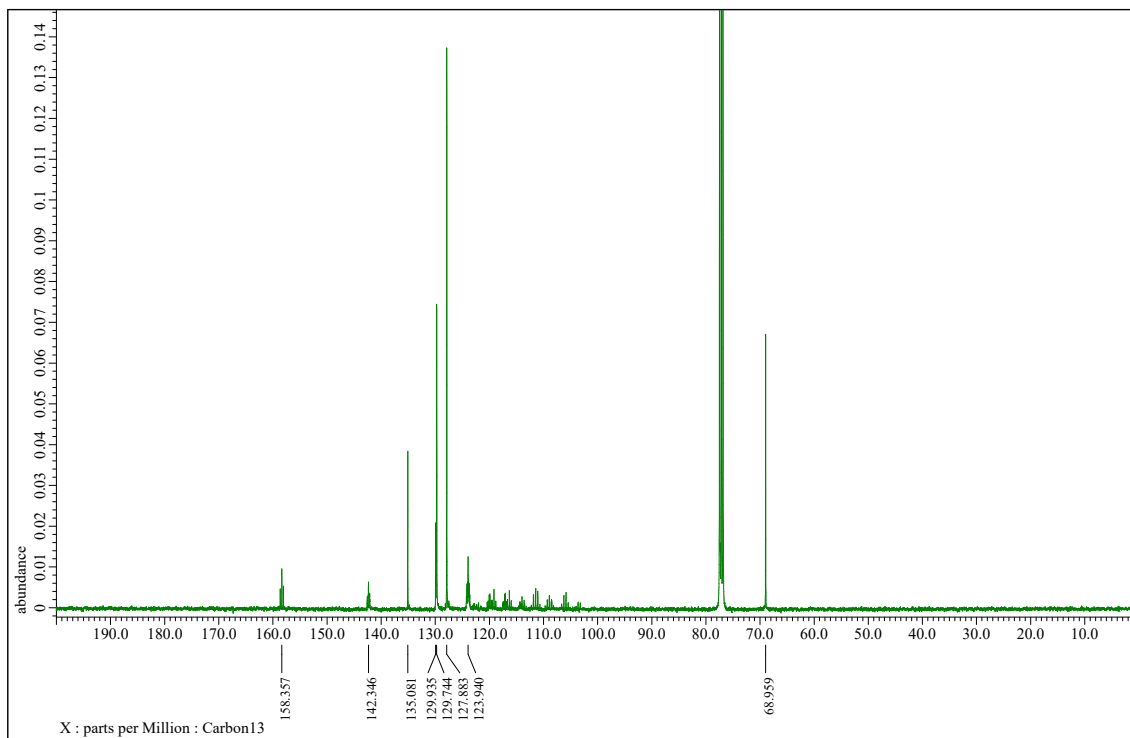

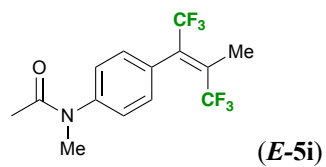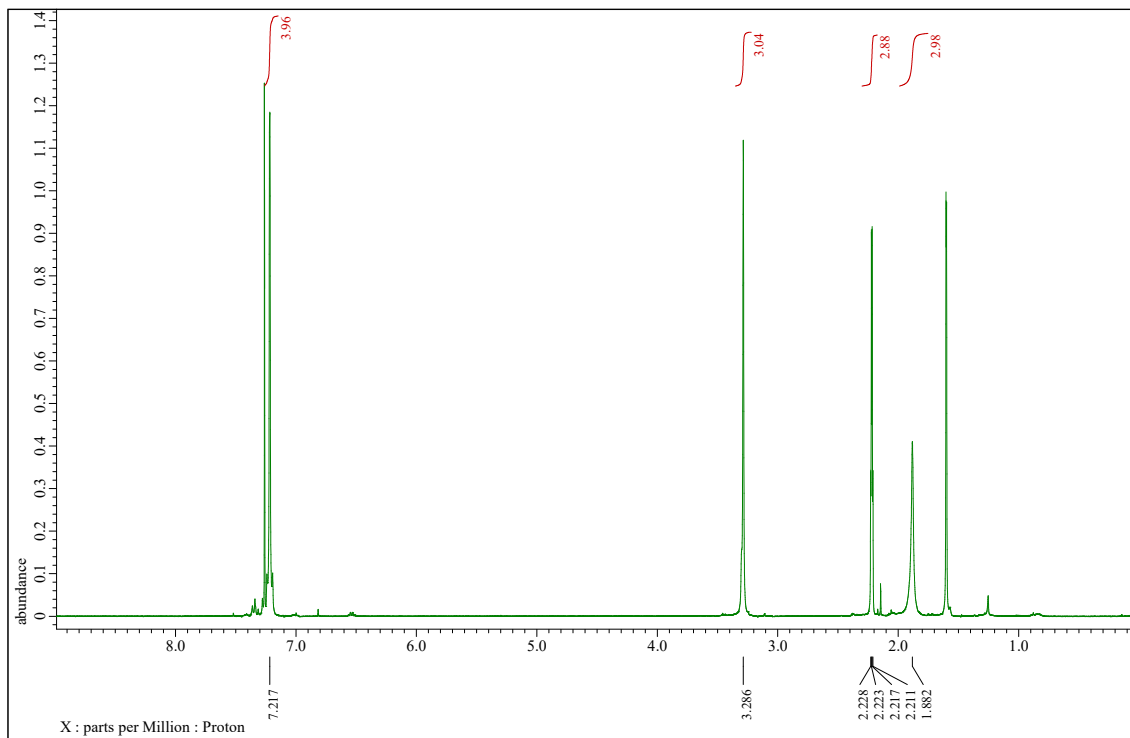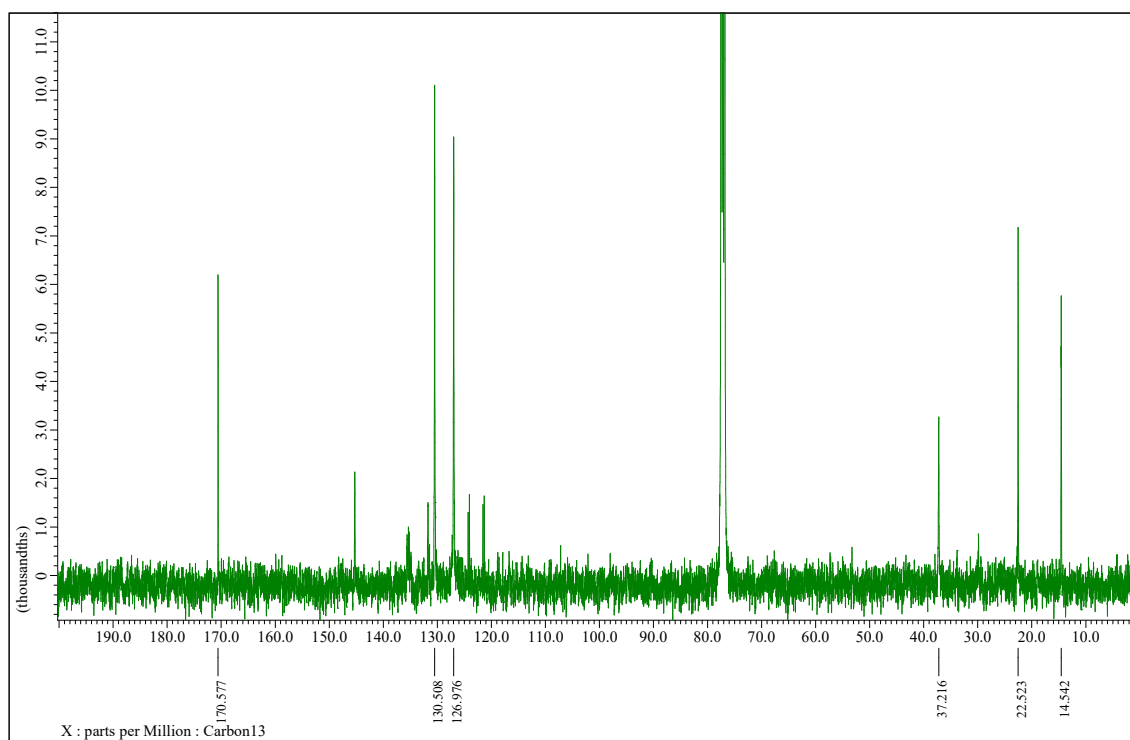

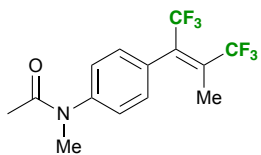

(Z-5i)

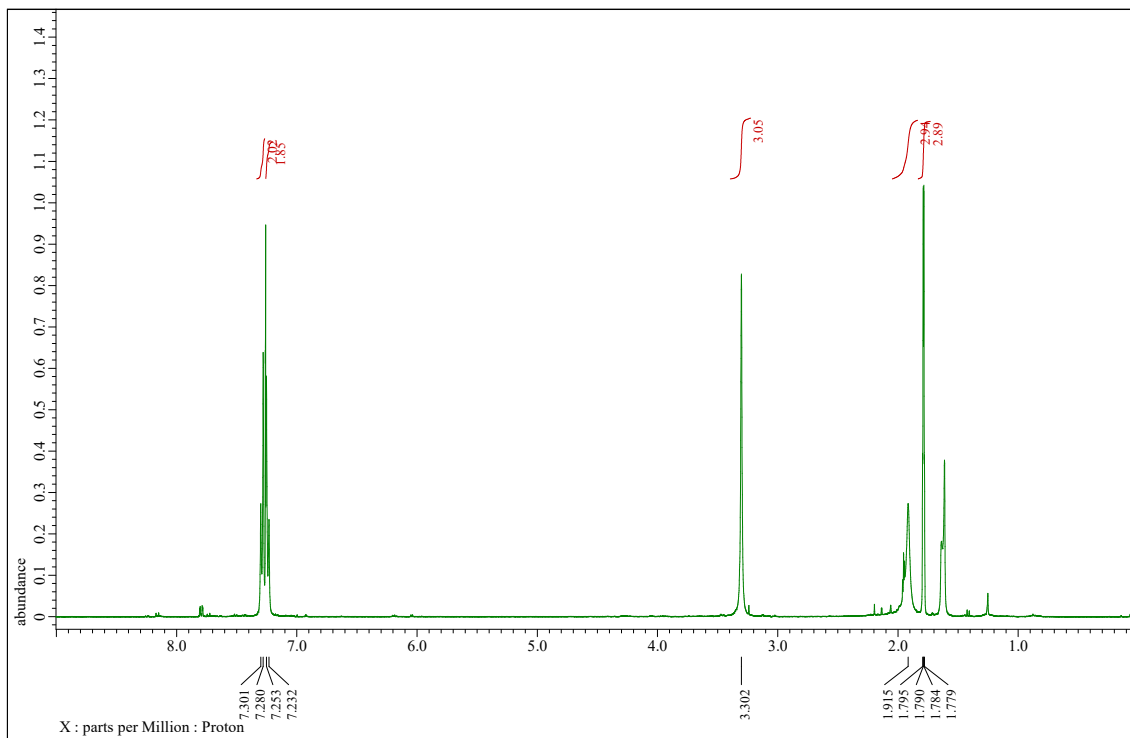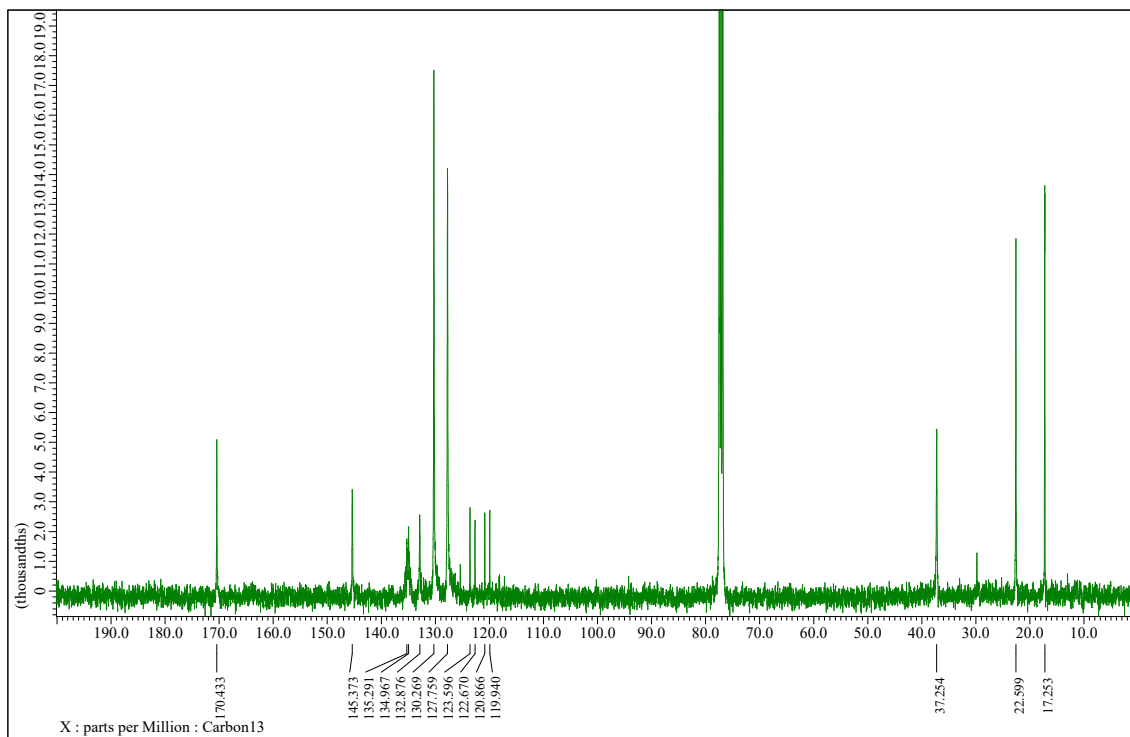



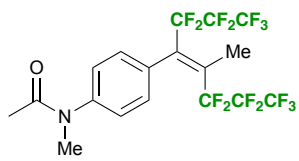

(E-5j)

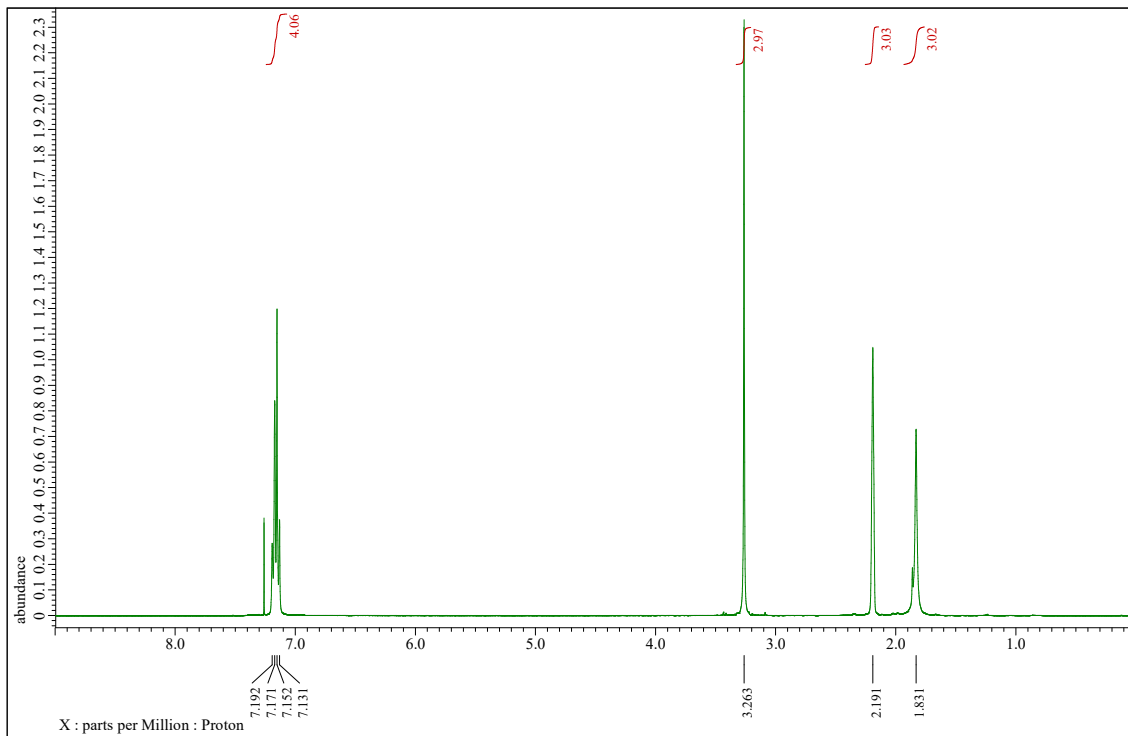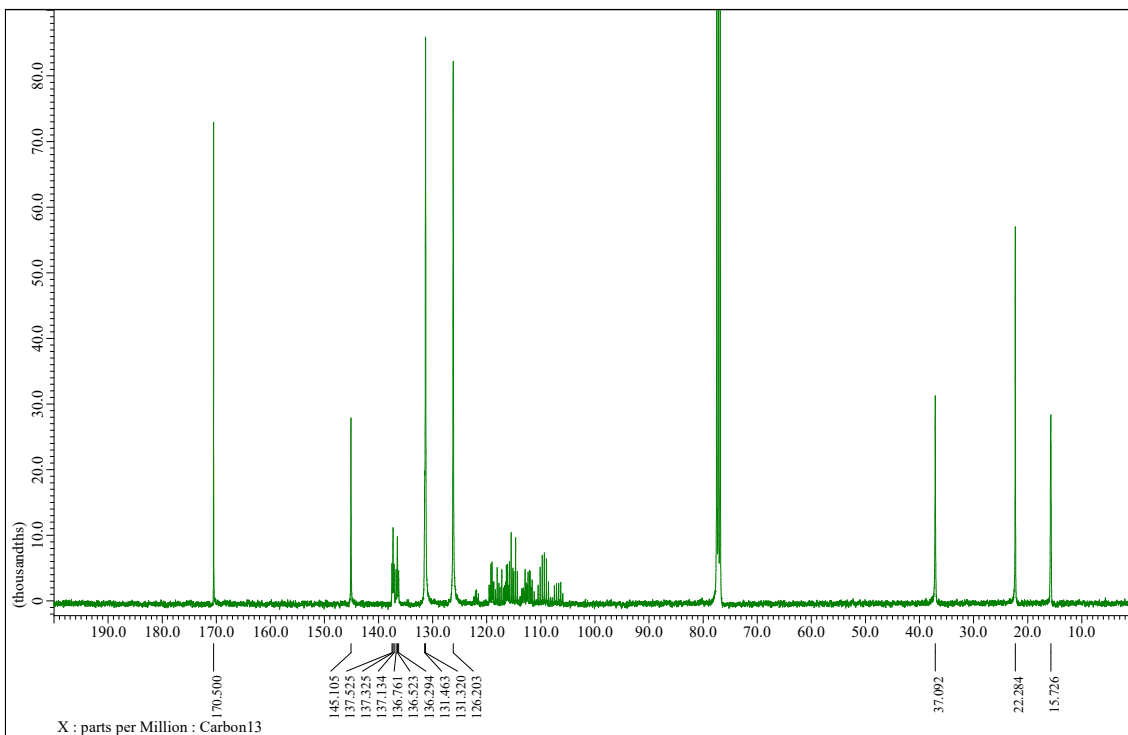

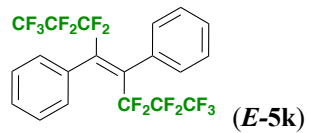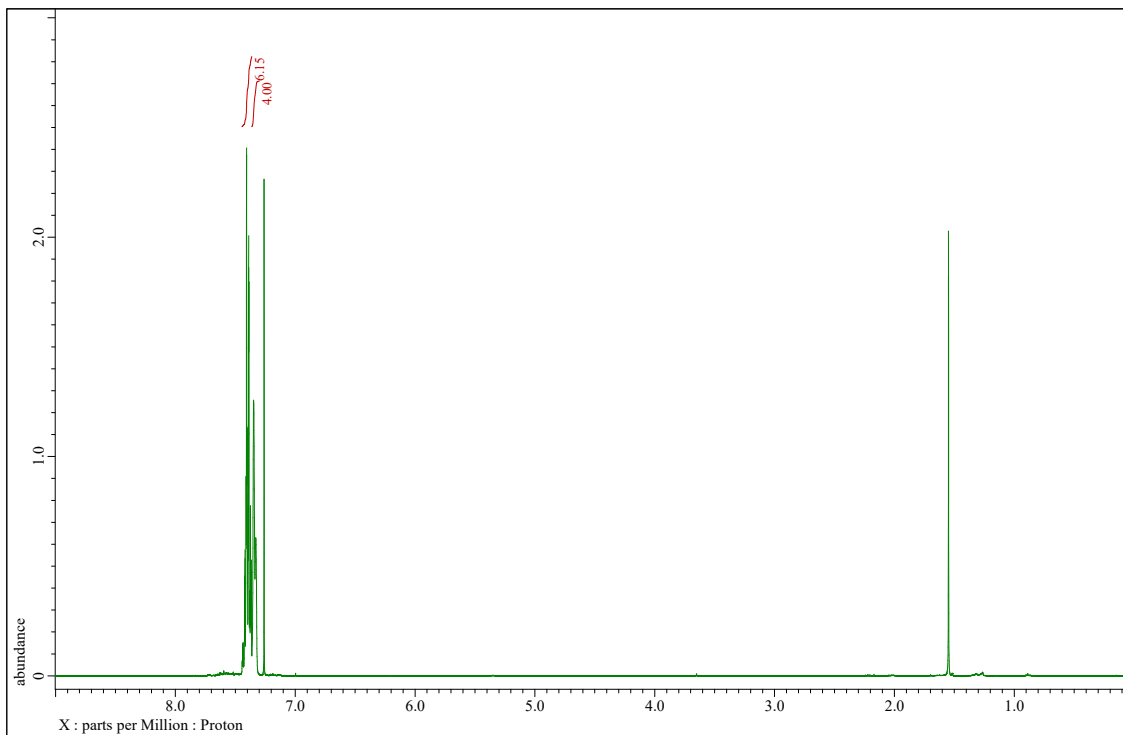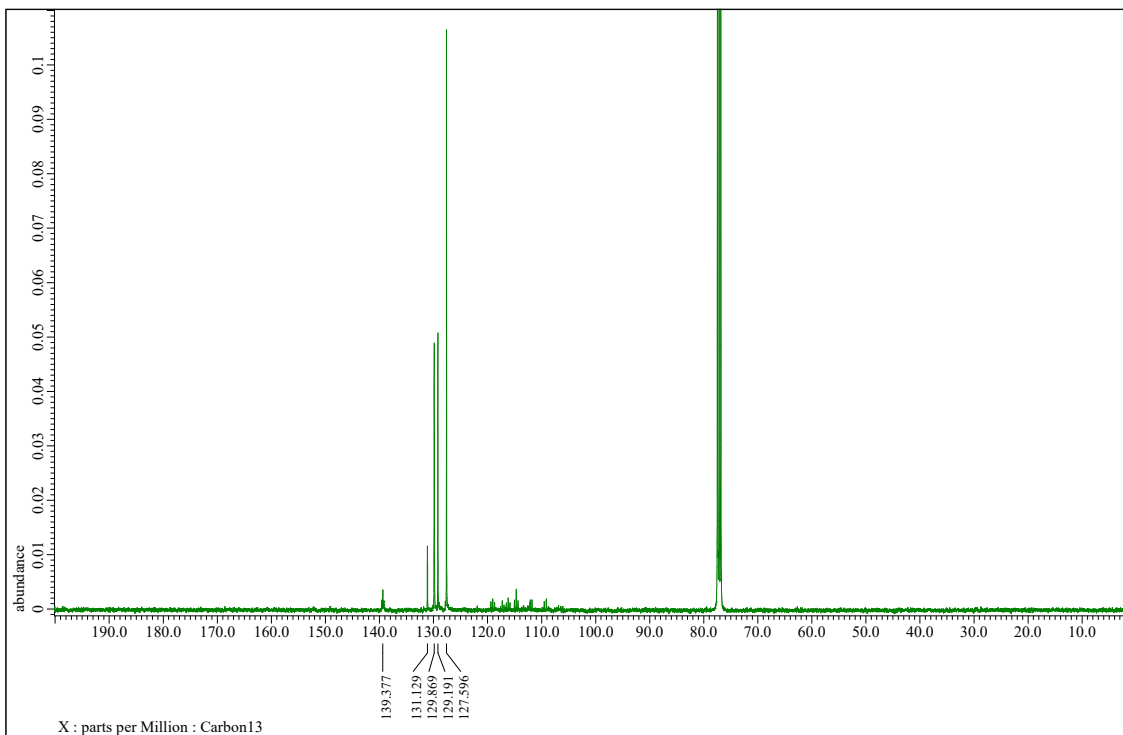

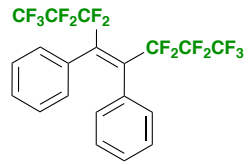

(Z-5k)

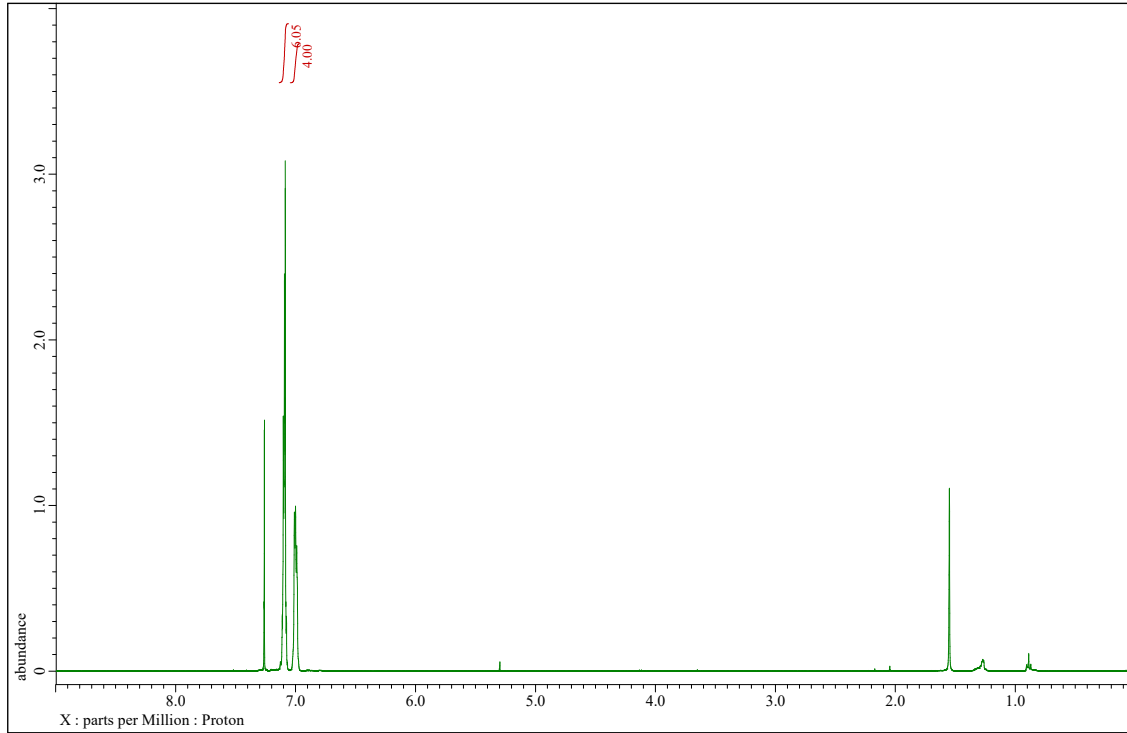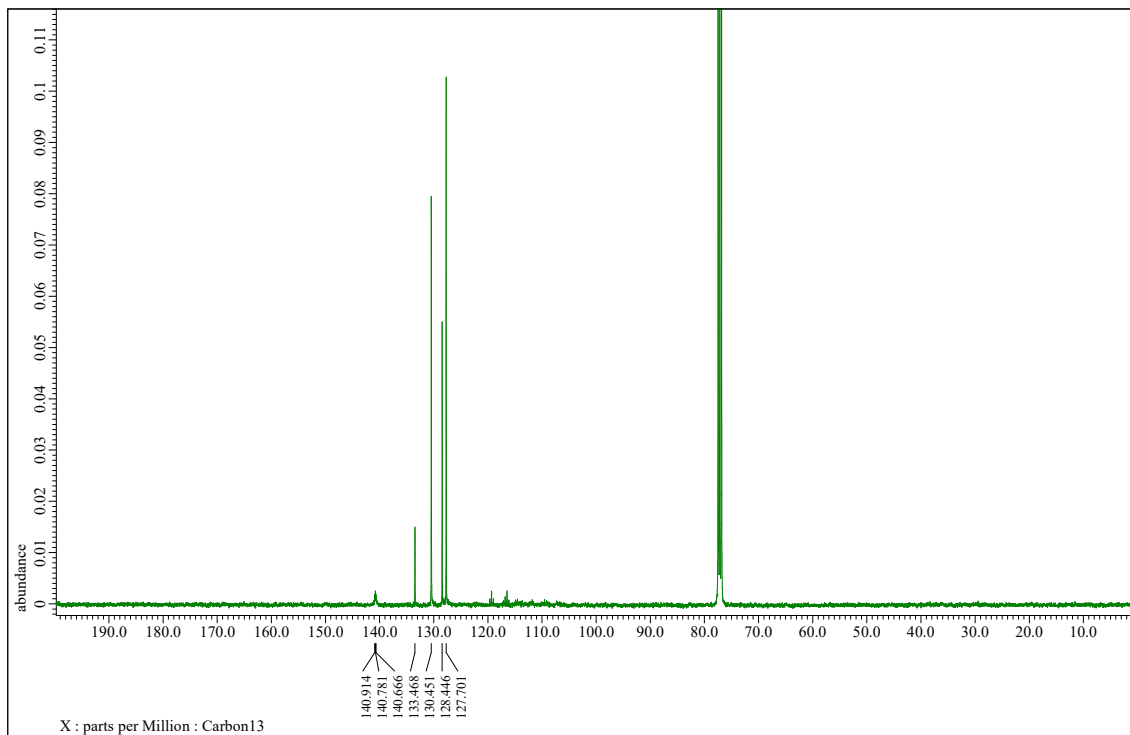

## Computational details:

DFT calculations were conducted using Gaussian 16 software. All structures except Cu (optimised by SDD) were optimised using UM06/6-311G+(d,p). The CPCM solvation model (dichloromethane) was used to determine the solvent effect. The free energies described in this work were obtained using vibrational analysis at the UM06 level of theory. No imaginary frequencies were observed for the intermediates, but one imaginary frequency was noted for the transition state. The reaction pathway from the transition state was confirmed by IRC calculations and the vibration mode of the imaginary frequency.

## Cartesian coordinates and energies

### • CF<sub>3</sub>

E(UM06) = -337.542753086  
Charge = 0, Multiplicity = 2  
C 0. 0.0000002727 0.3257056461  
F 0.0000000444 1.248725998 -0.0719813204  
F 1.0814281782 -0.6243626284 -0.0719813204  
F -1.0814282226 -0.6243625514 -0.0719813204

H 3.5357962731 2.1448673878 0.5999761158  
H 3.5357961898 -2.1448675251 0.5999761158  
H 4.6357027244 -0.00000009 1.1700246048

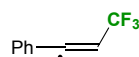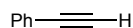

E(UM06) = -308.226576804  
Charge = 0, Multiplicity = 1  
C 2.0134156043 -0.0000142392 0.0000224296  
C 3.2169221889 0.000030717 0.0000042684  
C 0.5873826611 -0.0000095105 0.0000111601  
H 4.2821022694 0.000040596 -0.0000206594  
C -0.1196539442 1.2071833155 0.0000053432  
C -0.1196618307 -1.2071978444 0.0000073107  
C -1.5054042703 1.2031871605 -0.0000037407  
H 0.4292280914 2.1438315325 0.0000083879  
C -1.5054120688 -1.2031927066 -0.000001781  
H 0.4292142431 -2.1438495545 0.0000118725  
C -2.2010195002 -0.0000004763 -0.0000074217  
H -2.0459252456 2.1444030741 -0.000008012  
H -2.0459392765 -2.144405046 -0.0000045198  
H -3.286460922 0.0000029819 -0.0000146379

E(UM06) = -645.840068489  
Charge = 0, Multiplicity = 2  
C 0.2311991222 0.0000027677 -0.6173048082  
C 1.4833792429 -0.0000051005 -0.9504055841  
C -1.1022008805 0.0000021567 -0.3171248451  
H 1.8326368835 -0.0000061438 -1.9862664729  
C 2.5883746138 -0.0000026833 0.0555375277  
C -1.8127329476 -1.2233888855 -0.1557945855  
C -1.8127340267 1.2233928098 -0.155796763  
F 3.3808265632 1.0743394367 -0.0899937504  
F 2.1496852737 0.0000047897 1.3140775253  
F 3.3808215234 -1.074349988 -0.0899829011  
C -3.15602741 -1.2081967149 0.1470663538  
H -1.2787497344 -2.1605149323 -0.2759003599  
C -3.15602846 1.2081998826 0.147064243  
H -1.2787516415 2.1605191216 -0.2759041967  
C -3.8390700453 0.0000014207 0.3012101754  
H -3.68658609 -2.1476695058 0.2667156199  
H -3.6865879634 2.1476724102 0.2667118501  
H -4.8974050233 0.0000011585 0.5402109716

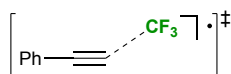

E(UM06) = -645.770641158  
Charge = 0, Multiplicity = 2  
C -0.0620286276 0.0000000012 -1.260332804  
C -1.1925555104 0.0000000232 -1.7060180715  
C 1.1975132339 -0.0000000233 -0.6124802549  
H -2.043625539 0.0000000397 -2.3511325314  
C -2.6008142495 0.0000000505 0.2308469713  
C 1.8262935401 1.210004589 -0.2872709063  
C 1.8262934931 -1.2100046599 -0.2872709063  
F -3.358859682 -1.0807914593 0.2370139763  
F -1.8056724799 0.0000000351 1.280230503  
F -3.35885964 1.0807915897 0.2370139763  
C 3.0552923021 1.2043789834 0.3501398455  
H 1.3386671266 2.1462080143 -0.540367371  
C 3.0552922553 -1.2043791021 0.3501398455  
H 1.3386670432 -2.1462080663 -0.540367371  
C 3.6722701433 -0.0000000713 0.6702096359

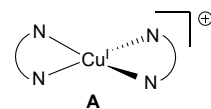

E(UM06) = -1187.59614284  
Charge = 1, Multiplicity = 1  
Cu -0.2625505071 -0.3981000749 -0.05272981  
N 1.6007507293 -1.245657992 -0.237350358  
C 1.8652228733 -2.4999933352 -0.6036618524  
H 1.0145320059 -3.1751503634 -0.6530348906  
C 3.1436758448 -2.9390362556 -0.9033730214  
H 3.3115703383 -3.9698051573 -1.1922227718  
C 4.1865232063 -2.028812585 -0.8242980605  
H 5.2020451506 -2.3301087184 -1.0576048714  
C 3.917176864 -0.7224613734 -0.4511097066  
H 4.7186387542 0.0053033339 -0.4038874346

|   |               |                |               |
|---|---------------|----------------|---------------|
| C | 2.6072505668  | -0.3583315433  | -0.1601166158 |
| N | 0.9010614657  | 1.2698596554   | 0.2360199585  |
| C | 2.2207132069  | 1.0150515454   | 0.2349727978  |
| C | 3.1457546772  | 1.9870797636   | 0.5988039987  |
| H | 4.2063147123  | 1.7656172656   | 0.6124199577  |
| C | 2.6940333026  | 3.2439504937   | 0.9655705249  |
| H | 3.4012162336  | 4.0137307024   | 1.2550209053  |
| C | 1.3314219355  | 3.5000849405   | 0.9659841684  |
| H | 0.9369179799  | 4.4693028171   | 1.247238414   |
| C | 0.4717549156  | 2.4794858045   | 0.5966727522  |
| H | -0.6047994991 | 2.6304796741   | 0.5831096207  |
| N | -1.6526826818 | -1.0851914679  | -1.4011297377 |
| C | -1.414515527  | -1.4590283941  | -2.6584654167 |
| H | -0.4259991899 | -1.2293675937  | -3.0484368341 |
| C | -2.3598556831 | -2.0997035163  | -3.4412443394 |
| H | -2.1227274787 | -2.3812002903  | -4.4603869799 |
| C | -3.6015222761 | -2.3664877786  | -2.8851854819 |
| H | -4.368237593  | -2.8725660288  | -3.4618087041 |
| C | -3.8527137794 | -1.98665574488 | -1.5770615929 |
| H | -4.8118227779 | -2.2054985487  | -1.1229672301 |
| C | -2.8537103767 | -1.3426262352  | -0.855590879  |
| N | -1.8980470269 | -0.5359369906  | 1.1825543877  |
| C | -3.0233311251 | -0.910765938   | 0.5503546448  |
| C | -4.258235547  | -0.8736111663  | 1.1881448312  |
| H | -5.1622135487 | -1.1609663915  | 0.6643671845  |
| C | -4.3252490282 | -0.4432878537  | 2.5029709923  |
| H | -5.2805914344 | -0.4048275349  | 3.0151401601  |
| C | -3.1610870368 | -0.0562244224  | 3.1488694939  |
| H | -3.1703134142 | 0.2875707449   | 4.1764049111  |
| C | -1.9696511523 | -0.1165555278  | 2.4460445185  |
| H | -1.0305430796 | 0.1779097852   | 2.9080003663  |

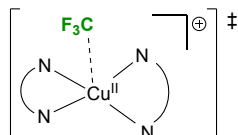

E(UM06) = -1525.1477252  
Charge = 1, Multiplicity = 2

|    |               |               |               |
|----|---------------|---------------|---------------|
| Cu | -0.4683674    | -0.2577415495 | 0.0525699404  |
| N  | -2.3119325697 | -1.2479369431 | 0.1603856081  |
| C  | -2.5166883496 | -2.5642651019 | 0.1804988747  |
| H  | -1.6474225583 | -3.1828089206 | 0.3909674496  |
| C  | -3.7588589025 | -3.1331094455 | -0.0462680037 |
| H  | -3.8796098775 | -4.2094917052 | -0.0140979576 |
| C  | -4.8273185361 | -2.2914413958 | -0.3159641873 |
| H  | -5.8143194863 | -2.6969077775 | -0.5107942218 |
| C  | -4.6201561168 | -0.9221913777 | -0.3426490856 |
| H  | -5.44001238   | -0.2518504122 | -0.5722923598 |
| C  | -3.3442300899 | -0.4282100942 | -0.0942225276 |
| N  | -1.716253352  | 1.3285572043  | -0.1426608313 |
| C  | -3.0248650025 | 1.0163657775  | -0.0984420727 |
| C  | -4.0031290428 | 2.0016019271  | -0.0320620083 |
| H  | -5.0519053264 | 1.7347015276  | 0.0232153595  |
| C  | -3.6222549728 | 3.3328105019  | -0.0105157612 |
| H  | -4.372791013  | 4.1138572037  | 0.0446766921  |
| C  | -2.2732275255 | 3.6486904553  | -0.0464321378 |
| H  | -1.9306115807 | 4.6763831397  | -0.0254290723 |
| C  | -1.3563282907 | 2.6136549589  | -0.1088138672 |
| H  | -0.2895332021 | 2.8147805816  | -0.1364685955 |
| C  | 2.2034791483  | 1.1808171701  | -1.6730825201 |
| F  | 2.0536341146  | 0.6745703664  | -2.8726022433 |
| F  | 1.6255923987  | 2.3548700108  | -1.5780857732 |
| F  | 3.472944323   | 1.2538291275  | -1.3479633056 |

|   |               |               |               |
|---|---------------|---------------|---------------|
| N | 1.1566971056  | -0.0583945948 | 1.3142382537  |
| C | 2.2426630317  | -0.7354060649 | 0.9040909193  |
| N | 0.8626501839  | -1.4900078645 | -0.8998854115 |
| C | 3.4744237642  | -0.572409749  | 1.5274923157  |
| H | 4.3499058248  | -1.1060486383 | 1.1770743072  |
| C | 2.0434023667  | -1.6183567563 | -0.2689012409 |
| C | 0.6090825218  | -2.2413306232 | -1.970963565  |
| H | -0.3611501195 | -2.0980352932 | -2.439807503  |
| C | 1.2638474708  | 0.7883005779  | 2.3378237682  |
| H | 0.3550070915  | 1.3114386983  | 2.6253682185  |
| C | 3.0070750297  | -2.5144164841 | -0.7170699832 |
| H | 3.9498745244  | -2.6238653778 | -0.1945729742 |
| C | 2.4550979964  | 1.001901124   | 3.0109449047  |
| H | 2.4955032794  | 1.6998496544  | 3.8388088145  |
| C | 3.5787622983  | 0.3050890903  | 2.5941511214  |
| H | 4.5330720696  | 0.4487755107  | 3.0891837637  |
| C | 1.522861839   | -3.1474214121 | -2.4823035991 |
| H | 1.2782598708  | -3.7290534141 | -3.3631050216 |
| C | 2.7436859274  | -3.2822778157 | -1.8399925228 |
| H | 3.485773514   | -3.9838837969 | -2.2052879134 |

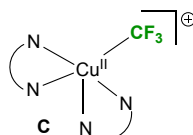

E(UM06) = -1525.18612334  
Charge = 1, Multiplicity = 2

|    |               |               |               |
|----|---------------|---------------|---------------|
| Cu | 0.3995106577  | -1.327888663  | -1.5708588817 |
| C  | 1.2511396542  | -2.3263032793 | 1.0247156547  |
| N  | 1.7857429486  | -2.0347105888 | -0.172928435  |
| N  | -0.0474724505 | -3.370682898  | -2.3645600074 |
| N  | -0.7978727104 | -1.5273355486 | 0.0825838151  |
| C  | -0.2023392434 | -2.095550614  | 1.1467800646  |
| C  | 0.7571573474  | -3.7053187561 | -3.3815366674 |
| N  | 1.7119159636  | -1.5087006843 | -3.127264345  |
| C  | 2.0313797019  | -2.8188887364 | 2.06282425    |
| H  | 1.5948868866  | -3.0437899233 | 3.0279225257  |
| C  | 0.6489929634  | -4.9394755833 | -4.01411829   |
| H  | 1.2956937155  | -5.2072110224 | -4.8406084191 |
| C  | 1.7514355278  | -2.6808735284 | -3.7837210213 |
| C  | -2.1146122495 | -1.3167913222 | 0.0991993967  |
| H  | -2.54742809   | -0.868796231  | -0.788524454  |
| C  | -0.9357420889 | -2.4582717981 | 2.2688464637  |
| H  | -0.4525782754 | -2.9200614332 | 3.1208200036  |
| C  | 3.3864088409  | -3.0149920695 | 1.8533366809  |
| H  | 4.0108674689  | -3.3957273206 | 2.6540486379  |
| C  | 3.0876645274  | -2.231794571  | -0.3717647651 |
| H  | 3.4743222248  | -1.9886441643 | -1.3574903431 |
| C  | -2.3025634714 | -2.2354021492 | 2.2852908364  |
| H  | -2.8887587705 | -2.5174776898 | 3.1529563535  |
| C  | 2.5682815377  | -0.5355596818 | -3.4399194621 |
| H  | 2.4764740361  | 0.3873001762  | -2.8742287607 |
| C  | 3.9286689097  | -2.7196764601 | 0.6138346923  |
| H  | 4.9824612374  | -2.8601018461 | 0.4063476263  |
| C  | -0.9656336836 | -4.2337628341 | -1.9451719971 |
| H  | -1.591029316  | -3.9130842769 | -1.1132604749 |
| C  | 2.6935503653  | -2.8947995134 | -4.7843165336 |
| H  | 2.7344359524  | -3.8390631855 | -5.3124791759 |
| C  | -1.1390552526 | -5.4829941808 | -2.5205961308 |
| H  | -1.9026616364 | -6.155863791  | -2.1490132545 |
| C  | -2.9071077756 | -1.657106741  | 1.1818982585  |
| H  | -3.9733937757 | -1.4697438501 | 1.1503711805  |
| C  | -0.3130844244 | -5.8351999679 | -3.5753737926 |

|   |               |               |               |
|---|---------------|---------------|---------------|
| H | -0.4146310747 | -6.8014295628 | -4.0576116607 |
| C | 3.5305995206  | -0.6830199646 | -4.4216928674 |
| H | 4.2116174774  | 0.1298556155  | -4.6418168115 |
| C | 3.5905543976  | -1.8893353147 | -5.1017976718 |
| H | 4.331165518   | -2.0484402344 | -5.8779039695 |
| C | -0.7358965257 | 0.030687931   | -2.5141720325 |
| F | -1.1982989257 | 1.0381432615  | -1.7204320682 |
| F | -1.8669770473 | -0.5455540378 | -3.0268906627 |
| F | -0.1679925933 | 0.6634900337  | -3.5713424847 |

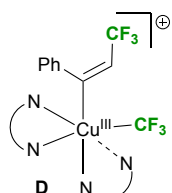

E(UM06) = -2171.06360737

Charge = 1, Multiplicity = 1

|    |               |               |               |
|----|---------------|---------------|---------------|
| Cu | 0.387263252   | -0.2340181899 | -0.2485978944 |
| N  | -0.3056713722 | -1.0868444712 | 1.4246692808  |
| C  | 0.1935088337  | -0.7576710901 | 2.6186844261  |
| H  | 0.9860803379  | -0.0151309552 | 2.6049313631  |
| C  | -0.2636971213 | -1.3264417912 | 3.7931336371  |
| H  | 0.1635109374  | -1.024019032  | 4.7413839172  |
| C  | -1.2613548669 | -2.2845299686 | 3.7158412129  |
| H  | -1.6379297209 | -2.7649949836 | 4.6122760008  |
| C  | -1.7704189451 | -2.6321906048 | 2.4767805027  |
| H  | -2.5326153926 | -3.3974581861 | 2.3984248085  |
| C  | -1.2865689733 | -2.0063882295 | 1.3337300678  |
| N  | -1.0756507119 | -1.889086121  | -1.0481044194 |
| C  | -1.8148991243 | -2.3145804699 | -0.0150944702 |
| C  | -3.0153583713 | -2.990914594  | -0.2057985563 |
| H  | -3.6281277504 | -3.2928792521 | 0.6354866393  |
| C  | -3.434413188  | -3.2571546812 | -1.49939253   |
| H  | -4.3672867271 | -3.7834749578 | -1.6708434728 |
| C  | -2.6541944011 | -2.8381387353 | -2.5645892947 |
| H  | -2.9444892746 | -3.0307903738 | -3.5906627208 |
| C  | -1.4844506795 | -2.1475377413 | -2.2869018754 |
| H  | -0.8465095128 | -1.7870075283 | -3.0911640607 |
| C  | 0.7921935519  | 0.581114357   | -1.9809104196 |
| F  | 1.3054734841  | -0.4033083045 | -2.7433174886 |
| F  | -0.2148024253 | 1.0918195376  | -2.7021986184 |
| F  | 1.7337334565  | 1.5297652617  | -1.8894692939 |
| C  | -0.8474159639 | 1.2888226102  | -0.0475670826 |
| C  | -0.3083522319 | 2.481669915   | 0.1369677484  |
| C  | -2.2515432146 | 0.9062826251  | 0.0444885837  |
| H  | 0.7560560735  | 2.6683866255  | 0.0442796797  |
| C  | -1.0733714362 | 3.7106022566  | 0.5100037547  |
| C  | -2.8453866786 | 0.771765492   | 1.3049959145  |
| C  | -3.0216525904 | 0.6853138733  | -1.1010813154 |
| F  | -1.1323812267 | 3.8643330671  | 1.8465978863  |
| F  | -0.4584728855 | 4.8008452069  | 0.029907863   |
| F  | -2.3285776866 | 3.7397070938  | 0.0624715804  |
| C  | -4.1839059504 | 0.431083191   | 1.4141064345  |
| H  | -2.2499488314 | 0.9468245565  | 2.1979469343  |
| C  | -4.3578945981 | 0.3407476251  | -0.9846703917 |
| H  | -2.5671909557 | 0.7935292835  | -2.0803278876 |
| C  | -4.9417561287 | 0.2096213374  | 0.2704823829  |
| H  | -4.6370526211 | 0.3386751446  | 2.3961487569  |
| H  | -4.9491044388 | 0.1741203761  | -1.8797889897 |
| H  | -5.9890423015 | -0.0621516739 | 0.3568289475  |
| C  | 3.3070171258  | -1.0047809232 | -0.0488588948 |
| C  | 1.9081660659  | -2.7316974193 | -0.6729329458 |

|   |              |               |               |
|---|--------------|---------------|---------------|
| C | 2.9619922303 | -3.6167978231 | -0.8014156684 |
| C | 4.2427234763 | -3.1589088212 | -0.5430142787 |
| C | 4.4135199656 | -1.8405906556 | -0.1618342093 |
| H | 0.8917023486 | -3.0451462275 | -0.8823268802 |
| H | 2.7713857799 | -4.6407263244 | -1.0991301085 |
| H | 5.098143559  | -3.8203923001 | -0.6264890405 |
| H | 5.3996894802 | -1.4605856971 | 0.0777851556  |
| C | 3.4725202279 | 0.3928271467  | 0.4059875189  |
| C | 4.6227479907 | 1.1181483818  | 0.1063852426  |
| C | 4.7407716089 | 2.4088372703  | 0.5939307219  |
| H | 5.4008100184 | 0.6920596451  | -0.5169595188 |
| C | 2.6085764366 | 2.1353305393  | 1.6110353381  |
| C | 3.7218783377 | 2.9281065538  | 1.3777341662  |
| H | 5.62010299   | 3.0014713206  | 0.3650860847  |
| H | 1.784143975  | 2.5091758051  | 2.2183725782  |
| H | 3.7807891444 | 3.9263563472  | 1.7956173965  |
| N | 2.0652304026 | -1.4559675915 | -0.3052081374 |
| N | 2.4695392075 | 0.9049312722  | 1.1230669389  |

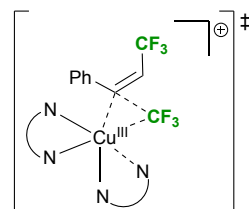

E(UM06) = -2171.05224547

Charge = 1, Multiplicity = 1

|    |               |               |               |
|----|---------------|---------------|---------------|
| Cu | 0.3032290322  | -0.4239344143 | -0.1802861062 |
| N  | -0.4733585817 | -0.6943845013 | 1.6991890678  |
| C  | 0.0846804317  | -0.1086006995 | 2.7599279313  |
| H  | 1.0120186753  | 0.4225534664  | 2.5654266543  |
| C  | -0.4677341438 | -0.17712023   | 4.0264309707  |
| H  | 0.0164827148  | 0.3205765664  | 4.8578964903  |
| C  | -1.6389779816 | -0.8982559401 | 4.1915638679  |
| H  | -2.1034091457 | -0.9845469379 | 5.1679794997  |
| C  | -2.2123861634 | -1.5170458364 | 3.0942057318  |
| H  | -3.1187241249 | -2.0962762921 | 3.2175249393  |
| C  | -1.6130563263 | -1.3918292335 | 1.8450033007  |
| N  | -1.4558536535 | -1.9289682313 | -0.4903060711 |
| C  | -2.1955520314 | -2.0013512304 | 0.6241383802  |
| C  | -3.4490434425 | -2.607687954  | 0.626541172   |
| H  | -4.054861866  | -2.6383882641 | 1.5237302095  |
| C  | -3.9289484127 | -3.1699201175 | -0.5440773413 |
| H  | -4.9035223585 | -3.6460162733 | -0.5590409296 |
| C  | -3.1501383694 | -3.1143745445 | -1.6881492128 |
| H  | -3.4827474555 | -3.5465591784 | -2.6245267117 |
| C  | -1.9230135717 | -2.4768165762 | -1.6105131357 |
| H  | -1.2848936098 | -2.4006976531 | -2.4871292813 |
| C  | -0.5252722136 | 1.3135991335  | -0.5363470006 |
| C  | 0.2416183575  | 2.3516724263  | -0.2164390524 |
| C  | -1.9873856414 | 1.1942792092  | -0.5044050547 |
| H  | 1.3223361481  | 2.2937447652  | -0.2808877629 |
| C  | -0.2348550093 | 3.6870775826  | 0.2507875824  |
| C  | -2.6397720608 | 1.4675495679  | 0.7044876648  |
| C  | -2.746401831  | 0.7833120361  | -1.6028553798 |
| F  | -1.3794363268 | 4.0828274129  | -0.3043817217 |
| F  | -0.4126497316 | 3.7125776291  | 1.5849842514  |
| F  | 0.6859745048  | 4.6191027744  | -0.0258840817 |
| C  | -4.0170069087 | 1.3569371901  | 0.8022146398  |
| H  | -2.0604181078 | 1.7597784244  | 1.5759344778  |
| C  | -4.1233789206 | 0.6722882905  | -1.4977974934 |
| H  | -2.2652199096 | 0.5492519296  | -2.5455670455 |
| C  | -4.7636664011 | 0.9583469003  | -0.2985329826 |

|   |               |               |               |
|---|---------------|---------------|---------------|
| H | -4.50584836   | 1.5751639422  | 1.7464429317  |
| H | -4.6999970538 | 0.3550679259  | -2.3609952255 |
| H | -5.8421462468 | 0.8647561498  | -0.2210867798 |
| C | 3.1635611266  | -1.5125167644 | -0.0851394766 |
| C | 1.5184035319  | -3.0796109595 | -0.4651837857 |
| C | 2.4378256266  | -4.1064643387 | -0.5750537406 |
| C | 3.7815967668  | -3.8048466095 | -0.435963004  |
| C | 4.1446873015  | -2.4934813972 | -0.1868553687 |
| H | 0.4570893902  | -3.2754944467 | -0.5713564876 |
| H | 2.0966948905  | -5.1169813604 | -0.7649672133 |
| H | 4.5373957667  | -4.5794224918 | -0.5086224246 |
| H | 5.1854068749  | -2.2278634855 | -0.0408990698 |
| C | 3.5541180963  | -0.1181775695 | 0.2261652851  |
| C | 4.724419105   | 0.4259191303  | -0.2994824057 |
| C | 5.0709612118  | 1.7211072619  | 0.0452360849  |
| H | 5.3384974031  | -0.1457668484 | -0.9867004407 |
| C | 3.1037305514  | 1.8049368793  | 1.3778030933  |
| C | 4.2522543721  | 2.4270717152  | 0.9140875427  |
| H | 5.9692171034  | 2.1741856299  | -0.3607231342 |
| H | 2.4305995003  | 2.3346983642  | 2.0531262927  |
| H | 4.4905827738  | 3.4383508984  | 1.2228420887  |
| N | 1.8581772325  | -1.8070005901 | -0.2282174201 |
| N | 2.7453033483  | 0.5687598857  | 1.0349676509  |
| C | 0.5376706885  | 0.4016881331  | -2.0872325304 |
| F | 1.8084918903  | 0.7995144129  | -2.0682402348 |
| F | -0.1006621658 | 1.2088491582  | -2.9419330794 |
| F | 0.4898947103  | -0.808168822  | -2.6752496152 |

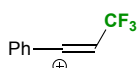

E(UM06) = -645.638958676

Charge = 1, Multiplicity = 1

|   |               |               |               |
|---|---------------|---------------|---------------|
| C | 0.1785070164  | 0.000235831   | -0.6452917415 |
| C | 1.4240823325  | 0.0003845771  | -0.9483333985 |
| C | -1.1267561656 | 0.000496088   | -0.331137333  |
| H | 1.7376388044  | 0.0005970914  | -1.9925199478 |
| C | 2.5150529761  | 0.0002376911  | 0.0911367908  |
| C | -1.8162782743 | -1.2436856179 | -0.1688036371 |
| C | -1.8165073341 | 1.2435897278  | -0.1682849654 |
| F | 3.2803850682  | 1.0751091775  | -0.0529805293 |
| F | 2.021874538   | -0.0000505823 | 1.323284607   |
| F | 3.2805288989  | -1.0744701011 | -0.0534276844 |
| C | -3.1474656731 | -1.2277925459 | 0.1441996774  |
| H | -1.2675124757 | -2.1695165496 | -0.2991455851 |
| C | -3.1476904733 | 1.2273199497  | 0.1447166274  |
| H | -1.2679119628 | 2.1695761893  | -0.2982394958 |
| C | -3.8041241924 | -0.0003288434 | 0.2981367499  |
| H | -3.6945292111 | -2.1536607626 | 0.272307269   |
| H | -3.6949230471 | 2.1530338081  | 0.2732172504  |
| H | -4.8613488251 | -0.000477649  | 0.5450893458  |

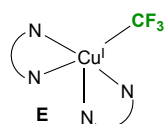

E(UM06) = -1525.34129933

Charge = 0, Multiplicity = 1

|    |              |               |               |
|----|--------------|---------------|---------------|
| Cu | 0.3585084256 | -1.7334931769 | -1.7818190849 |
| C  | 0.946055632  | -2.3836115213 | 1.2008715592  |
| N  | 1.4907605262 | -2.3783710887 | -0.0246187079 |
| N  | 0.2200226309 | -3.5705274571 | -2.7406303166 |

|   |               |               |               |
|---|---------------|---------------|---------------|
| N | -1.2655650536 | -2.5420490856 | 0.2879848752  |
| C | -0.5055313965 | -2.1003198626 | 1.2945161903  |
| C | 1.0332311393  | -3.8255082782 | -3.779221749  |
| N | 2.1240601135  | -1.7618011016 | -3.2820105925 |
| C | 1.7023249381  | -2.6545210719 | 2.3386613682  |
| H | 1.2294072513  | -2.6728005311 | 3.3147095015  |
| C | 1.0435493317  | -5.0673338083 | -4.4085993967 |
| H | 1.7268198697  | -5.2632514254 | -5.2271395654 |
| C | 1.9260438483  | -2.7207388903 | -4.1951644195 |
| C | -2.5682572918 | -2.2807710328 | 0.324843765   |
| H | -3.1579410342 | -2.6556762651 | -0.5115270589 |
| C | -1.0301483425 | -1.3889214896 | 2.370645459   |
| H | -0.3810689633 | -1.0251624818 | 3.1603467729  |
| C | 3.0521857659  | -2.9310265859 | 2.203091622   |
| H | 3.6564700955  | -3.1541908557 | 3.0763288569  |
| C | 2.79072755    | -2.6482630298 | -0.1449405598 |
| H | 3.1829162199  | -2.6299395528 | -1.1600987535 |
| C | -2.3887842595 | -1.1195485726 | 2.393555759   |
| H | -2.8219628426 | -0.5544500392 | 3.2125657908  |
| C | 2.9164420833  | -0.7379222368 | -3.5868620986 |
| H | 3.0461602577  | 0.0143118151  | -2.8105748585 |
| C | 3.6120492496  | -2.9304984262 | 0.9346916937  |
| H | 4.663089893   | -3.1455304105 | 0.7788781871  |
| C | -0.593796919  | -4.5352937986 | -2.3065687301 |
| H | -1.2121343488 | -4.2712324535 | -1.4511418217 |
| C | 2.5125104105  | -2.666323529  | -5.4574404932 |
| H | 2.3146328635  | -3.4345101431 | -6.1965877462 |
| C | -0.647933848  | -5.7911474961 | -2.8869421187 |
| H | -1.3295144775 | -6.539789998  | -2.4997061044 |
| C | -3.1801609153 | -1.5727899879 | 1.3493754209  |
| H | -4.2475418453 | -1.3835286198 | 1.3244935649  |
| C | 0.189625945   | -6.0597919896 | -3.9594455189 |
| H | 0.1866869894  | -7.0349927078 | -4.4349577675 |
| C | 3.5516123579  | -0.6117796525 | -4.8125618938 |
| H | 4.191852249   | 0.2396804759  | -5.0133166924 |
| C | 3.3363186404  | -1.5965401408 | -5.765751642  |
| H | 3.8000721874  | -1.529198655  | -6.7443730904 |
| C | -0.4847215614 | 0.031979247   | -1.6988542429 |
| F | -0.5040040249 | 0.6088408352  | -0.4346550277 |
| F | -1.8181223968 | 0.1265635688  | -2.0762822256 |
| F | 0.1028521254  | 1.0318255075  | -2.463386109  |

[Cu(CH<sub>3</sub>CN)<sub>4</sub>]<sup>+</sup>

E(UM06) = -728.119844908

Charge = 1, Multiplicity = 1

|    |               |               |               |
|----|---------------|---------------|---------------|
| Cu | 0.0070924327  | 0.0071104129  | 0.0004895804  |
| N  | -0.3513199901 | 1.6532869359  | -1.1075728905 |
| N  | -1.6111974795 | -0.3924776437 | 1.1367466687  |
| N  | 0.3696449849  | -1.5701404961 | -1.2033202233 |
| N  | 1.6132748586  | 0.3305285453  | 1.1752687038  |
| C  | 0.5707981159  | -2.4792441236 | -1.8768785445 |
| C  | 2.5371712925  | 0.5124097025  | 1.8340020651  |
| C  | -2.5421963084 | -0.6228667938 | 1.7698136006  |
| C  | -0.5566285838 | 2.5992104901  | -1.7269871231 |
| C  | 0.821736889   | -3.6201645632 | -2.7195705563 |
| H  | -0.0459288816 | -3.8129569276 | -3.3535888029 |
| H  | 1.6901016886  | -3.4320216859 | -3.3539290019 |
| H  | 1.0152799759  | -4.5015852688 | -2.1050031749 |
| C  | 3.6963627507  | 0.7395659237  | 2.6582313859  |
| H  | 3.5286003791  | 1.5997542826  | 3.3092417256  |
| H  | 3.8928302184  | -0.1395477124 | 3.2751245426  |
| H  | 4.5677226504  | 0.9343389517  | 2.0298603846  |
| C  | -0.8137414792 | 3.7859079264  | -2.5017849573 |
| H  | 0.0774472979  | 4.0607781469  | -3.0694085243 |
| H  | -1.6361880871 | 3.6067136623  | -3.1970191914 |

|   |               |               |               |
|---|---------------|---------------|---------------|
| H | -1.0817860852 | 4.6117987633  | -1.8399437095 |
| C | -3.7103284838 | -0.9116990833 | 2.5615348566  |
| H | -3.5335477116 | -1.7945351414 | 3.1789954734  |
| H | -3.9394120901 | -0.0644990735 | 3.2109183972  |
| H | -4.5650573542 | -1.10019323   | 1.9088893153  |

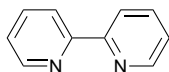

E(UM06) = -495.131539831

Charge = 0, Multiplicity = 1

|   |               |               |               |
|---|---------------|---------------|---------------|
| N | 1.3569007778  | -1.1351053668 | 0.365446587   |
| C | 2.6858923121  | -1.1499406138 | 0.3746593355  |
| H | 3.1554286258  | -2.0824350718 | 0.6841815834  |
| C | 3.4727572488  | -0.0620078331 | 0.0208838166  |
| H | 4.554332092   | -0.1353161721 | 0.0459413946  |
| C | 2.8339927848  | 1.1054052478  | -0.3652720096 |
| H | 3.4052185482  | 1.9792539601  | -0.662049971  |
| C | 1.4491406126  | 1.1374236535  | -0.3754703197 |
| H | 0.920885447   | 2.0302577434  | -0.6934030277 |
| C | 0.7431617488  | -0.0054535471 | -0.0002161457 |
| N | -1.3569007778 | -1.1351053668 | -0.365446587  |
| C | -0.7431617488 | -0.0054535471 | 0.0002161457  |
| C | -1.4491406126 | 1.1374236535  | 0.3754703197  |
| H | -0.920885447  | 2.0302577434  | 0.6934030277  |
| C | -2.8339927848 | 1.1054052478  | 0.3652720096  |
| H | -3.4052185482 | 1.9792539601  | 0.662049971   |
| C | -3.4727572488 | -0.0620078331 | -0.0208838166 |
| H | -4.554332092  | -0.1353161721 | -0.0459413946 |
| C | -2.6858923121 | -1.1499406138 | -0.3746593355 |
| H | -3.1554286258 | -2.0824350718 | -0.6841815834 |

CH<sub>3</sub>CN

E(UM06) = -132.701263999

Charge = 0, Multiplicity = 1

|   |               |               |               |
|---|---------------|---------------|---------------|
| C | -0.0000356171 | 0.0000140303  | 0.2735580482  |
| N | 0.0000298536  | -0.0000563631 | 1.4258254902  |
| C | 0.0000019173  | 0.0000375147  | -1.1709132004 |
| H | -0.0000067133 | 1.0250432957  | -1.5467072212 |
| H | 0.8877350721  | -0.512521884  | -1.5465693812 |
| H | -0.8877245127 | -0.5125155937 | -1.5465957356 |

CF<sub>3</sub>CO<sub>2</sub><sup>-</sup>

E(UM06) = -526.311698489

Charge = -1, Multiplicity = 1

|   |               |               |              |
|---|---------------|---------------|--------------|
| O | 0.0440918997  | -0.8800585852 | 0.3468334588 |
| C | 0.0651959577  | -0.0632447926 | 1.2776931835 |
| O | 0.992269338   | 0.5670056663  | 1.7970703316 |
| C | -1.3535544425 | 0.1904015969  | 1.8855266691 |
| F | -1.880230436  | -0.9444804427 | 2.3818671432 |
| F | -2.2153747777 | 0.6341525531  | 0.9525388145 |
| F | -1.3770045392 | 1.0850700043  | 2.8790413992 |

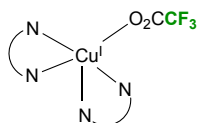

E(UM06) = -1713.92363168

Charge = 0, Multiplicity = 1

|    |               |               |               |
|----|---------------|---------------|---------------|
| Cu | 0.3905512822  | -2.4017181884 | -1.4653360984 |
| C  | 0.9751230936  | -2.0495117784 | 1.3796175455  |
| N  | 1.6003641048  | -2.1631104541 | 0.1958666632  |
| N  | 0.2845374177  | -4.0168567819 | -2.6722517713 |
| N  | -1.0546707238 | -2.246174812  | 0.1314204484  |
| C  | -0.5071261298 | -2.0099217383 | 1.3309882397  |
| C  | 0.8948828684  | -4.0381947592 | -3.8678368465 |
| N  | 2.457889558   | -2.3356976318 | -3.2063504251 |
| C  | 1.6912738672  | -1.9854260049 | 2.5712818285  |
| H  | 1.1789945377  | -1.9101781591 | 3.5231251499  |
| C  | 0.7186115694  | -5.0934089906 | -4.7574297417 |
| H  | 1.2432230014  | -5.0944388306 | -5.7067335384 |
| C  | 1.754732069   | -2.8786649515 | -4.2058795567 |
| C  | -2.3784839936 | -2.2153773729 | -0.0027778616 |
| H  | -2.7532681472 | -2.3888454277 | -1.0102175443 |
| C  | -1.2943879906 | -1.7342127104 | 2.4455774108  |
| H  | -0.8459461341 | -1.5257187554 | 3.4098763044  |
| C  | 3.0746633362  | -2.0320939501 | 2.533140613   |
| H  | 3.6472319207  | -1.9832084327 | 3.4533218418  |
| C  | 2.9317136377  | -2.2191618393 | 0.1661075068  |
| H  | 3.3732914243  | -2.3348739599 | -0.8213734646 |
| C  | -2.6725361182 | -1.713940584  | 2.305117972   |
| H  | -3.3031083949 | -1.5001618882 | 3.1618090388  |
| C  | 3.195535212   | -1.2640979049 | -3.4755968557 |
| H  | 3.7576565587  | -0.8406093278 | -2.6438018061 |
| C  | 3.7125146097  | -2.151429294  | 1.3078254425  |
| H  | 4.7928236434  | -2.1973205657 | 1.233211937   |
| C  | -0.5185254201 | -5.0328072737 | -2.3434404522 |
| H  | -1.0004707972 | -4.9627692638 | -1.3710383511 |
| C  | 1.7784926522  | -2.3717392007 | -5.5016088803 |
| H  | 1.1771274585  | -2.8268312035 | -6.2816342893 |
| C  | -0.7460335082 | -6.1156459297 | -3.1744758195 |
| H  | -1.4070141998 | -6.9138282326 | -2.8574729761 |
| C  | -3.2313751105 | -1.9595829261 | 1.0601922262  |
| H  | -4.3047886617 | -1.9474521386 | 0.9095574051  |
| C  | -0.1100208965 | -6.145557173  | -4.4060975404 |
| H  | -0.25337665   | -6.9804226201 | -5.0839420841 |
| C  | 3.27492474    | -0.6800777572 | -4.7330273456 |
| H  | 3.8884485615  | 0.1999438536  | -4.8903844698 |
| C  | 2.5515103249  | -1.2519442342 | -5.7662981592 |
| H  | 2.5752520235  | -0.8251726373 | -6.7637452939 |
| O  | -0.1306491317 | -0.6924856035 | -2.6128189668 |
| C  | -1.2225934298 | -0.7268997454 | -3.2213161176 |
| O  | -2.1129032059 | -1.5734352839 | -3.2355683555 |
| C  | -1.430583997  | 0.5311929596  | -4.1143186775 |
| F  | -2.6448795965 | 0.60016571    | -4.6619872819 |
| F  | -0.5452308854 | 0.5438440623  | -5.1257485041 |
| F  | -1.2492303503 | 1.6671357316  | -3.4254044983 |

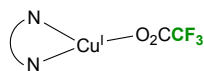

E(UM06) = -1218.76866197

Charge = 0, Multiplicity = 1

|    |               |               |               |
|----|---------------|---------------|---------------|
| Cu | -0.0681515222 | -0.5703197628 | 0.0114103314  |
| N  | 1.7900332103  | -1.3016231534 | 0.0170557955  |
| C  | 2.0913116824  | -2.602012929  | 0.0123523488  |
| H  | 1.2520114655  | -3.2902831351 | 0.0289937524  |
| C  | 3.3943156328  | -3.0680550662 | -0.0117441702 |
| H  | 3.5898711762  | -4.1335666761 | -0.0142205529 |
| C  | 4.4226038864  | -2.1400949404 | -0.0337003742 |
| H  | 5.4582003693  | -2.4619327562 | -0.0555624536 |
| C  | 4.115207689   | -0.7897535938 | -0.028657397  |
| H  | 4.9107727345  | -0.0550633463 | -0.0493818559 |



|   |               |               |               |
|---|---------------|---------------|---------------|
| C | 2.7831329112  | -0.3944294156 | -0.0011571776 |
| N | 1.0440026848  | 1.2456935602  | -0.020839181  |
| C | 2.3658846428  | 1.0299766787  | 0.0063823641  |
| C | 3.2705197043  | 2.0845872632  | 0.0416012812  |
| H | 4.3388423171  | 1.907919905   | 0.0702083695  |
| C | 2.7847546084  | 3.3831233344  | 0.0442563692  |
| H | 3.4742476248  | 4.2202287014  | 0.0719179837  |
| C | 1.4165208588  | 3.5967110142  | 0.0124549916  |
| H | 0.9999039989  | 4.5971769001  | 0.0126692146  |
| C | 0.5780446756  | 2.4917597277  | -0.0183276543 |
| H | -0.5054531749 | 2.5860397224  | -0.0434751154 |
| O | -1.9637068906 | -0.8465116856 | 0.0337171176  |
| C | -2.7300378107 | 0.1559951494  | -0.0372923548 |
| O | -2.4725076595 | 1.3446335595  | -0.1273303282 |
| C | -4.2197498873 | -0.2739422045 | 0.0083241843  |
| F | -4.5076719923 | -1.12596042   | -0.9837252924 |
| F | -5.0558249289 | 0.7548997835  | -0.098349404  |
| F | -4.5013690065 | -0.8982632147 | 1.1599652076  |

[Cu(CH<sub>3</sub>CN)<sub>3</sub>]<sup>+</sup>

E(UM06) = -932.970559034

Charge = 1, Multiplicity = 2

|    |               |               |               |
|----|---------------|---------------|---------------|
| Cu | -0.6185107628 | -0.1178388448 | -0.2242299991 |
| N  | -0.5895487117 | 1.6376264193  | -1.1686840563 |
| N  | -2.105308033  | -0.4537645496 | 1.0596391491  |
| N  | 0.1143903763  | -1.6920420224 | -1.2039489496 |
| C  | 0.614947947   | -2.5923009952 | -1.7102587277 |
| C  | -2.9007178324 | -0.641474139  | 1.8654963853  |
| C  | -0.5126076831 | 2.6651763453  | -1.6741436329 |
| C  | 1.2398347129  | -3.7197068805 | -2.345032645  |
| H  | 0.6130529528  | -4.0767698349 | -3.1644385904 |
| H  | 2.2144340361  | -3.4270215362 | -2.7404817954 |
| H  | 1.373919415   | -4.5241092837 | -1.6192737504 |
| C  | -0.4199838023 | 3.9492889472  | -2.3120236108 |
| H  | 0.5436363477  | 4.042030535   | -2.8166803204 |
| H  | -1.2211347507 | 4.0543238006  | -3.0463062614 |
| H  | -0.5119708626 | 4.7405996041  | -1.5656212678 |
| C  | -3.8994021675 | -0.877639233  | 2.8712616002  |
| H  | -3.5788227834 | -1.6907092455 | 3.5256358234  |
| H  | -4.045716219  | 0.0258055637  | 3.4663741548  |
| H  | -4.8436143223 | -1.1510179259 | 2.3962141764  |
| C  | 0.877246166   | 0.184236626   | 1.07412064    |
| F  | 1.0607077008  | -0.8857231108 | 1.8527087581  |
| F  | 0.6186527582  | 1.2285850373  | 1.8659009744  |
| F  | 2.0245910879  | 0.4279899731  | 0.4345511255  |

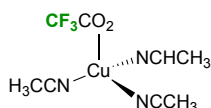

E(UM06) = -1121.742477030

Charge = 0, Multiplicity = 1

|    |               |               |               |
|----|---------------|---------------|---------------|
| Cu | -0.4322072821 | -0.0941508838 | -0.0469937392 |
| N  | -0.5554623788 | 1.6010247818  | -1.0930967674 |
| N  | -2.0066978364 | -0.425436495  | 1.1430823399  |
| N  | 0.1811013743  | -1.6768318869 | -1.0920046854 |
| C  | 0.6530063187  | -2.5632578576 | -1.6511525224 |
| C  | -2.8701847374 | -0.5883889179 | 1.8840168611  |
| C  | -0.5218084089 | 2.6022450833  | -1.656572516  |
| C  | 1.2480034874  | -3.673093221  | -2.3508983848 |
| H  | 0.8717527362  | -3.7145850575 | -3.3749481472 |
| H  | 2.333359872   | -3.5566206652 | -2.3766388599 |

|   |               |               |               |
|---|---------------|---------------|---------------|
| H | 1.0038839277  | -4.6090863703 | -1.8445599438 |
| C | -0.4776884015 | 3.8572904234  | -2.362530069  |
| H | 0.53501641    | 4.0446073447  | -2.7251397894 |
| H | -1.1605114871 | 3.8317038302  | -3.2140391013 |
| H | -0.7714922291 | 4.6709443341  | -1.696456407  |
| C | -3.9512925403 | -0.7895761203 | 2.8149762111  |
| H | -3.712466629  | -1.6116148407 | 3.4926020819  |
| H | -4.1116760827 | 0.1174236036  | 3.40121076    |
| H | -4.8695014447 | -1.0301135136 | 2.2755154114  |
| O | 1.0780271311  | 0.2362130035  | 1.412022509   |
| C | 2.2422238548  | 0.5024890655  | 1.0372252286  |
| O | 2.721764703   | 0.618538677   | -0.0854675328 |
| C | 3.2016846687  | 0.7094050158  | 2.245676349   |
| F | 3.2655261031  | -0.3948852767 | 3.0068336783  |
| F | 2.7754724296  | 1.7043008379  | 3.0398455853  |
| F | 4.4515964414  | 1.0068161058  | 1.8886834502  |

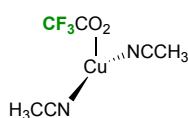

E(UM06) = -989.030908474

Charge = 0, Multiplicity = 1

|    |               |               |               |
|----|---------------|---------------|---------------|
| Cu | 1.2972584509  | -0.1240429484 | -0.1648940247 |
| O  | -0.7241175355 | 0.0489364396  | -0.803363273  |
| C  | -1.4022482137 | 0.1316251428  | 0.2465253728  |
| O  | -1.0336210999 | 0.1103759825  | 1.4179195943  |
| C  | -2.9211495751 | 0.2797246781  | -0.0350850695 |
| F  | -3.1690345678 | 1.3695730676  | -0.7756210514 |
| F  | -3.6556315232 | 0.3824907203  | 1.0710402454  |
| F  | -3.3863253572 | -0.7744344735 | -0.7212801504 |
| C  | 1.8678233918  | -3.1077286912 | 0.0300864556  |
| C  | 2.3108590942  | 2.739902174   | 0.0539273405  |
| C  | 2.0822453481  | -4.5272733342 | 0.1189950328  |
| H  | 1.3102870149  | -4.9799289302 | 0.7445195011  |
| H  | 2.0371556707  | -4.9709032073 | -0.8776836177 |
| H  | 3.0616252684  | -4.730593662  | 0.5564662115  |
| C  | 2.7340605396  | 4.111054274   | 0.1540818011  |
| H  | 3.0729599754  | 4.4652301995  | -0.8215862911 |
| H  | 1.9017402756  | 4.733374549   | 0.4888080294  |
| H  | 3.5546439611  | 4.196671596   | 0.8690899448  |
| N  | 1.6971844972  | -1.9742235045 | -0.0412405787 |
| N  | 1.9745123844  | 1.6447089278  | -0.0264544727 |

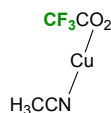

E(UM06) = -856.319746698

Charge = 0, Multiplicity = 1

|    |               |               |               |
|----|---------------|---------------|---------------|
| Cu | 0.8662935346  | 0.0547639739  | 0.7007321155  |
| O  | -0.9558370405 | -0.2978775402 | 0.7841010548  |
| C  | -1.6516881161 | -0.1787240381 | -0.2735701818 |
| O  | -1.315684868  | 0.1482185568  | -1.3937825375 |
| C  | -3.1370386781 | -0.5237139699 | -0.0004477922 |
| F  | -3.2621481597 | -1.7834912567 | 0.4329803631  |
| F  | -3.8933818006 | -0.3973228565 | -1.0848500457 |
| F  | -3.6489417046 | 0.2749351166  | 0.9427635282  |
| C  | 3.7968678648  | 0.5828069433  | 0.6902664405  |
| C  | 5.2103418134  | 0.8362747602  | 0.6751532578  |
| H  | 5.4567178429  | 1.6012148391  | 1.4141732082  |

|   |              |              |               |
|---|--------------|--------------|---------------|
| H | 5.7525474677 | -0.08088184  | 0.9136659492  |
| H | 5.5119378418 | 1.1840434381 | -0.3149693201 |
| N | 2.6676440024 | 0.3797938734 | 0.70122296    |

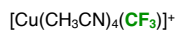

E(UM06) = -1065.69005012

Charge = 1, Multiplicity = 2

|    |               |               |               |
|----|---------------|---------------|---------------|
| Cu | 0.0028300682  | -0.0808633392 | 0.1933526124  |
| C  | 0.0093939624  | -2.0315136453 | -0.2497427965 |
| F  | 0.0112289022  | -2.266376234  | -1.5810243555 |
| F  | -1.0677319732 | -2.6850820663 | 0.2401009077  |
| F  | 1.0898334194  | -2.6782023773 | 0.2418500699  |
| N  | -1.8093246986 | 0.1467229367  | -0.816570255  |
| N  | -0.0037965633 | 1.9429903322  | 0.6504737566  |
| N  | 0.0014011335  | -0.5341387107 | 2.2320588768  |
| N  | 1.8151894038  | 0.1586696093  | -0.8131701809 |
| C  | -0.0061814662 | 3.0618626588  | 0.9044668248  |
| C  | -2.8018899702 | 0.1738351001  | -1.3926474357 |
| C  | -0.0036383766 | -0.8786820396 | 3.3270809054  |
| C  | 2.8087511134  | 0.1924457746  | -1.3871720335 |
| C  | -4.0457830384 | 0.2115212302  | -2.1148605876 |
| H  | -4.7803812157 | 0.7970199068  | -1.5587892867 |
| H  | -3.8912750785 | 0.6688938583  | -3.0939682294 |
| H  | -4.4255978869 | -0.802894405  | -2.2507415744 |
| C  | -0.0088466855 | 4.4650352239  | 1.2229797836  |
| H  | 0.9362821112  | 4.7395699646  | 1.6952629031  |
| H  | -0.136215517  | 5.051730846   | 0.3112906137  |
| H  | -0.8286531169 | 4.6879935589  | 1.908448579   |
| C  | -0.0091771989 | -1.3068873358 | 4.7007393255  |
| H  | 0.994711277   | -1.2176465192 | 5.1202215411  |
| H  | -0.6952535014 | -0.6862493076 | 5.280150899   |
| H  | -0.3303512125 | -2.3484265386 | 4.7621689659  |
| C  | 4.0537863775  | 0.2387622906  | -2.1068984911 |
| H  | 3.8939028725  | 0.6751322582  | -3.0946881762 |
| H  | 4.7763601522  | 0.847411515   | -1.5600342572 |
| H  | 4.4518697066  | -0.7710655457 | -2.2230399047 |

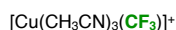

E(UM06) = -932.970304439

Charge = 1, Multiplicity = 2

|    |               |               |               |
|----|---------------|---------------|---------------|
| Cu | -0.0778857376 | 0.1230866127  | 0.3222159642  |
| N  | -0.6630402496 | 2.0336902856  | 0.2538418166  |
| N  | -1.6861168669 | -0.5571284694 | 1.3459419419  |
| N  | 0.1171082236  | -1.46987546   | -0.8697784873 |
| C  | 0.2867037811  | -2.359143754  | -1.5744403892 |
| C  | -2.582314424  | -0.9349599321 | 1.9547730701  |
| C  | -0.939440095  | 3.1459926908  | 0.203649132   |
| C  | 0.4911009036  | -3.4718996274 | -2.4598676983 |
| H  | -0.2318851926 | -3.4293611584 | -3.2768084169 |
| H  | 1.501290417   | -3.4350143731 | -2.8720850338 |
| H  | 0.3599743874  | -4.4076915004 | -1.9131442282 |
| C  | -1.292027865  | 4.5371520788  | 0.1390705205  |
| H  | -0.4054718903 | 5.1322535899  | -0.0881400916 |
| H  | -2.038492144  | 4.6917809819  | -0.6424685101 |
| H  | -1.7043674187 | 4.857802809   | 1.0977068977  |
| C  | -3.7050272714 | -1.4063307582 | 2.7178700092  |
| H  | -3.4912514244 | -2.4006574203 | 3.1145049551  |
| H  | -3.9008731218 | -0.7234523477 | 3.5467862478  |
| H  | -4.5889722437 | -1.4577690629 | 2.0791288954  |
| C  | 1.8444520888  | 0.6083695895  | 0.1436363684  |
| F  | 2.6642020211  | -0.436540151  | 0.3474409343  |
| F  | 2.2193622736  | 1.5669402191  | 1.0075390786  |
| F  | 2.1081192689  | 1.0735767575  | -1.0903529666 |

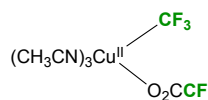

E(UM06) = -1459.31846019

Charge = 0, Multiplicity = 2

|    |               |               |               |
|----|---------------|---------------|---------------|
| Cu | 0.4965864916  | -1.4891009974 | -1.7280225349 |
| C  | -0.8714578543 | -0.6588347703 | -2.8976494865 |
| F  | -0.9966327354 | 0.6735807072  | -2.6815462771 |
| F  | -2.1177483661 | -1.1721344122 | -2.7237591338 |
| F  | -0.6153977917 | -0.7940530036 | -4.218078074  |
| O  | 1.9770660774  | -0.5318809616 | -2.807106477  |
| C  | 2.7985566716  | 0.3698157127  | -2.5103671571 |
| O  | 3.7853589319  | 0.747355898   | -3.1269646728 |
| C  | 2.5697221239  | 1.1067896907  | -1.1571648382 |
| F  | 1.3633436407  | 0.8919103277  | -0.6192984258 |
| F  | 3.4772177033  | 0.6943069913  | -0.2547387315 |
| F  | 2.7124968781  | 2.4259789807  | -1.2828301297 |
| C  | -0.0333984563 | -4.3847456348 | -3.1929614691 |
| C  | 2.8932865036  | -2.4567445096 | 0.1610085797  |
| C  | -1.502167164  | -0.9915338834 | 0.7820222772  |
| C  | -0.3011438243 | -5.589204571  | -3.9350812019 |
| H  | 0.5131435425  | -6.3022310307 | -3.7932895184 |
| H  | -1.2336453669 | -6.0391822563 | -3.5893591686 |
| H  | -0.3907358879 | -5.3569168469 | -4.9979596257 |
| C  | 4.0390124948  | -2.766923954  | 0.9740089256  |
| H  | 4.626787841   | -1.8610518422 | 1.1378380267  |
| H  | 3.7161622744  | -3.1634725313 | 1.938362332   |
| H  | 4.6613345801  | -3.5093197457 | 0.4709130047  |
| C  | -2.4280634539 | -0.6602863795 | 1.8332793567  |
| H  | -2.531013889  | -1.5037145404 | 2.5185594517  |
| H  | -2.0640407675 | 0.2071511167  | 2.3871672107  |
| H  | -3.4047832426 | -0.4257722491 | 1.4057327645  |
| N  | 0.182133485   | -3.42521677   | -2.5996788022 |
| N  | 1.9819957883  | -2.2039647081 | -0.4886508718 |
| N  | -0.7629172283 | -1.2557558268 | -0.0556213332 |

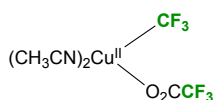

E(UM06) = -1326.60704759

Charge = 0, Multiplicity = 2

|    |               |               |               |
|----|---------------|---------------|---------------|
| Cu | 0.2556429261  | -0.4107601346 | -0.0018742164 |
| C  | -0.1835185556 | -2.3256247794 | 0.3430796081  |
| F  | 0.2297338256  | -3.1139130764 | -0.6814312148 |
| F  | 0.4506099571  | -2.8049579088 | 1.4432338068  |
| F  | -1.4860368835 | -2.6179419847 | 0.5223654752  |
| O  | -1.5439289032 | -0.0218714869 | -0.7405068159 |
| O  | -2.1825789597 | 0.4642867232  | 1.3560553788  |
| C  | -2.3621182736 | 0.3293006679  | 0.1586513915  |
| C  | -3.7703325926 | 0.5998588515  | -0.4284448458 |
| F  | -4.2630537723 | -0.5032806102 | -1.0024353963 |
| F  | -3.7238862394 | 1.5519028701  | -1.3681134826 |
| F  | -4.6404978231 | 0.9932085762  | 0.4951905544  |
| C  | 0.7648860108  | 2.7264352936  | 0.1594701743  |
| C  | 3.3240954333  | -1.1758568318 | 0.0448272613  |
| C  | 0.9118908677  | 4.1541397147  | 0.2484744412  |
| H  | -0.0719472932 | 4.6273182126  | 0.240397289   |
| H  | 1.4278831467  | 4.415871983   | 1.1741786796  |
| H  | 1.4924074679  | 4.5200479044  | -0.6005606361 |
| C  | 4.6980344705  | -1.5970422274 | 0.0760395634  |
| H  | 5.131135073   | -1.5147569032 | -0.9227068224 |
| H  | 5.2628344941  | -0.9659708056 | 0.7647377314  |

|   |              |               |              |
|---|--------------|---------------|--------------|
| H | 4.75812499   | -2.6351617395 | 0.4083649398 |
| N | 0.6461781961 | 1.5877472954  | 0.0877649872 |
| N | 2.2281794372 | -0.837937604  | 0.0177721485 |

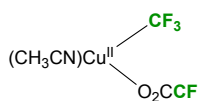

E(UM06) = -1193.88639055

Charge = 0, Multiplicity = 2

|    |               |               |               |
|----|---------------|---------------|---------------|
| Cu | 0.1962892064  | -0.8643302502 | -0.3625014321 |
| C  | -0.307554591  | -2.6173209809 | 0.495076227   |
| F  | 0.3524360509  | -3.6345429368 | -0.0815218485 |
| F  | 0.0421384379  | -2.6055078313 | 1.7896429451  |
| F  | -1.6094249969 | -2.9035826451 | 0.4328879982  |
| O  | -1.4589526442 | -0.1117780991 | -0.8471037514 |
| O  | -2.0321375402 | 0.1981866379  | 1.3039506678  |
| C  | -2.2251731238 | 0.2470512924  | -0.1084198575 |
| C  | -3.5615961583 | 0.8090244215  | -0.4344839801 |
| F  | -4.1970167805 | -0.1064153953 | -1.171454879  |
| F  | -3.3450942153 | 1.8731973119  | -1.2144200562 |
| F  | -4.3802968666 | 1.1827114021  | 0.5401850195  |
| C  | 3.2213602585  | -1.1800760038 | -0.1403058415 |
| C  | 4.6375745569  | -1.3712277002 | -0.014603219  |
| H  | 5.1050471934  | -1.3070389362 | -0.9992670862 |
| H  | 5.0561751442  | -0.5998337166 | 0.6347048966  |
| H  | 4.8385285217  | -2.353939758  | 0.4166919158  |
| N  | 2.0899935469  | -1.0234828124 | -0.2438394336 |

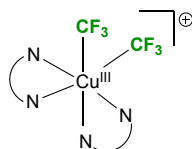

E(UM06) = -1862.77134244

Charge = 1, Multiplicity = 1

|    |               |               |               |
|----|---------------|---------------|---------------|
| Cu | 0.0000004468  | -0.3466445289 | 0.0000009048  |
| N  | -0.8536983996 | 1.0546022053  | -1.1543503257 |
| C  | -0.1048039345 | 1.7727505393  | -1.9956559722 |
| H  | 0.9430346652  | 1.4938321564  | -2.053180929  |
| C  | -0.6255409354 | 2.8019783094  | -2.7556174093 |
| H  | 0.0198270146  | 3.3582243434  | -3.4241607502 |
| C  | -1.9740326804 | 3.0955906177  | -2.6319170892 |
| H  | -2.4191718206 | 3.9033480111  | -3.2024298714 |
| C  | -2.7496612753 | 2.3498740289  | -1.7625076951 |
| H  | -3.8009832323 | 2.5772803228  | -1.6344907044 |
| C  | -2.1678360218 | 1.321025694   | -1.0303925949 |
| N  | -2.2492926161 | -0.1108091138 | 0.8829069141  |
| C  | -2.9491892742 | 0.4974428049  | -0.082868996  |
| C  | -4.3256243272 | 0.3456687644  | -0.2065357219 |
| H  | -4.8679728541 | 0.8165821298  | -1.018059513  |
| C  | -4.992593991  | -0.4488415683 | 0.7122312743  |
| H  | -6.0649147596 | -0.5910194699 | 0.6323293851  |
| C  | -4.2716984545 | -1.0615869507 | 1.7239215912  |
| H  | -4.7553104535 | -1.6868584421 | 2.4651011682  |
| C  | -2.89955969   | -0.8651496693 | 1.7646608792  |
| H  | -2.2972740231 | -1.3341537893 | 2.5392405569  |
| C  | 0.42844208    | -1.7665144311 | 1.2892494973  |
| F  | 0.2859360354  | -1.2426262327 | 2.5145069642  |
| F  | -0.3592731835 | -2.8415045643 | 1.2594851198  |
| F  | 1.6897832938  | -2.1757690944 | 1.1740664544  |
| C  | 2.1678359015  | 1.3210308235  | 1.0303884399  |
| C  | 0.1048032725  | 1.7727587094  | 1.9956492404  |
| C  | 0.6255396581  | 2.8019894648  | 2.7556070649  |

|   |               |               |               |
|---|---------------|---------------|---------------|
| C | 1.9740313467  | 3.0956017545  | 2.6319061519  |
| C | 2.7496605161  | 2.3498821996  | 1.7624998195  |
| H | -0.9430353014 | 1.4938403139  | 2.053174646   |
| H | -0.0198287391 | 3.3582378204  | 3.4241480409  |
| H | 2.4191700073  | 3.9033614506  | 3.202416046   |
| H | 3.8009823697  | 2.5772885884  | 1.6344823393  |
| C | 2.9491893957  | 0.4974445675  | 0.0828680583  |
| C | 4.32562458    | 0.3456712831  | 0.2065347747  |
| C | 4.9925938714  | -0.4488430683 | -0.7122289969 |
| H | 4.8679735712  | 0.8165881702  | 1.0180561824  |
| C | 2.8995588997  | -0.8651568121 | -1.7646551004 |
| C | 4.2716977915  | -1.0615934041 | -1.7239159177 |
| H | 6.0649147249  | -0.5910203543 | -0.6323271139 |
| H | 2.2972727573  | -1.3341648045 | -2.5392320572 |
| H | 4.7553094537  | -1.686868276  | -2.4650928606 |
| N | 0.8536982807  | 1.0546074473  | 1.1543465913  |
| N | 2.249292254   | -0.1108121597 | -0.8829043912 |
| C | -0.4284422759 | -1.7665201138 | -1.2892411147 |
| F | 0.3592718292  | -2.8415109184 | -1.2594719114 |
| F | -1.6897838617 | -2.1757731147 | -1.1740560609 |
| F | -0.2859359125 | -1.2426376397 | -2.5145010075 |

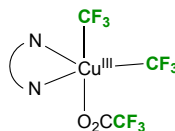

E(UM06) = -1893.94778556

Charge = 0, Multiplicity = 1

|    |               |               |               |
|----|---------------|---------------|---------------|
| Cu | -0.3826894374 | -0.7054297645 | -0.338826477  |
| N  | -0.2139898651 | 1.1090695777  | -1.0796609395 |
| C  | 0.4668475697  | 1.3226599318  | -2.2074344765 |
| H  | 0.7514250276  | 0.4425130894  | -2.7758734146 |
| C  | 0.8011164189  | 2.5933502627  | -2.6319291943 |
| H  | 1.3609470075  | 2.7274314852  | -3.5490471589 |
| C  | 0.4032634425  | 3.6706059184  | -1.8547968296 |
| H  | 0.649530936   | 4.684284014   | -2.1514094574 |
| C  | -0.3022814863 | 3.4437836411  | -0.6866982444 |
| H  | -0.5969475798 | 4.2760954972  | -0.0599682717 |
| C  | -0.5954730823 | 2.1400214955  | -0.3060595353 |
| N  | -1.2340733187 | 0.5165740473  | 1.3251006052  |
| C  | -1.2811223516 | 1.8059763039  | 0.9586769498  |
| C  | -1.9313316038 | 2.7608499426  | 1.7301877117  |
| H  | -1.9822584807 | 3.7952950663  | 1.412635811   |
| C  | -2.5327401184 | 2.3678841635  | 2.9152553927  |
| H  | -3.0468556542 | 3.096855811   | 3.532209104   |
| C  | -2.4715531657 | 1.0382215921  | 3.295127466   |
| H  | -2.9257154125 | 0.6891805615  | 4.2147629295  |
| C  | -1.8148131904 | 0.145687848   | 2.4612488627  |
| H  | -1.7501617226 | -0.9073063698 | 2.7214147582  |
| C  | -0.5813549406 | -2.4314520717 | 0.5057449913  |
| F  | 0.0922734557  | -2.3426107123 | 1.655239311   |
| F  | -1.831374812  | -2.7656709365 | 0.8289656405  |
| F  | -0.0500134246 | -3.4133909809 | -0.208534889  |
| O  | 1.5680687636  | -0.8381959302 | -0.0855242108 |
| C  | 2.2777190203  | 0.0721752992  | 0.4404466172  |
| O  | 1.9579969449  | 1.0705423383  | 1.05424416    |
| C  | 3.7842733931  | -0.1760033555 | 0.1607793476  |
| F  | 4.5700639442  | 0.6331267367  | 0.8629207201  |
| F  | 4.1501176216  | -1.4300260089 | 0.4319761232  |
| F  | 4.0393183944  | 0.043749119   | -1.1384869552 |
| C  | -1.9409177842 | -1.1348560681 | -1.4698276871 |
| F  | -3.0287624087 | -0.6009130557 | -0.9085244226 |
| F  | -2.206918793  | -2.4130553989 | -1.7319742704 |

F -1.7723083076 -0.5423060889 -2.6586800675

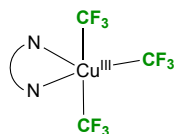

E(UM06) = -1705.38587253

Charge = 0, Multiplicity = 1

|    |               |               |               |
|----|---------------|---------------|---------------|
| Cu | -0.6986213541 | -0.2823872189 | 0.0000010895  |
| N  | 1.0567139747  | -1.2239801553 | 0.0000129349  |
| C  | 1.1219625374  | -2.5547534813 | 0.0000277847  |
| H  | 0.1749295748  | -3.0873088347 | 0.0000280171  |
| C  | 2.3299633744  | -3.2276998592 | 0.0000423575  |
| H  | 2.3469702853  | -4.3104815429 | 0.0000543967  |
| C  | 3.4964065524  | -2.4797344723 | 0.0000416001  |
| H  | 4.4642396975  | -2.9690661949 | 0.0000532867  |
| C  | 3.4205801132  | -1.0969780373 | 0.0000261244  |
| H  | 4.327284327   | -0.5052115857 | 0.0000262786  |
| C  | 2.1754809393  | -0.4814432009 | 0.0000117245  |
| N  | 0.7258464598  | 1.416212636   | -0.0000057411 |
| C  | 1.9942546796  | 0.9893273035  | -0.000005018  |
| C  | 3.0576698065  | 1.8840058701  | -0.0000206705 |
| H  | 4.0841955144  | 1.538317702   | -0.0000210898 |
| C  | 2.7855156278  | 3.2432721027  | -0.0000373922 |
| H  | 3.6004321486  | 3.9591240015  | -0.0000504629 |
| C  | 1.469259088   | 3.6752407548  | -0.0000376265 |
| H  | 1.2186061945  | 4.7293265955  | -0.0000504431 |
| C  | 0.4655029475  | 2.718329229   | -0.0000213216 |
| H  | -0.5847831472 | 3.0002967167  | -0.0000209112 |
| C  | -0.7026626351 | -0.3068329595 | -1.9863085471 |
| C  | -2.6127424401 | 0.1329083438  | -0.0000129932 |
| C  | -0.7026795883 | -0.306801931  | 1.9863110164  |
| F  | -1.2181429633 | -1.4495197231 | -2.4842399784 |
| F  | 0.5498126637  | -0.2332975035 | -2.4940373811 |
| F  | -1.3664512059 | 0.7103979627  | -2.5675186922 |
| F  | -2.7288269492 | 1.4766515484  | -0.0000545533 |
| F  | -3.2997519234 | -0.310533642  | -1.0621397328 |
| F  | -3.2997583486 | -0.3104663319 | 1.0621371435  |
| F  | -1.3664382793 | 0.7104654663  | 2.5674926481  |
| F  | -1.2182049579 | -1.4494597794 | 2.4842612145  |
| F  | 0.5497932859  | -0.2332997793 | 2.4940509378  |

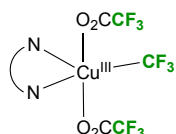

E(UM06) = -2082.50075338

Charge = 0, Multiplicity = 1

|    |               |               |               |
|----|---------------|---------------|---------------|
| Cu | 0.0000433789  | -0.0822957401 | -0.5060192517 |
| N  | 0.0000195755  | 0.5317742763  | 1.3390032175  |
| C  | 0.0000429457  | -0.2888193462 | 2.3860295971  |
| H  | 0.0001054984  | -1.3527007768 | 2.1660702859  |
| C  | -0.0000126155 | 0.2001265652  | 3.6805705087  |
| H  | 0.0000084159  | -0.4867902623 | 4.5175598729  |
| C  | -0.0000967557 | 1.5736756374  | 3.8670506463  |
| H  | -0.0001434485 | 1.9903695252  | 4.8681521115  |
| C  | -0.0001227336 | 2.4184536171  | 2.768304356   |
| H  | -0.0001892473 | 3.4926090773  | 2.9058057174  |
| C  | -0.0000634436 | 1.8645507052  | 1.4971356115  |
| N  | -0.0000185901 | 1.9023646929  | -0.8948914196 |
| C  | -0.0000781678 | 2.6317181155  | 0.2446512271  |

|   |               |               |               |
|---|---------------|---------------|---------------|
| C | -0.0001394083 | 4.0165519788  | 0.2083047713  |
| H | -0.0001881897 | 4.5866450721  | 1.1290840714  |
| C | -0.0001369319 | 4.6651821618  | -1.0152423614 |
| H | -0.0001847964 | 5.748487584   | -1.0580707678 |
| C | -0.0000709256 | 3.9114318506  | -2.1744801515 |
| H | -0.0000637638 | 4.3720039069  | -3.1545139101 |
| C | -0.0000134134 | 2.5308925132  | -2.0702204613 |
| H | 0.000037549   | 1.9206971337  | -2.9640565402 |
| C | 0.0000763563  | -0.6971915378 | -2.3300180371 |
| F | -1.0795024643 | -0.2221437013 | -2.9284178238 |
| F | 1.0796799484  | -0.2221357249 | -2.9283655104 |
| F | 0.0000797478  | -2.0011594604 | -2.3905922656 |
| O | -1.5394334108 | -1.3277211093 | -0.2223436053 |
| C | -2.6338239438 | -0.7142126921 | -0.0181123131 |
| O | -2.8874022354 | 0.4694889981  | -0.1174850268 |
| C | -3.7349337856 | -1.6865802033 | 0.4779676494  |
| F | -4.931676491  | -1.1141263606 | 0.5135732873  |
| F | -3.8259370413 | -2.7731095767 | -0.2885728266 |
| F | -3.4414753835 | -2.0922209301 | 1.7210961907  |
| O | 1.5394655351  | -1.3277417239 | -0.2222954521 |
| C | 2.6338954418  | -0.714249928  | -0.0182121298 |
| O | 2.8875087532  | 0.4694286458  | -0.1177495516 |
| C | 3.7350010244  | -1.6866081342 | 0.4778941075  |
| F | 3.8259521909  | -2.7731825257 | -0.2885894436 |
| F | 3.4415793716  | -2.0921712442 | 1.7210552402  |
| F | 4.9317554538  | -1.1141760794 | 0.5134223796  |

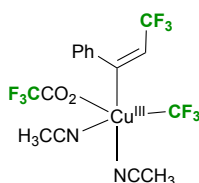

E(UM06) = -1972.49499366

Charge = 0, Multiplicity = 1

|    |               |               |               |
|----|---------------|---------------|---------------|
| N  | -2.2426333682 | 0.5139209908  | -1.1791790873 |
| C  | -3.1966044019 | 0.8888856061  | -1.6917521841 |
| C  | -4.3931684719 | 1.3614877922  | -2.3338651037 |
| H  | -5.1553159936 | 1.5755884966  | -1.5822327856 |
| H  | -4.1751559098 | 2.2743421597  | -2.8916069084 |
| H  | -4.770575376  | 0.6020036381  | -3.0210771377 |
| O  | -0.2754583002 | 2.9238957722  | -1.2768852292 |
| C  | -0.3656882903 | 2.8021263224  | -0.0710189442 |
| O  | -0.4668837918 | 1.7556233189  | 0.6405212244  |
| C  | -0.3655287002 | 4.0760112837  | 0.8153983204  |
| F  | -1.5011107487 | 4.1691192351  | 1.518036348   |
| F  | -0.2454887968 | 5.1890658319  | 0.1001701753  |
| F  | 0.6445819208  | 4.0522648967  | 1.6927548347  |
| Cu | -0.5201866183 | 0.0316648965  | -0.2820200573 |
| C  | 1.3445299873  | -0.2142809594 | 0.1797043708  |
| C  | 1.5854323244  | -0.9501227056 | 1.2485252512  |
| C  | 2.1759326476  | 0.7178757962  | -0.5628583006 |
| H  | 0.8045997523  | -1.5142574648 | 1.7506769978  |
| C  | 2.9238377138  | -1.1067499199 | 1.8894080209  |
| C  | 2.6688730818  | 1.8457774681  | 0.1073373717  |
| C  | 2.4663110715  | 0.5461528184  | -1.9198264169 |
| F  | 3.9536194374  | -0.8559733148 | 1.0809635422  |
| F  | 3.0589235933  | -0.299104887  | 2.9571381458  |
| F  | 3.0772159555  | -2.3604678179 | 2.3430644103  |
| C  | 3.4419137858  | 2.7753763639  | -0.5656256869 |
| H  | 2.4309841176  | 1.9844500661  | 1.1579407572  |
| C  | 3.2437501141  | 1.4793840664  | -2.5854783858 |
| H  | 2.0821963579  | -0.3195821825 | -2.4466166658 |

|   |               |               |               |
|---|---------------|---------------|---------------|
| C | 3.7277439286  | 2.5963789784  | -1.9144434756 |
| H | 3.8195248709  | 3.6452561439  | -0.0374444482 |
| H | 3.4706405384  | 1.337042437   | -3.6371468846 |
| H | 4.3282247051  | 3.32938566    | -2.4438470473 |
| C | -0.3804098571 | -1.7515133809 | -1.0969710719 |
| F | 0.1021966481  | -2.735642258  | -0.3381244633 |
| F | 0.3176237866  | -1.7507471767 | -2.2427020267 |
| F | -1.6314853213 | -2.1223850318 | -1.4147357099 |
| C | -3.1022655753 | -1.633237142  | 3.6473759667  |
| H | -3.5318311369 | -2.6237080363 | 3.4856051721  |
| H | -3.9097890685 | -0.920330853  | 3.8246126419  |
| H | -2.4583123266 | -1.6653487226 | 4.5283436931  |
| C | -2.3366494309 | -1.2333867495 | 2.4930382816  |
| N | -1.7250588544 | -0.9143264367 | 1.5724404948  |

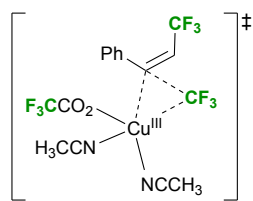

E(UM06) = -1972.48620155  
Charge = 0, Multiplicity = 1

|    |               |               |               |
|----|---------------|---------------|---------------|
| N  | -2.3447039716 | 0.1572667794  | -1.1580402377 |
| C  | -3.3573159122 | 0.3743846334  | -1.6509729046 |
| C  | -4.6259614793 | 0.6483057931  | -2.2717428268 |
| H  | -4.7471145593 | 1.725309183   | -2.403157437  |
| H  | -4.6732631928 | 0.1619535884  | -3.2479489065 |
| H  | -5.4359984564 | 0.2714096917  | -1.6445609753 |
| O  | -0.2902082013 | 2.7192691722  | -1.4263686114 |
| C  | -0.3356697673 | 2.7159107575  | -0.2068226274 |
| O  | -0.4750461385 | 1.7524869195  | 0.5972919843  |
| C  | -0.2252440603 | 4.073455733   | 0.5363677486  |
| F  | -1.3872441005 | 4.3766597528  | 1.1341713123  |
| F  | 0.07688828    | 5.0808081573  | -0.2781303681 |
| F  | 0.712176161   | 4.0396629743  | 1.4905967902  |
| Cu | -0.5462843524 | -0.0517744864 | -0.2886739443 |
| C  | 1.3058839502  | -0.5425290501 | -0.0248504811 |
| C  | 1.5147996657  | -1.3076106849 | 1.0416647453  |
| C  | 2.1645293573  | 0.4591854264  | -0.659658806  |
| H  | 0.7417067574  | -1.9680928137 | 1.4236838625  |
| C  | 2.7898998836  | -1.3791943191 | 1.8126889554  |
| C  | 2.5868121394  | 1.5382958532  | 0.1263269703  |
| C  | 2.5378220921  | 0.4105292264  | -2.005187729  |
| F  | 3.8784553053  | -1.1274248672 | 1.0843168778  |
| F  | 2.8056012557  | -0.5232805347 | 2.8492004154  |
| F  | 2.9398027802  | -2.6063443968 | 2.3323621496  |
| C  | 3.3766075418  | 2.5361201515  | -0.419133957  |
| H  | 2.2702606763  | 1.5992149799  | 1.1630430222  |
| C  | 3.3302077977  | 1.4119886479  | -2.5432475166 |
| H  | 2.2216632019  | -0.4121169804 | -2.6362852387 |
| C  | 3.7493670675  | 2.4768239586  | -1.7560291078 |
| H  | 3.6935244202  | 3.3685303985  | 0.2012935342  |
| H  | 3.6192297697  | 1.3607846221  | -3.5879804893 |
| H  | 4.361769565   | 3.2629191311  | -2.186071521  |
| C  | 0.165168622   | -1.6823400579 | -1.3740651333 |
| F  | -0.6948134519 | -2.5835626278 | -0.8984545603 |
| F  | 1.2860526981  | -2.3583442397 | -1.6525813187 |
| F  | -0.2737201166 | -1.2417354303 | -2.5597021513 |
| C  | -2.8684494915 | -1.4130074963 | 3.7915197394  |
| H  | -3.4169579999 | -0.5216400869 | 4.1021033307  |
| H  | -2.1593180089 | -1.6835122389 | 4.5762152199  |
| H  | -3.5742998176 | -2.2340469918 | 3.6524447935  |

|   |               |               |              |
|---|---------------|---------------|--------------|
| C | -2.1646741745 | -1.1528032123 | 2.5605649342 |
| N | -1.6022627351 | -0.9452700161 | 1.5790614632 |

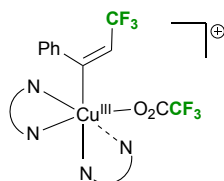

E(UM06) = -2359.59643366  
Charge = 1, Multiplicity = 1

|    |               |               |               |
|----|---------------|---------------|---------------|
| Cu | 0.3680075727  | -0.2002623104 | -0.4113244138 |
| N  | -0.9209734929 | -1.4208794751 | -1.5554286268 |
| C  | -0.6033965058 | -2.70614208   | -1.7274838501 |
| H  | 0.3038536723  | -3.0485861602 | -1.2406844326 |
| C  | -1.3676317075 | -3.5863416036 | -2.4719905349 |
| H  | -1.064676829  | -4.6222390192 | -2.565516452  |
| C  | -2.5075594878 | -3.100186722  | -3.0895910951 |
| H  | -3.1313528683 | -3.7482296158 | -3.6957539698 |
| C  | -2.8335017908 | -1.7647728233 | -2.9344844256 |
| H  | -3.7009310261 | -1.3577540586 | -3.4395769904 |
| C  | -2.0286160081 | -0.9431283303 | -2.1499538064 |
| N  | -1.3760608623 | 1.2838040721  | -1.5452569042 |
| C  | -2.3674478237 | 0.4866691467  | -1.9478121604 |
| C  | -3.6618412206 | 0.9635641194  | -2.1499731479 |
| H  | -4.4673809211 | 0.2947278846  | -2.4301571908 |
| C  | -3.9163647075 | 2.3110448527  | -1.9595371249 |
| H  | -4.9162054105 | 2.7040837877  | -2.1114188639 |
| C  | -2.8820432227 | 3.141369867   | -1.5582595689 |
| H  | -3.0356504284 | 4.2019294313  | -1.3954789172 |
| C  | -1.6339442223 | 2.5742259315  | -1.3521565951 |
| H  | -0.8020519208 | 3.1875881695  | -1.0094673872 |
| C  | -0.500844789  | -0.2520269504 | 1.4965552015  |
| C  | 0.2892192784  | -0.7617075479 | 2.4279148659  |
| C  | -1.9247139909 | -0.1551877423 | 1.3323025922  |
| H  | 1.368889559   | -0.6713459302 | 2.3914838078  |
| C  | -0.2497624277 | -1.4962264649 | 3.6141728033  |
| C  | -2.6285106574 | -1.3356653008 | 1.0492381357  |
| C  | -2.6182146067 | 1.0427828639  | 1.5444886663  |
| F  | -1.4106086482 | -1.0164554217 | 4.0603852161  |
| F  | -0.4442572061 | -2.8007342007 | 3.3517696616  |
| F  | 0.6247620977  | -1.4320680604 | 4.6217260656  |
| C  | -4.0106009257 | -1.3191275087 | 1.0082082451  |
| H  | -2.0802894973 | -2.2590261574 | 0.8808905117  |
| C  | -3.9987592752 | 1.0500414488  | 1.4778621315  |
| H  | -2.0640381095 | 1.9498226539  | 1.760434658   |
| C  | -4.694925153  | -0.1261873188 | 1.2141024887  |
| H  | -4.5555805481 | -2.2353778477 | 0.8070471173  |
| H  | -4.5399763884 | 1.9764973515  | 1.6395521354  |
| H  | -5.7792634327 | -0.1118124188 | 1.1687345197  |
| C  | 3.0427441068  | -0.1280473659 | -1.6784473846 |
| C  | 1.7376756753  | 1.6167871775  | -2.4388677836 |
| C  | 2.7965187433  | 2.1813981062  | -3.1304778815 |
| C  | 4.0271072883  | 1.5487943653  | -3.074293231  |
| C  | 4.1535763918  | 0.3801425176  | -2.3415933908 |
| H  | 0.7499542382  | 2.0670926574  | -2.4508789937 |
| H  | 2.6526709203  | 3.0955096236  | -3.693932072  |
| H  | 4.8859486905  | 1.9611424439  | -3.592770712  |
| H  | 5.113636694   | -0.1172027571 | -2.2795556951 |
| C  | 3.0920219061  | -1.3698912796 | -0.8742775184 |
| C  | 4.1827878542  | -2.233916885  | -0.9007648232 |
| C  | 4.1540481842  | -3.384120522  | -0.1313544857 |
| H  | 5.0436669498  | -2.0215841438 | -1.5227935359 |

|   |              |               |               |
|---|--------------|---------------|---------------|
| C | 1.9922055136 | -2.7423736662 | 0.6125100809  |
| C | 3.0366030639 | -3.6503720846 | 0.6438996495  |
| H | 4.9954850605 | -4.0683816647 | -0.143342488  |
| H | 1.09110718   | -2.9158424074 | 1.1991557004  |
| H | 2.9676353351 | -4.5405817561 | 1.2574140632  |
| N | 1.8552345852 | 0.4959483935  | -1.7293106158 |
| N | 2.0142059974 | -1.6314171625 | -0.1206134651 |
| O | 0.2291326857 | 1.4179937586  | 0.8417597589  |
| C | 1.3329637464 | 1.884507611   | 1.3300599459  |
| O | 2.3380154036 | 1.305309879   | 1.6494375926  |
| C | 1.2426079254 | 3.4290341949  | 1.4273989412  |
| F | 1.321036438  | 3.9517978777  | 0.1967658753  |
| F | 2.2311945404 | 3.9286188751  | 2.1488846077  |
| F | 0.0895248139 | 3.8246757023  | 1.9618484954  |

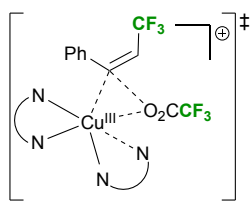

E(UM06) = -2359.59643029

Charge = 1, Multiplicity = 1

|    |               |               |               |
|----|---------------|---------------|---------------|
| Cu | 0.4295729358  | -0.1017254609 | -0.4285331758 |
| N  | -0.6741745248 | -1.0266291376 | -1.969231869  |
| C  | -0.2785598381 | -2.2199200719 | -2.4185514004 |
| H  | 0.5992354132  | -2.6474441001 | -1.9448928134 |
| C  | -0.9303981891 | -2.908172456  | -3.4258359467 |
| H  | -0.5688511155 | -3.8798512217 | -3.7401445571 |
| C  | -2.0354613723 | -2.3153529261 | -4.0133619256 |
| H  | -2.570547224  | -2.8101499137 | -4.8167305192 |
| C  | -2.4391969432 | -1.068747083  | -3.5700154499 |
| H  | -3.2777829611 | -0.5708427363 | -4.0415594012 |
| C  | -1.7472073025 | -0.4461241932 | -2.5347400239 |
| N  | -1.2533293981 | 1.5884220613  | -1.3663861644 |
| C  | -2.1714293721 | 0.8812257827  | -2.0276394775 |
| C  | -3.4690350868 | 1.3527654964  | -2.2210776345 |
| H  | -4.2166362393 | 0.745073025   | -2.7178406331 |
| C  | -3.8038494669 | 2.6069561634  | -1.7399116268 |
| H  | -4.8080262736 | 2.9940839872  | -1.8778004574 |
| C  | -2.8444175715 | 3.3489650576  | -1.0695857975 |
| H  | -3.061944954  | 4.3352301111  | -0.6760421184 |
| C  | -1.5881224772 | 2.7878875658  | -0.8992191603 |
| H  | -0.8139525021 | 3.3293112854  | -0.3575770348 |
| C  | -0.6289445291 | -0.6455523206 | 1.3050583038  |
| C  | 0.0952153486  | -1.3430763709 | 2.1650768976  |
| C  | -2.0316820308 | -0.5491869378 | 1.0129301973  |
| H  | 1.1670734507  | -1.2132447698 | 2.2636325469  |
| C  | -0.5049155082 | -2.3607610228 | 3.0820696469  |
| C  | -2.6386903073 | -1.6368395777 | 0.3665061896  |
| C  | -2.8074430673 | 0.534216568   | 1.4441397884  |
| F  | -1.7544433636 | -2.0830681256 | 3.4515848614  |
| F  | -0.5260564772 | -3.5848227908 | 2.5260565947  |
| F  | 0.2305281641  | -2.4560964886 | 4.1935511292  |
| C  | -4.0087327596 | -1.6490111192 | 0.1808749184  |
| H  | -2.0268920815 | -2.4701418962 | 0.0302510277  |
| C  | -4.1732725125 | 0.5193023827  | 1.2324732485  |
| H  | -2.3277586257 | 1.3708153226  | 1.9407144692  |
| C  | -4.7744226801 | -0.5688381253 | 0.6061965201  |
| H  | -4.4802785936 | -2.4975802739 | -0.3034939386 |
| H  | -4.7779833271 | 1.3571972291  | 1.5635356806  |
| H  | -5.8482606648 | -0.573875397  | 0.4484220358  |
| C  | 3.2269244464  | 0.3619652615  | -1.2736298046 |

|   |               |               |               |
|---|---------------|---------------|---------------|
| C | 1.9176091844  | 2.1970710954  | -1.7662045108 |
| C | 3.0181805951  | 2.9543015109  | -2.1319677069 |
| C | 4.271419091   | 2.3709888242  | -2.0487196172 |
| C | 4.3792716234  | 1.0590690724  | -1.6171024837 |
| H | 0.9106916029  | 2.599136488   | -1.8185684192 |
| H | 2.8881171736  | 3.9755396911  | -2.4694955719 |
| H | 5.1615690038  | 2.930959925   | -2.3143413554 |
| H | 5.3545679719  | 0.5948236735  | -1.5369998709 |
| C | 3.2517982822  | -1.0427921512 | -0.8079802303 |
| C | 4.3876615936  | -1.8411579192 | -0.9031368759 |
| C | 4.3327319163  | -3.1513554763 | -0.4602005868 |
| H | 5.3045769698  | -1.4528584498 | -1.3293072197 |
| C | 2.0601574924  | -2.7815918223 | 0.1208310579  |
| C | 3.1456624583  | -3.638558957  | 0.0634694115  |
| H | 5.2087457514  | -3.7870146409 | -0.5299826625 |
| H | 1.1052643622  | -3.1237504185 | 0.5176144848  |
| H | 3.0552308752  | -4.658478324  | 0.4172599821  |
| N | 2.0166460091  | 0.9382696439  | -1.3430405876 |
| N | 2.1062293401  | -1.5187767594 | -0.2988535963 |
| O | 0.0685804739  | 1.1562493052  | 1.1525556033  |
| C | 1.0847534062  | 1.5249619291  | 1.8635147161  |
| O | 2.081875933   | 0.9170178532  | 2.1535581107  |
| C | 0.8987760185  | 2.9986078456  | 2.3089518685  |
| F | 1.09529432    | 3.8027599035  | 1.2558717098  |
| F | 1.7663538169  | 3.3348106902  | 3.2481500314  |
| F | -0.3290776831 | 3.2276746842  | 2.7687231927  |

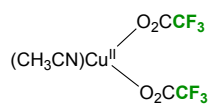

E(UM06) = -1382.44298387

Charge = 0, Multiplicity = 2

|    |               |               |               |
|----|---------------|---------------|---------------|
| Cu | 0.3260837312  | -0.3915615834 | -0.1549333126 |
| O  | 0.4169179504  | 1.4572014709  | -0.3033934112 |
| O  | 1.205600923   | 1.6835755932  | 1.7850153758  |
| C  | 0.8528200824  | 2.1110733346  | 0.7115433635  |
| C  | 0.8977239994  | 3.6281064647  | 0.4124689706  |
| F  | -0.3134223613 | 4.0810301759  | 0.0835376176  |
| F  | 1.7168958389  | 3.8795059067  | -0.6112246453 |
| F  | 1.3246789076  | 4.3215146614  | 1.4572482459  |
| C  | 3.3335076622  | -1.1260116271 | 0.0115256346  |
| C  | 4.725896094   | -1.4653955576 | 0.0796984695  |
| H  | 5.1650400452  | -1.4061708945 | -0.9181621441 |
| H  | 5.2417204146  | -0.7686963616 | 0.7432487175  |
| H  | 4.8377525054  | -2.481250538  | 0.4633931312  |
| N  | 2.2218033379  | -0.8549404611 | -0.0448733983 |
| O  | -0.4638840657 | -2.0679305179 | -0.047462424  |
| C  | -0.251662099  | -2.896780888  | -1.0043891314 |
| O  | 0.39467641    | -2.7333840662 | -2.0116710621 |
| C  | -0.9485559471 | -4.2493568815 | -0.7250684333 |
| F  | -2.2574050611 | -4.0793916575 | -0.5322858766 |
| F  | -0.4456016299 | -4.8124048785 | 0.3765068905  |
| F  | -0.7891827382 | -5.1000636944 | -1.7280265778 |

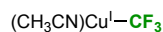

E(UM06) = -667.747922302

Charge = 0, Multiplicity = 1

|    |              |               |               |
|----|--------------|---------------|---------------|
| Cu | 0.9035671747 | 0.0616466945  | 0.7150405152  |
| C  | 3.8697155962 | 0.5953240687  | 0.6993823659  |
| C  | 5.2842152242 | 0.8454131407  | 0.6897761979  |
| H  | 5.5210230629 | 1.6570924386  | 1.3804433651  |
| H  | 5.8204737855 | -0.0545681249 | 0.9971052846  |
| H  | 5.6027540986 | 1.1263621293  | -0.3160847936 |

|   |               |               |               |
|---|---------------|---------------|---------------|
| N | 2.7397650698  | 0.3947267285  | 0.7063774394  |
| C | -0.9809063243 | -0.2850312054 | 0.7235221105  |
| F | -1.7753250964 | 0.8219076273  | 0.5611478759  |
| F | -1.4580820697 | -0.855042494  | 1.8769554033  |
| F | -1.4163195214 | -1.1383190033 | -0.2588887642 |

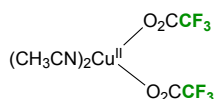

E(UM06) = -1515.17595483

Charge = 0, Multiplicity = 2

|    |               |               |               |
|----|---------------|---------------|---------------|
| Cu | 0.3266709817  | -0.3769633876 | -0.2060077388 |
| O  | -1.5108897386 | -0.0206327892 | -0.7504473815 |
| O  | -1.8860114818 | 0.156299674   | 1.4498938312  |
| C  | -2.2275698176 | 0.1595627835  | 0.2817736664  |
| C  | -3.7087546292 | 0.4167616958  | -0.0864223236 |
| F  | -4.2146268655 | -0.611812141  | -0.7716867109 |
| F  | -3.8210851321 | 1.5057446951  | -0.8547591879 |
| F  | -4.4676896466 | 0.600929556   | 0.9864009419  |
| C  | 0.8024030433  | 2.7116495345  | -0.1031606205 |
| C  | 3.3287747908  | -1.1128489161 | 0.2682671473  |
| C  | 0.9544204088  | 4.1390761958  | -0.0544857462 |
| H  | -0.0288770689 | 4.6133946762  | -0.0651858078 |
| H  | 1.4815448725  | 4.4226047776  | 0.8584546947  |
| H  | 1.5267965678  | 4.4779274673  | -0.9201533082 |
| C  | 4.6919568319  | -1.5146311132 | 0.4763273769  |
| H  | 5.1601850271  | -1.733859584  | -0.4852403877 |
| H  | 5.2431675137  | -0.7123750626 | 0.970341267   |
| H  | 4.7195804247  | -2.4095025529 | 1.1009659805  |
| N  | 0.6789787335  | 1.57294548    | -0.1422451955 |
| N  | 2.2406145279  | -0.7941940211 | 0.1016107853  |
| O  | -0.1064935543 | -2.2691830686 | -0.0333118634 |
| C  | 0.042129018   | -2.8404768568 | -1.1571925924 |
| O  | 0.412691498   | -2.3549567429 | -2.2098163588 |
| C  | -0.3045698084 | -4.3469938415 | -1.083932308  |
| F  | -0.1655205797 | -4.9518676095 | -2.2568528082 |
| F  | 0.4924694619  | -4.970286248  | -0.2091146521 |
| F  | -1.5640853789 | -4.5277456009 | -0.6788126996 |

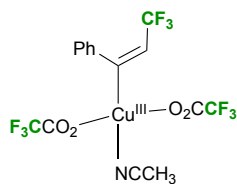

E(UM06) = -2028.33292410

Charge = 0, Multiplicity = 1

|    |               |              |               |
|----|---------------|--------------|---------------|
| N  | -2.1995547865 | 0.6039955419 | -1.1456138254 |
| C  | -3.25180496   | 0.7841328671 | -1.5645623945 |
| C  | -4.5704861336 | 1.010021621  | -2.0902769565 |
| H  | -5.3171070057 | 0.6326810698 | -1.3889210004 |
| H  | -4.7288455055 | 2.0793578597 | -2.2421219833 |
| H  | -4.6805848084 | 0.4916093259 | -3.0446478035 |
| O  | -0.1041898005 | 3.0085249904 | -1.3691723021 |
| C  | -0.231954509  | 2.9392613474 | -0.1661214631 |
| O  | -0.3031838184 | 1.8998428347 | 0.5751892389  |
| C  | -0.3070533948 | 4.2334269439 | 0.6825494688  |
| F  | -1.4125516903 | 4.2560428248 | 1.4287656332  |
| F  | -0.3041874291 | 5.3201525342 | -0.0760472758 |
| F  | 0.74091672    | 4.3092933781 | 1.5093239096  |
| Cu | -0.3196738203 | 0.2989567938 | -0.4550021678 |
| C  | 1.5366420497  | 0.0363008571 | 0.1850493477  |

|   |               |               |               |
|---|---------------|---------------|---------------|
| C | 1.5574259079  | -0.8433944257 | 1.1552083625  |
| C | 2.3857145536  | 0.9407180261  | -0.5109364847 |
| H | 0.6678978213  | -1.345167968  | 1.5273549413  |
| C | 2.8175390508  | -1.2746160312 | 1.8396820838  |
| C | 2.847903933   | 2.0881840184  | 0.1602291549  |
| C | 2.7302931477  | 0.7243364851  | -1.8556191178 |
| F | 3.917828076   | -0.7414805075 | 1.318536261   |
| F | 2.7823509639  | -0.9406081157 | 3.1357799649  |
| F | 2.9467818578  | -2.6044971309 | 1.7834668774  |
| C | 3.6547866748  | 2.9891527177  | -0.502990427  |
| H | 2.5689773295  | 2.2416744156  | 1.1981474236  |
| C | 3.5355072309  | 1.6366658905  | -2.5075982218 |
| H | 2.3522184932  | -0.1505398751 | -2.3736909271 |
| C | 3.9915897619  | 2.7682236327  | -1.8366734343 |
| H | 4.0226531393  | 3.8689791724  | 0.0138151573  |
| H | 3.8071462098  | 1.4736845978  | -3.5446687673 |
| H | 4.6164630702  | 3.4860034087  | -2.3582885106 |
| O | -0.2217387662 | -1.4631671181 | -1.1453695322 |
| C | -0.1643614501 | -1.5330375061 | -2.4196930754 |
| O | -0.0341822099 | -0.6395492187 | -3.2273656623 |
| C | -0.2690432051 | -3.004243295  | -2.8946841717 |
| F | -1.4019442388 | -3.5640531697 | -2.4648081611 |
| F | 0.7470275811  | -3.7255929787 | -2.4148728978 |
| F | -0.24553704   | -3.0960698142 | -4.2166642612 |

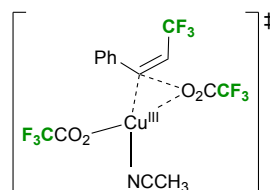

E(UM06) = -2028.31623784

Charge = 0, Multiplicity = 1

|    |               |               |               |
|----|---------------|---------------|---------------|
| N  | -0.5777070188 | -2.5103703127 | -1.1766059561 |
| C  | -0.846297299  | -3.5645355859 | -1.5420886377 |
| C  | -1.1839077349 | -4.8851331412 | -1.9992202805 |
| H  | -1.3676832533 | -5.5360602313 | -1.1422242469 |
| H  | -2.0830600202 | -4.8437616606 | -2.6169495878 |
| H  | -0.3617398265 | -5.2937747632 | -2.5897465355 |
| O  | 1.8004276217  | -1.9095460024 | 1.273511684   |
| C  | 2.3869549432  | -1.347220069  | 0.3645894643  |
| O  | 1.9059018524  | -0.6837264083 | -0.6016495375 |
| C  | 3.9348234364  | -1.3610575402 | 0.3458119929  |
| F  | 4.4138710455  | -1.7163443717 | -0.8482226437 |
| F  | 4.4475969023  | -2.1892076187 | 1.2481697131  |
| F  | 4.401778179   | -0.1325584665 | 0.6149039788  |
| Cu | -0.0580202872 | -0.7012335498 | -0.509715979  |
| C  | -0.2984871159 | 1.3188275592  | -0.1701701485 |
| C  | -0.3322164076 | 1.872819561   | -1.3698906954 |
| C  | 0.1921072457  | 1.6155178082  | 1.1433209623  |
| H  | -0.7658467983 | 1.3767073409  | -2.2327814436 |
| C  | 0.2558834976  | 3.2189655884  | -1.6467899933 |
| C  | 1.5808916794  | 1.7392097321  | 1.3067974848  |
| C  | -0.6671554074 | 1.8248591249  | 2.2302971175  |
| F  | 0.3269734817  | 3.9997879887  | -0.5706720011 |
| F  | 1.4956029698  | 3.1157455757  | -2.1448499538 |
| F  | -0.4788225713 | 3.858926331   | -2.5616183032 |
| C  | 2.0972814472  | 2.0811208754  | 2.541933927   |
| H  | 2.2339325789  | 1.5652957044  | 0.4577060731  |
| C  | -0.1352945472 | 2.155976609   | 3.4621409126  |
| H  | -1.7380482941 | 1.7293987688  | 2.0946752547  |
| C  | 1.2416348663  | 2.2825011471  | 3.61961702    |
| H  | 3.1699655031  | 2.1830911645  | 2.6672276973  |

|   |               |               |               |
|---|---------------|---------------|---------------|
| H | -0.7958468854 | 2.3207248791  | 4.3064681809  |
| H | 1.650505362   | 2.5402923143  | 4.5913020869  |
| O | -1.7404455091 | 0.145603282   | 0.1329993371  |
| C | -2.7473456887 | 0.142198857   | -0.6995209666 |
| O | -2.7218071503 | 0.0876991137  | -1.8969173456 |
| C | -4.0742835917 | 0.2485479454  | 0.0882154741  |
| F | -4.1911203223 | -0.7523652644 | 0.957325079   |
| F | -5.1155235937 | 0.2207458379  | -0.7245997477 |
| F | -4.1041427592 | 1.3933819768  | 0.7724456429  |
